# Supplementary material for: Akkermansia muciniphila counteracts the deleterious effects of dietary emulsifiers on microbiota and host metabolism
Source: Gut. 2023 Jan 16;72(5):906–17. doi: 10.1136/gutjnl-2021-326835 (PMC10086484; doi:10.1136/gutjnl-2021-326835)
Supplement: Supplementary data [file gutjnl-2021-326835supp003.xlsx]

## Sheet: Table S3_680 DEGs emulsifiers
	Colon RNAseq DEGs altered by emulsifiers - Fragments Per Kilobase Million (FPKM)
Group	Water					CMC					P80					Water - A. muc.				CMC - A. muc.					P80 - A. muc.
gene_ID Mice_ID	1	2	3	4	5	1	2	3	4	5	1	2	3	4	5	1	2	4	5	1	2	3	4	5	1	2	3	4	5
2210010C04Rik	0	0	0	0	0	42.3778	0	0	0	0	0	0	0	0	0	0.0831507	0	0	0	0	0	0	0	0	0	0	0	0	0
2210407C18Rik	15.0477	16.6313	15.7596	20.1018	12.5814	6.12513	12.2804	12.0755	10.3871	7.74701	6.13082	26.893	17.9154	22.5405	12.4738	13.7496	4.10315	25.6607	22.0912	14.3843	19.6229	24.2589	11.1236	20.8875	9.15507	15.6264	20.3427	38.7033	8.18765
2310039H08Rik	24.6144	34.4659	32.7816	36.8834	47.0054	19.974	21.5893	31.2608	18.2207	28.0296	25.1423	26.4841	28.6996	17.6432	19.4246	30.2685	26.2629	15.2453	23.3755	30.3536	22.2896	24.6329	27.5308	36.6233	37.5723	40.4416	36.6279	30.048	27.6126
4930503E24Rik	50.3781	44.7832	35.8224	47.6387	76.103	37.1757	39.6216	41.8482	35.5636	37.8911	49.4018	50.7057	49.1978	40.0436	45.4277	33.5938	35.9501	31.3935	36.1081	53.2357	33.3573	42.4148	58.0388	49.1715	44.9191	45.22	42.9482	37.1495	45.3303
4931406C07Rik	25.0847	24.1216	24.1609	19.377	22.3119	40.3086	34.4952	29.4362	39.2823	35.454	25.3952	35.6889	35.0339	30.9069	34.69	26.5551	16.1854	28.725	29.4047	28.5509	33.4994	30.9174	21.7325	33.6046	26.6148	24.7571	23.3404	32.5073	26.0324
9530053A07Rik	16.5786	9.74644	10.4393	22.351	8.16059	9.51224	29.2421	28.1284	15.3743	12.3822	44.149	11.6663	16.7144	26.9549	25.7022	28.3333	29.6326	17.6406	16.3973	14.9508	13.5924	10.3174	13.8008	15.3675	11.1717	25.3991	11.619	10.6677	14.5695
A330023F24Rik	9.18746	8.61827	9.65237	8.52344	10.9991	14.0168	11.7057	11.2813	14.6557	13.7457	8.79629	8.50293	8.19218	11.1233	13.257	9.3297	10.751	12.4007	11.7547	10.2339	9.06398	11.7758	10.7161	10.6241	9.69677	10.2241	9.85495	10.5727	14.3791
AA467197	110.926	158.841	92.864	141.406	263.411	88.49	103.482	94.8383	90.9372	87.6614	197.379	96.9604	105.562	89.6269	83.4152	71.291	93.5109	97.6819	112.286	145.594	76.0479	111.742	173.329	138.747	116.845	128.486	112.678	79.4836	114.184
Acacb	2.53337	3.95456	3.69212	2.83389	1.89	3.95847	4.8016	3.89094	4.57396	4.61136	4.6044	5.06527	4.36069	4.73489	4.25206	5.01679	3.40079	4.10311	3.40545	3.01331	4.9778	3.66894	3.46797	4.56947	4.31372	3.12601	4.03	6.27784	3.73595
Adamts15	6.19552	7.17661	5.46878	9.86706	7.30918	4.6069	4.71406	4.34869	4.06141	3.28451	3.25489	3.36332	7.94996	7.06946	4.17465	4.53366	5.63678	4.36147	4.45812	2.64033	3.01205	3.99652	3.98777	3.9015	4.7732	5.18565	2.81524	2.39302	4.3116
Adar	14.7867	19.3477	20.2837	21.4466	15.4303	13.6207	13.3338	13.0526	12.0172	13.7379	19.9485	19.2759	20.7806	23.7566	22.2145	19.946	18.3055	13.5977	18.4171	15.9605	17.7189	13.7583	14.3916	14.1547	18.7212	15.1712	16.2141	20.263	15.3909
Als2cl	6.47246	7.81473	8.54941	7.32261	5.0806	12.6753	8.26059	8.23863	11.0627	7.89683	7.30507	8.56435	7.66995	8.56331	9.67147	8.92135	7.20965	8.11025	7.64084	7.25346	7.92751	7.79778	5.87727	7.85949	6.7894	6.01645	6.88433	9.61494	8.09494
Amy2a1	0	0	0	0	0	23.9587	0	0	0	0	0.878723	0	0	0	0	0	0	0	0	0	0	0	0	0	0	0	0	0	0
Amy2a5	0	0	0	0	0	23.3247	0	0	0	0	0	0	0	0	0	0.115497	0	0	0	0	0	0	0	0	0	0	0	0	0
Ang4	430.001	135.018	113.423	727.309	387.511	120.159	471.129	452.628	198.031	70.1493	787.244	13.9447	110.245	360.051	784.749	117.338	824.163	134.003	196.708	282.483	136.322	85.4583	42.8561	60.25	27.1546	670.042	24.3476	28.638	452.421
Anxa3	35.3407	27.8139	21.8254	34.784	50.3119	22.4868	24.8961	25.3317	20.7845	18.912	23.3225	18.3212	26.4576	18.5801	16.4979	24.9502	23.5492	21.2247	27.3644	35.2917	22.0304	24.9495	40.734	25.4844	31.4439	26.2304	23.4361	15.9915	26.2923
Anxa8	17.7984	12.3556	9.38874	14.5897	17.5944	8.41767	9.53281	7.33991	8.92433	10.8962	7.25835	6.42388	7.11614	5.57574	7.57601	11.4849	9.39245	10.1033	10.1373	23.6789	5.16501	9.59841	18.4194	9.9211	15.7843	13.8418	9.44679	8.70881	16.1545
Apol7a	14.1561	19.6699	16.1109	14.0173	14.5716	12.343	8.29785	9.87742	10.2574	9.69029	18.8183	18.4651	15.7828	15.9554	17.1089	13.4362	14.1914	10.8688	17.0944	14.4694	14.5012	12.8789	13.5459	9.83991	14.068	14.0526	15.4823	21.742	8.5487
Apol9a	22.6299	26.3229	28.719	29.1645	29.2559	5.43903	4.52996	3.04896	2.89023	3.20483	40.7392	31.2615	31.432	40.0035	41.5002	21.1186	24.4853	8.28844	26.993	20.1497	16.6691	15.0155	16.0534	18.7585	30.8996	13.0581	24.7406	35.7585	15.9832
Apol9b	14.112	17.5094	13.5007	22.1121	14.4758	0.918754	0.68174	1.59974	1.96857	1.40107	20.0386	18.0384	17.4308	26.0651	32.2665	13.3262	16.7971	6.06316	12.8575	12.2172	10.0886	12.2673	7.28911	4.67871	17.066	11.0263	12.9318	16.5406	10.5423
Areg	18.7826	12.1775	7.87179	17.5194	15.0175	10.0341	13.3735	7.57112	5.79357	9.7473	7.73454	6.98918	9.56409	9.85999	6.11606	9.38421	13.3115	6.86263	8.86239	11.2074	6.76619	7.26424	3.94342	8.82215	13.4818	6.94416	6.69087	4.75655	11.2809
Arhgdib	6.8789	6.64577	7.6821	12.4774	17.6818	2.49013	2.62777	5.6512	5.00004	4.25495	2.99989	5.3755	6.77583	3.9563	4.21754	6.90943	7.37555	4.78511	4.72694	14.6363	6.36619	5.72484	8.41067	5.98454	6.47258	9.04726	9.81243	3.66302	8.65815
Arpc5	96.0727	126.883	101.151	116.983	164.419	89.5493	93.0617	80.0221	98.5639	102.895	85.9164	89.1479	82.6382	90.7826	85.2757	87.9248	98.6145	98.0094	98.6989	114.562	94.0358	101.544	125.733	117.548	95.7107	91.8086	109.29	87.8243	107.066
Arrdc3	14.831	19.5711	18.0219	15.4521	20.8988	20.6169	22.8707	16.5879	32.3696	25.9561	18.1949	19.8555	20.174	18.0389	18.7646	18.5218	19.4081	22.059	24.4063	20.0458	22.85	24.9422	23.8136	21.7157	16.1632	19.0303	21.3848	23.2221	24.9959
Asah1	46.1308	55.1742	45.968	55.5167	65.6229	45.5641	36.3913	36.2421	42.4899	39.8105	32.9285	36.9319	41.9218	34.5416	35.6657	34.3776	38.3075	40.3121	39.2923	47.9837	39.2944	47.7578	47.8156	43.4802	48.8863	41.8505	51.1188	47.6214	44.9991
Atf3	18.007	18.8544	24.472	22.5997	20.6768	17.5324	16.2374	10.9342	8.73279	19.626	16.4333	11.3039	14.1472	15.151	9.29955	19.832	20.5898	18.6862	20.4548	25.7854	13.2817	16.4655	10.1283	18.8196	26.0941	18.1083	17.9709	12.0665	28.6349
Atp5c1-ps	97.945	104.976	87.0372	92.9004	157.111	73.122	68.3323	83.4021	61.3712	80.3825	136.455	54.8447	56.0174	54.5602	55.3136	62.7875	75.6595	73.8343	77.9438	94.6839	63.164	72.6119	111.05	96.7026	72.8846	76.2052	82.3124	75.4123	80.237
AW112010	29.8825	27.3902	28.4473	29.8343	57.8112	20.7063	14.3472	26.8937	15.835	23.4091	25.0626	25.9135	33.3789	20.1018	19.3644	19.0853	18.3252	24.1367	28.32	36.2337	20.1995	27.2247	35.2323	24.3394	30.1914	23.4091	42.1839	30.4006	26.7609
B2m	86.0198	78.9431	63.0653	85.4106	119.941	34.4346	32.2197	40.406	47.8181	40.6605	91.7605	74.1158	87.6563	63.6869	95.4363	77.0794	75.1022	61.6625	80.7649	71.606	63.1339	63.7639	69.5357	75.4273	69.5345	67.9436	66.4365	83.0464	54.4209
B3gnt5	15.4931	12.7368	9.6809	16.4493	16.2086	9.35268	8.1335	9.30838	9.16498	11.7868	9.80805	7.00949	13.3207	10.7751	7.57429	10.5298	13.6071	10.2658	13.6731	15.0253	8.82167	13.4911	10.8683	11.1633	10.4507	12.6593	10.1581	4.51432	13.4115
B3gnt7	164.744	177.153	134.47	222.264	180.167	110.049	92.2125	150.612	123.865	155.134	80.4915	90.3831	183.779	117.42	69.8403	173.558	141.584	128.025	134.055	208.407	119.445	127.399	178.627	122.969	187.314	153.257	135.431	64.8327	145.108
B4galnt2	90.5507	138.232	130.887	78.6749	72.1215	158.317	138.151	122.264	147.021	114.942	104.877	169.886	140.048	146.378	180.785	120.424	119.246	175.127	135.229	105.384	166.238	143.318	93.7067	138.245	111.721	111.271	146.692	184.107	106.723
Batf2	18.8667	19.8077	18.4327	20.6259	18.3244	8.35034	14.1884	17.8835	8.68851	14.0535	17.9833	11.7988	24.3244	14.442	16.683	16.0789	18.7977	11.525	14.3771	13.4646	12.1733	11.645	13.7992	14.7643	22.7421	15.5424	22.5046	18.2441	14.7875
Best2	11.9375	11.5078	9.92937	10.8131	13.0138	4.64033	4.83255	8.45149	6.80438	12.8569	5.76027	5.12951	10.6518	6.19834	3.81674	12.4154	4.49274	8.36782	7.79229	14.6371	7.02412	10.2347	8.57507	12.7447	15.7192	9.68651	11.1617	8.07092	10.0649
Bmp3	9.66538	12.8328	13.6837	9.36251	10.6836	16.5048	18.0335	11.6309	14.523	15.4198	14.522	21.0024	16.88	17.0592	17.8022	10.5666	9.87967	16.3461	14.9227	13.3357	22.7526	16.729	12.6037	16.734	11.3296	9.7222	13.9346	20.5271	13.499
Bst2	22.551	22.5031	19.797	29.8188	35.4841	10.4538	12.6745	13.7903	7.52237	5.33718	28.918	31.5842	32.4893	34.7802	32.9842	17.9614	17.6218	14.4398	15.2011	17.3486	7.47702	14.55	17.597	27.2991	18.1353	17.0661	16.1046	18.5043	13.1224
C1qa	43.9998	24.772	31.374	48.1216	55.0598	23.472	31.75	32.5387	25.4871	27.8469	40.9449	34.504	38.3552	29.7764	26.2415	38.5462	30.4238	32.2319	39.7607	42.919	34.0605	42.5166	44.2515	44.8097	49.2797	29.0309	38.4277	37.3888	43.5208
C1qb	39.5897	27.5369	33.1168	40.0845	53.6939	15.5377	24.6399	30.0075	21.2156	23.2836	36.0946	25.4149	21.8576	26.4223	24.2916	35.2528	27.2048	20.0051	21.176	40.0093	24.1269	29.8165	46.7439	37.3674	42.7511	25.1627	34.6298	32.962	37.8885
C1qc	48.6925	32.6941	41.3665	55.0302	77.3518	20.6257	31.4853	42.5392	29.8309	32.3637	42.2047	36.2298	31.1985	26.9007	22.8121	44.9416	29.5569	24.5268	32.9239	51.2286	47.2716	40.1023	63.9013	43.0761	54.241	50.7625	44.6772	39.1544	44.3253
C3	9.25303	9.46058	10.7178	14.8944	16.379	7.46009	9.49972	10.6472	10.7726	6.8377	16.6312	11.5061	13.7296	9.75403	8.43356	16.3253	9.34201	9.47563	8.58743	13.5944	8.99417	12.3159	14.511	19.0601	17.8326	13.6735	15.7112	9.21255	17.933
C4b	6.00426	5.04019	5.46221	6.43776	6.14903	3.35933	4.37564	4.75514	3.85088	2.69878	6.59816	5.4745	5.6199	5.01858	3.7081	5.60289	4.72971	4.69679	4.38602	3.98307	4.80863	5.37363	7.17232	5.77059	5.61055	7.29868	6.36372	4.05811	5.81043
Cacna1e	2.40302	2.16874	3.12623	2.24918	2.14559	4.02572	3.07547	3.03527	3.44894	3.25749	1.32371	2.73696	1.96027	2.36171	2.90243	2.29029	2.28752	2.83938	3.46814	1.93866	2.91105	1.81784	2.88707	2.59233	3.15797	2.86769	2.14725	2.74356	2.43475
Capzb	63.6577	67.9185	72.4611	81.084	91.855	52.3148	73.7271	65.489	46.5596	49.1465	67.3427	74.773	86.3119	61.2776	70.8972	64.0997	74.8828	60.7677	63.0518	84.9831	61.0228	61.0513	74.9244	58.9731	83.1194	61.4393	70.5816	80.6523	53.0921
Ccl8	8.75155	10.5752	8.69954	9.90195	19.1086	4.83801	1.02921	4.37751	3.96638	3.9235	6.15603	3.30005	6.05759	4.22164	8.19433	3.03877	8.31275	3.06178	10.495	15.4543	2.30203	2.73334	17.1376	4.5961	7.25419	6.62749	14.5987	6.879	9.83059
Cd274	5.04653	6.23646	4.38048	5.60203	4.0286	2.77403	2.37081	2.78283	3.14498	2.29863	4.30932	4.87195	7.22661	4.99346	7.4539	3.5718	4.06232	3.89125	7.42333	3.89999	4.02004	4.15105	4.4425	4.94838	5.42844	7.38093	5.25991	4.77623	4.15522
Cd52	30.2129	20.8112	17.114	27.7125	47.1878	15.5518	16.8354	20.1314	18.6426	5.34998	8.39096	26.962	16.5005	16.0103	15.6938	29.7003	20.8668	13.2997	22.0906	30.9433	15.2919	27.9316	32.4355	42.2607	35.0634	36.1112	26.1143	24.9962	34.1634
Cd74	165.011	137.878	149.881	179.349	221.966	81.0956	81.8035	174.251	87.0954	103.789	180.184	133.029	124.158	103.662	107.16	152.203	137.677	83.9517	111.854	165.217	116.998	121.4	268.794	189.97	175.927	183.315	244.617	191.937	172.107
Cdk2ap2	61.9231	57.5667	64.5707	78.9834	109.666	34.3388	70.4766	60.9611	50.3452	60.281	86.2762	63.6615	73.4264	60.7205	56.0854	61.5591	62.0772	56.7457	53.368	75.5924	67.4034	53.9137	95.6174	68.9102	89.1445	81.423	68.7505	80.7677	59.9506
Cebpd	37.3809	34.1158	30.2185	56.3805	50.9034	19.0439	35.9626	35.4604	21.5574	23.0304	37.6803	22.4046	31.9308	27.0307	22.5131	27.3234	21.9016	20.5763	20.7732	39.3259	20.5734	30.5694	37.4312	35.0771	31.7733	34.4834	34.0789	17.273	27.202
Cela3b	0	0	0	0	0	38.9581	0	0	0	0	1.00009	0	0	0	0	0	0	0	0	0	0	0	0	0	0	0	0	0	0
Celf3	3.16602	2.82144	4.71606	4.20433	4.83966	6.66032	4.26951	5.95088	5.68327	6.53241	2.64531	5.4233	5.01119	4.61102	6.90385	4.23368	4.4082	4.64511	4.57287	4.81928	3.5132	4.41557	2.80907	3.11863	5.39142	3.43747	4.45826	6.58712	4.80002
Ces2a	50.4754	45.1854	49.0537	46.2653	55.8	105.451	93.8934	96.1161	94.63	155.132	54.289	62.534	68.6976	43.4683	53.7945	68.4957	38.7104	56.0054	52.9182	85.1481	61.3142	84.8909	74.9304	79.6978	121.051	117.626	105.93	142.256	100.344
Ces2b	2.80081	2.45142	1.64216	1.50239	2.14904	3.55336	4.29566	3.09893	4.55581	4.84774	1.3788	3.95677	2.40214	3.17808	2.65684	3.39948	1.40166	3.71466	2.86528	2.14681	4.1421	3.87809	2.414	2.46892	2.49482	2.36274	2.56483	3.81295	2.95604
Cfd	20.5493	20.1784	33.1663	28.7219	23.7527	5.14015	20.3031	13.4886	31.7271	6.70567	43.4452	29.4165	30.8956	16.3623	23.1042	70.2946	8.80598	19.1845	17.9713	20.8349	6.54535	25.4318	16.5204	28.5284	31.1947	27.3906	22.6658	26.8021	48.2827
Clps	26.34	33.1166	21.7985	71.0171	34.2938	191.515	36.2728	33.6419	26.1848	17.3656	81.7637	27.0028	15.8448	41.2476	98.2882	38.6646	63.6835	14.5437	27.6142	49.3475	34.1389	18.3883	25.9379	24.6034	26.8032	58.4637	16.064	30.6938	33.5891
Clptm1	47.8481	50.6581	52.509	53.3279	56.9918	26.5592	44.2986	42.4517	33.8584	49.3268	43.7483	42.9712	51.7105	42.6493	40.546	52.394	43.3903	35.8934	39.0197	48.4032	38.8847	39.6113	42.5506	39.826	51.5097	49.7234	47.3154	42.0095	36.2836
Cmpk2	7.91127	9.24519	7.07421	13.1404	11.3856	3.83843	2.97136	3.74968	2.9313	2.79427	11.7014	12.4594	13.1882	13.544	13.4005	6.18566	5.91959	4.00063	8.15682	6.10421	6.3193	5.91115	8.39056	7.09663	9.90869	6.82911	7.76438	10.429	5.96155
Cpa1	0	0	0	0	0	49.1224	0.262224	0	0.8241	0	0	0	0	0	0	0	0	0	0	0	0	0	0	0	0	0	0	0	0
Creb3l1	26.3983	27.4532	26.4814	26.0468	12.2737	38.3932	35.7765	37.9613	28.5878	28.0271	57.3554	39.1633	37.1506	40.6491	45.2185	35.638	38.2981	43.2643	31.6411	22.328	43.5916	22.0126	19.8936	43.8237	24.2896	33.9692	16.8587	19.8717	20.2459
Crip1	206.547	202.943	252.026	288.034	481.49	164.015	228.268	218.486	163.529	246.419	251.025	162.356	216.044	160.318	125.56	244.529	199.348	180.415	213.26	312.366	218.235	264.967	347.45	235.219	292.064	223.408	260.547	213.242	241.739
Cst3	209.337	204.254	210.459	218.681	385.185	181.434	207.685	199.184	167.294	181.182	339.575	213.114	191.068	196.138	180.507	201.873	176.025	181.284	185.25	251.583	192.933	228.423	309.454	239.605	254.423	245.564	223.701	228.074	229.051
Ctse	17.3932	13.6917	11.0424	19.2373	14.6463	9.20048	7.4355	12.4757	8.8538	10.0585	10.6708	8.42608	15.0613	9.26023	7.6505	14.2915	14.252	8.16671	13.8301	11.3041	9.72872	10.643	15.4632	12.662	10.946	11.3434	7.71201	7.17661	14.6905
Cyp2c55	334.49	422.578	379.418	359.601	388.861	590.743	494.207	373.479	621.98	585.069	459.418	526.059	465.91	462.82	460.506	434.606	299.272	461.913	391.456	531.027	559.805	617.465	366.506	485.415	461.166	341.383	489.428	692.199	522.699
Cyp2f2	6.21604	6.70725	3.72329	8.57971	7.72998	2.23056	2.92246	3.39271	2.65188	5.08534	1.34796	4.67883	7.04879	4.13814	2.07888	6.13446	3.42786	4.39056	5.12143	7.85787	4.58594	4.65217	5.6075	2.05716	4.73329	2.47421	4.01074	2.53721	3.8961
Dcn	43.2857	31.0424	40.1964	39.1835	68.1067	32.2684	37.1969	30.5599	33.5944	37.0443	28.7619	38.0437	33.503	27.2436	35.5752	35.7378	37.4681	37.1517	44.9801	45.0768	39.7534	47.2924	57.3891	44.6255	45.3709	41.4771	45.0895	34.6752	46.3791
Ddx58	4.03974	4.8346	4.13387	4.289	3.32199	2.53666	1.41254	2.54423	2.47774	2.26376	4.2368	4.21075	4.55005	6.36237	4.54223	2.61107	3.98061	3.42525	5.12763	3.72108	3.03122	3.25766	2.45181	3.24603	3.55219	2.60317	2.66315	4.14314	3.02676
Ddx60	7.49866	9.63889	6.99176	9.77098	7.05205	2.1039	0.788475	2.32477	2.28313	1.84544	10.4586	13.9357	10.48	13.7464	16.0158	6.842	6.86228	5.19208	9.34778	8.46618	5.23686	6.93939	5.1899	6.4504	8.91432	7.3653	6.52529	9.56095	5.85351
Dnajb1	40.9949	51.2149	28.9417	43.111	41.8428	28.024	25.3295	28.8651	31.6722	27.5089	29.3875	24.5736	24.5137	31.2553	31.0734	20.3198	25.3157	18.4051	21.164	25.224	19.0681	20.8225	21.5523	19.2707	28.3051	26.8259	27.2589	21.3624	30.5817
Duox2	27.3567	23.7619	23.5335	26.5758	23.2003	41.1488	29.1044	41.1259	27.5385	27.6701	62.0043	34.3673	35.2375	41.7135	42.8229	28.5757	27.6091	26.727	23.4904	29.2346	23.4179	27.7613	30.7529	30.468	28.5381	28.7601	16.726	17.9864	19.4866
Fam111a	4.10714	3.47575	4.46522	3.90503	5.30279	3.41882	1.35619	2.66275	2.04136	1.702	2.46498	2.37229	1.75437	2.60671	3.05283	2.29164	2.77128	3.05934	3.91627	2.84594	2.7989	2.89017	2.92533	1.79019	3.53795	4.35623	2.78838	2.32301	3.08955
Fam160b2	4.4909	4.93006	4.48799	4.44922	4.1007	6.9795	6.02095	5.50945	7.66606	5.84146	8.03911	4.70451	5.68265	7.07979	6.81281	6.60805	6.24567	5.73756	6.27014	4.26044	6.44063	4.97874	4.78298	3.78016	4.70371	4.27975	3.67636	5.18878	5.53634
Fos	60.8671	54.7933	60.6562	102.956	70.5097	46.5146	46.1979	57.9586	44.8797	68.2317	62.9801	49.3168	65.1847	51.451	48.3241	87.7772	83.8949	58.6838	79.2637	77.0898	44.9321	89.1037	60.899	64.6248	125.282	57.9241	71.9785	49.6208	120.391
Gbp2	24.7971	27.9887	21.3567	18.5694	27.7707	7.10817	5.37909	20.9909	3.8517	6.75437	30.9564	10.344	27.5993	13.8525	15.615	8.06206	12.1804	7.96498	15.0488	14.3432	7.21202	12.3351	14.3447	12.7028	15.1792	15.4589	24.0521	13.5048	12.9821
Gbp3	5.91118	6.54672	5.82191	7.30165	6.46764	1.98973	2.14654	4.01641	2.05183	1.09628	7.65921	5.03114	6.89614	5.26459	6.93832	3.99611	4.78051	2.30752	5.51229	3.84179	3.99263	3.3141	5.69245	4.09989	5.18445	3.04291	6.63347	5.54128	2.26411
Gbp6	3.41485	3.53976	3.2099	3.5181	3.8789	2.05211	1.02977	2.41627	1.93779	0.758616	5.18458	3.47846	5.7826	4.81536	5.31581	2.28142	2.74771	1.91627	2.43626	2.5572	2.57228	2.11807	2.09601	3.11053	2.12954	0.834292	3.3858	3.19246	2.55459
Gbp7	7.5445	10.0396	7.45908	8.94007	8.02702	4.00328	3.58638	5.69691	4.57429	3.63277	8.96487	9.42998	13.7296	8.37113	8.98592	6.36766	7.12461	5.32929	8.48968	5.23268	4.62369	5.41619	7.04948	5.54906	7.19499	6.10305	9.96326	7.5961	7.38078
Gcnt1	13.9231	13.3173	10.4033	10.5832	12.9832	8.03906	8.23743	7.91206	9.9546	11.3013	10.2946	12.5851	10.3838	8.97094	7.53459	11.5297	8.395	13.0427	14.1455	15.4722	10.5269	11.8455	15.6012	11.4341	12.8016	14.2287	14.9166	11.1301	12.8512
Gemin7	43.6217	35.9845	33.7125	41.1711	55.101	30.8575	29.8611	31.3264	28.004	28.4871	59.6132	27.3987	29.1533	31.0836	32.6802	35.4722	26.2468	28.7023	32.8902	39.9853	32.2544	40.2603	44.6051	38.5831	33.507	31.8068	36.134	30.5295	38.5782
Ggt1	2.18099	2.69981	1.21034	1.08281	0.593334	4.0426	2.87756	3.48701	5.08182	2.93177	2.51641	7.04454	3.38576	4.05431	3.72997	1.42441	0.27577	2.9747	1.40216	2.22096	3.08873	2.75445	0.948365	4.78126	3.22032	2.09443	2.82262	8.1667	2.88818
Gjb5	7.68963	4.25275	3.38635	4.8525	6.64742	2.07766	2.65686	3.64414	3.60748	2.4289	3.86184	2.61195	7.08014	1.33252	0.992032	3.50492	1.57877	4.35351	3.33052	8.59379	3.55754	2.38971	9.48683	3.86596	10.326	6.37661	6.17571	1.99853	5.89047
Gm10080	495.709	554.021	578.557	463.91	1086.6	395.558	399.185	400.881	373.022	536.271	423.908	288.786	330.412	329.54	272.311	312.199	471.867	369.134	443.104	596.797	346.9	461.612	470.486	408.86	465.112	391.402	480.29	350.918	450.962
Gm12174	287.834	366.637	304.704	331.44	651.755	258.265	227.64	226.208	209.118	339.579	232.245	181.397	208.549	166.198	172.529	134.385	246.34	240.447	278.932	415.784	225.567	290.493	371.396	293.066	271.927	255.975	289.279	242.074	298.74
Gm12250	3.98789	9.09685	5.14916	5.61557	5.78686	0.972668	0.441768	2.43726	0.232066	0.739461	7.94858	7.01387	10.308	7.53369	6.98188	2.53829	3.73831	1.77156	4.67875	3.0325	4.84599	2.52137	3.95288	4.05218	4.32013	2.59953	5.0823	6.65636	1.98651
Gm12338	457.022	431.541	462.045	581.09	993.828	388.284	414.071	434.672	318.145	484.696	673.46	324.215	410.86	316.788	309.39	360.004	392.7	311.808	361.544	576.581	326.516	427.136	596.439	479.959	571.063	488.43	509.387	460.26	431.825
Gm14586	736.585	845.702	544.882	706.591	1407.17	536.2	577.61	480.565	350.968	482.329	696.208	460.633	529.67	334.364	487.516	347.542	516.279	463.748	431.399	745.868	477.854	578.751	832.254	619.849	630.874	588.475	477.253	575.429	474.135
Gm15453	75.8571	93.81	63.7011	73.8255	109	66.081	56.9767	63.2885	67.6929	58.9241	113.826	73.2852	58.8093	62.8762	67.8191	43.3202	55.7355	43.85	47.7364	80.1134	68.2481	48.7371	96.2698	85.9221	67.4641	68.6065	68.1364	71.084	64.812
Gm15564	33.3054	21.0669	8.25549	5.07288	5.93077	16.721	31.5375	99.794	218.999	63.4934	117.843	176.455	79.47	44.2729	179.839	8.14973	16.05	21.0609	22.6905	15.3587	50.3347	103.666	54.2128	172.675	20.5346	74.0686	15.5562	67.056	13.5512
Gm15772	641.131	745.837	572.675	757.049	1364.38	595.602	481.841	527.915	472.456	635.942	785.497	429.845	497.471	404.449	354.005	402.352	548.389	503.862	543.045	889.255	528.811	639.92	794.396	750.906	601.939	538.868	667.679	533.123	591.553
Gm21885	7.58165	9.82814	11.5565	6.77618	11.0218	10.8759	14.2711	10.8991	14.5636	13.9619	8.15563	10.4359	10.7026	9.37993	7.57272	11.7827	8.82514	14.0616	18.54	17.1795	14.8437	13.4137	17.8059	12.2438	15.6968	12.8163	13.8186	22.1147	19.4116
Gm2225	102.278	260.437	169.951	143.844	371.187	100.571	75.3394	98.1956	152.091	218.021	97.9451	111.71	90.8286	76.5101	89.9735	75.2855	103.512	137.131	151.952	168.766	114.666	140.946	159.454	153.308	81.1838	147.368	138.678	92.3469	132.021
Gm2a	13.3357	11.0792	11.1036	15.429	16.4232	8.64008	12.3615	10.8828	8.74271	10.4528	10.07	13.4262	12.8472	10.5892	10.4998	12.7464	10.9502	9.71453	11.1429	13.0833	12.2726	13.7962	14.0729	13.6719	13.9533	13.7641	12.7011	11.2548	10.6527
Gm40187	29.4581	25.1242	16.4174	22.5621	46.5285	19.6358	17.7221	23.9473	11.5363	21.7329	39.3247	18.2089	15.2775	16.3569	14.5122	14.737	19.015	16.9538	27.1569	25.5236	18.3294	27.313	37.9254	24.5756	28.6228	29.0116	21.3272	20.6521	26.1573
Gm4184	64.1459	70.7543	46.6759	66.4785	125.27	45.1414	60.0056	37.6762	40.6939	33.4769	91.5149	58.3952	66.3371	52.3187	49.9239	50.6678	50.5839	39.6935	39.588	97.8902	63.8784	50.393	101.121	73.8734	64.4083	62.5965	66.938	65.8604	60.5747
Gm5431	3.67649	3.85925	3.97991	2.87437	2.65846	0.791863	0.799429	1.15084	1.36532	0.33447	7.99138	6.46189	5.95072	5.26046	6.87047	3.00562	2.89868	1.70339	3.9937	2.57742	2.11724	2.64232	2.82855	4.58502	2.88896	3.23554	3.64748	4.31727	1.88326
Gm6252	268.889	268.111	254.955	307.615	565.506	179.665	232.953	197.392	212.477	277.905	258.913	189.64	245.249	199.052	170.185	187.978	240.608	212.508	237.162	359.222	196.071	292.757	405.312	287.839	235.106	278.319	280.61	206.22	231.263
Gm6988	172.49	242.319	151.849	184.863	363.566	132.333	154.102	147.069	168.097	198.653	206.94	126.721	129.972	120.752	118.032	105.4	150.168	167.85	168.185	250.441	127.973	173.226	244.056	219.566	160.491	195.004	215.609	136.606	163.482
Gm8430	90.1094	88.1385	80.9686	68.4923	142.156	73.1569	59.4708	55.3071	55.3291	89.3855	42.7167	48.8401	58.0744	63.5675	59.7378	52.4831	66.1561	72.7491	78.9438	113.035	50.744	70.5296	104.009	64.1909	66.9834	73.7258	76.9975	49.0638	81.484
Gm8623	125.528	110.394	107.851	142.955	232.572	78.2431	107.027	98.1506	74.3681	98.6948	106.688	130.251	124.451	109.936	111.65	110.088	103.268	92.8419	96.2984	158.879	105.577	137.42	175.318	100.684	131.119	141.804	111.609	120.744	98.8675
Gm9385	253.578	277.608	247.53	287.656	589.312	192.968	171.513	217.635	162.113	271.725	251.586	199.879	206.82	180.244	176.174	191.951	239.513	205.572	205.735	342.776	193.351	227.866	299.951	217.105	247.025	219.642	266.725	214.816	214.012
Gpx1	331.309	290.015	285.26	362.342	491.961	245.836	293.734	311.098	215.467	274.168	468.89	262.997	281.449	287.372	241.456	322.588	268.079	227.327	221.03	345.467	264.231	289.875	409.861	347.337	358.105	295.681	315.798	278.687	267.796
Gpx2	153.212	164.94	156.835	217.825	308.842	148.021	161.333	206.873	107.427	143.571	241.503	151.341	180.901	153.479	199.961	140.975	187.016	98.8733	111.183	170.647	131.522	133.269	204.513	209.066	227.723	211.844	150.868	140.023	169.054
Gtf2h5	31.3394	28.6158	33.1849	40.486	67.8486	24.2096	23.7609	30.4	24.8896	34.4387	33.3557	27.846	25.2909	15.6086	25.1674	19.7335	32.8051	23.578	23.9468	37.259	30.2462	29.4291	33.2995	36.7032	31.9751	27.5724	33.0513	36.3673	28.4796
H2-Aa	71.3142	66.5847	51.9031	71.9721	107.589	39.7649	38.7176	77.374	46.8986	53.401	56.9887	55.8337	48.3011	47.2577	45.7268	54.3523	54.2917	42.4575	66.9563	76.6118	62.1658	69.7797	114.331	92.7193	72.3592	90.0864	91.0032	80.7147	84.8668
H2-D1	492.682	554.674	499.936	521.467	510.957	350.92	381.283	447.071	304.971	348.355	693.93	505.305	460.129	493.7	495.37	490.522	440.01	360.672	424.399	414.097	451.605	448.787	509.249	536.921	529.613	509.318	572.379	561.73	448.413
H2-Eb1	61.0034	52.5951	54.0165	65.9003	71.258	28.1233	35.5796	61.7697	37.0925	39.1368	61.7261	45.8219	46.1939	39.8206	35.5107	57.6755	53.1207	35.2545	41.9213	61.8477	46.4662	54.6639	76.5536	66.0897	64.1695	58.1538	78.5988	64.8586	61.8399
H2-Q4	27.1811	32.867	28.9671	31.4401	28.0012	15.4174	13.7093	21.0169	17.0688	16.0811	36.534	27.7672	23.8005	30.2763	23.9431	24.0301	23.2281	18.879	22.7392	21.6782	14.7592	16.8565	24.791	33.9728	23.6173	22.6301	28.5344	25.4425	22.5855
H2-Q5	5.70712	5.31284	6.97076	6.03222	8.44234	2.16956	3.27138	3.38784	2.84857	4.11907	7.26194	3.60731	2.55983	4.20346	4.82827	6.03405	5.28872	4.90629	6.10224	4.99343	2.05498	6.19642	7.23948	3.31219	6.96261	3.98304	7.1258	6.00326	6.98988
H2-Q6	17.7171	14.6054	16.4499	16.7786	16.4425	9.27613	8.5588	9.99694	5.98821	6.8144	19.7939	11.5011	14.4539	13.0941	16.0537	20.3708	14.1086	7.08602	15.6659	8.72208	13.2238	16.1381	19.8822	25.587	13.5245	22.644	21.1264	20.5991	13.2709
H2-Q7	16.463	15.3137	18.4667	16.5154	22.2024	6.26156	6.50363	15.017	7.22998	5.93961	16.04	12.5877	13.1234	11.3748	13.9105	18.3702	15.4997	9.30426	14.0548	11.0695	13.6638	13.0688	20.0978	18.2257	15.7048	20.0592	25.6537	18.5502	15.7149
H2-T22	25.2105	21.9588	21.9092	25.8134	21.901	13.9965	15.4712	17.3223	13.804	19.8246	32.9096	27.3501	20.6872	21.6055	24.1919	21.5303	20.5276	16.2099	21.8846	19.1649	21.1748	21.8948	23.3272	20.7811	24.7073	25.7696	23.7339	22.8289	21.009
H2-T23	165.813	173.961	143.416	185.09	171.829	82.8248	103.78	136.931	100.07	92.1858	231.119	209.81	203.33	208.978	193.697	159.109	139.699	115.229	129.453	147.647	142.512	151.187	148.07	163.434	157.111	150.89	205.064	189.96	115.589
H2afx	124.598	149.035	143.482	159.585	231.547	100.161	96.7684	131.565	93.4078	96.0797	247.108	104.333	117.819	102.69	81.6801	118.116	131.927	82.5897	85.0804	112.918	93.4206	110.522	132.487	126.984	111.303	111.31	130.272	106.858	82.8823
H3f3a	76.9314	123.325	104.216	115.563	184.839	80.4723	87.2413	75.6987	97.7593	93.2663	85.5392	87.8827	68.3482	78.5069	60.0212	72.2352	98.1633	88.1877	93.8202	106.716	78.6866	93.2856	127.214	102.903	90.2168	82.3469	121.687	75.6628	88.7245
Hba-a1	61.7208	14.312	14.7441	26.2279	33.0839	7.92487	16.3769	14.8641	9.14343	19.622	41.7372	26.401	25.9987	12.3446	29.1111	23.5548	17.3405	22.3628	10.3684	47.2303	15.2926	19.3767	38.7796	22.4263	85.0612	45.0835	20.4523	43.3269	24.9418
Hba-a2	72.0997	18.4209	18.1036	20.9618	31.6093	12.0734	12.6157	17.9248	7.66434	19.4319	53.9201	28.3387	34.6404	14.3598	13.5198	22.1921	14.5305	20.8086	9.18816	45.6498	30.2967	19.1945	29.5056	20.1977	72.1259	60.1993	16.5262	38.224	23.5561
Hbb-bs	120.811	33.3799	22.6485	36.9606	69.2499	25.9811	23.6355	29.318	20.7047	44.403	101.932	45.7903	47.5943	32.6547	30.6712	49.5663	33.4651	51.2023	25.1492	71.0206	32.544	58.3575	76.4528	42.9012	112.692	67.6563	38.3808	60.2787	55.0068
Helz2	27.7865	32.7222	36.2006	31.1404	23.0979	22.1634	16.7773	23.5369	20.9284	20.8366	45.7691	39.4904	36.9792	41.3375	44.7668	38.0474	32.312	27.4669	30.9075	25.6083	24.0788	26.7976	24.3282	27.8426	30.8011	26.2082	26.4958	30.3678	23.5252
Hint1	345.699	307.486	295.436	364.057	568.059	262.735	289.27	304.981	255.6	310.28	393.974	322.458	331.984	259.844	281.769	329.24	267.648	287.183	262.081	357.976	278.279	318.962	552.535	429.331	383.827	393.945	357.333	330.529	328.838
Hist1h1a	240.282	298.687	263.784	208.908	430.853	222.979	171.362	191.747	153.441	167.37	211.763	167.129	172.542	189.639	152.316	173.314	239.246	168.897	211.923	226.335	173.128	226.872	197.352	224.129	191.844	178.719	213.975	193.31	138.047
Hist1h1b	432.8	558.405	445.734	429.359	870.301	345.064	302.333	382.175	240.169	307.06	632.58	332.03	341.021	303.106	249.238	338.045	446.723	267.767	298.218	378.903	288.975	342.642	376.657	378.226	280.434	303.147	388.204	335.558	198.203
Hist1h2ab	719.313	846.657	780.71	837.303	1532.86	589.729	588.057	749.692	441.776	561.24	1232.9	477.721	615.464	475.959	420.432	596.174	750.044	429.48	459.441	582.68	514.746	569.481	675.479	751.927	712.771	612.833	672.755	615.275	472.993
Hist1h2ac	418.656	415.632	483.6	522.435	927.897	334.044	370.089	468.691	270.339	364.27	674.048	315.921	360.984	374.774	268.908	411.018	444.452	315.104	326.394	414.945	348.192	453.729	437.029	456.465	432.094	464.723	434.617	392.181	294.37
Hist1h2ad	248.072	322.837	338.566	313.778	633.23	199.529	228.905	301.577	149.121	239.118	416.027	198.782	212.732	190.272	161.887	242.783	305.388	153.122	194.653	244.69	188.142	250.839	256.351	289.527	265.407	255.498	283.27	215.403	160.007
Hist1h2ae	319.035	347.222	385.479	372.7	709.874	249.943	252.633	379.615	188.237	263.812	507.513	259.477	271.378	264.674	214.284	301.888	316.907	213.295	232.488	305.746	240.156	305.908	285.627	302.447	329.977	294.715	297.272	272.796	195.943
Hist1h2af	333.9	322.606	353.863	355.427	610.284	233.994	302.062	322.511	196.202	274.687	615.95	253.624	262.929	241.446	203.199	273.54	314.874	202.624	229.472	300.748	242.056	294.473	321.625	295.663	316.334	284.185	285.757	285.193	180.22
Hist1h2ag	474.604	581.118	519.974	572.974	1104.45	371.416	390.527	526.451	269.115	378.316	714.055	335.164	374.589	341.26	277.274	405.586	465.17	283.161	297.841	445.584	329.152	401.84	414.921	499.762	460.904	396.611	439.421	397.037	265.961
Hist1h2ah	275.4	313.135	373.916	302.46	648.058	228.671	198.833	295.506	154.909	244.943	416.389	182.866	197.228	193.536	161.28	242.705	310.203	170.234	200.173	255.656	172.167	243.388	239.183	290.286	273.331	261.894	257.527	240.532	181.383
Hist1h2ai	347.281	438.184	465.757	435.971	820.297	287.524	263.568	378.48	203.995	308.971	592.056	245.736	298.847	251.976	212.29	306.014	373.553	217.639	251.338	340.13	254.939	321.102	295.1	366.879	348.516	355.257	335.256	296.285	201.451
Hist1h2ak	484.622	498.155	549.04	578.647	1136.94	391.556	375.715	647.443	246.923	348.575	1275.64	408.211	458.52	431.749	352.775	509.257	571.029	294.714	361.729	544.168	362.394	460.283	449.563	500.026	526.98	422.701	463.702	426.14	301.401
Hist1h2an	209.878	221.844	260.182	245.621	434.868	152.24	162.157	245.796	97.5437	133.543	377.78	162.356	178.418	168.261	145.256	201.347	205.778	125.828	145.915	187.42	152.904	188.006	189.448	271.194	200.844	212.77	200.194	156.008	138.703
Hist1h2ao	310.103	305.921	328.883	367.951	614.9	251.212	234.147	327.948	158.767	228.999	487.29	259.412	298.937	271.648	200.683	297.884	325.712	199.175	230.368	291.165	227.055	313.62	272.639	294.347	287.452	267.05	264.948	272.629	210.015
Hist1h2ap	428.448	414.586	435.44	496.838	874.017	343.242	319.033	434.337	215.535	328.331	672.392	337.263	366.821	332.834	261.766	404.742	419.197	256.723	295.173	389.454	273.569	396.005	347.923	367.718	414.781	429.339	346.134	386.064	270.603
Hist1h2bb	452.113	710.361	705.403	646.747	1297.75	357.506	350.492	460.823	330.231	451.317	846.681	335.129	360.109	362.786	231.98	398.921	536.015	331.874	397.564	448.904	359.856	423.803	426.556	472.09	398.92	407.016	514.72	359.667	329.359
Hist1h2bc	768.034	809.884	748.157	915.943	1478.43	645.958	681.424	775.092	644.585	727.374	1173.49	624.368	672.26	645.689	559.955	781.096	724.906	551.812	582.371	796.588	634.225	730.584	921.421	909.092	897.229	714.391	866.87	799.342	684.724
Hist1h2be	701.605	822.437	804.7	902.356	1567.58	544.531	548.631	759.022	477.363	580.994	1243.45	650.565	675.474	525.39	470.756	635.067	692.662	426.38	493.39	767.185	607.202	683.902	866.975	799.442	810.273	695.941	775.647	710.78	499.419
Hist1h2bg	510.767	486.516	504.893	599.498	923.516	386.506	371.98	508.499	348.215	384.951	818.98	369.439	436.559	346.517	280.407	459.625	470.076	234.933	327.276	463.452	351.74	420.02	497.84	532.861	509.643	348.172	459.408	419.056	307.844
Hist1h2bh	204.295	238.204	220.065	259.468	387.301	173.012	156.869	211.177	119.457	170.064	364.59	203.719	194.284	191.19	131.414	204.294	241.269	112.994	148.032	222.527	175.521	190.285	181.236	292.519	225.962	180.32	220.316	201.928	138.106
Hist1h2bj	200.872	241.978	233.778	285.646	442.956	173.771	136.619	206.761	134.99	133.695	356.709	150	182.739	148.332	125.283	201.126	217.096	125.807	140.84	198.509	134.335	179.761	160.503	205.509	200.038	174.925	174.427	163.725	125.481
Hist1h2bk	284.43	340.956	379.088	355.279	639.191	221.742	200.549	253.355	185.51	240.116	406.16	177.512	256.794	178.756	143.443	251.118	275.154	145.94	155.942	271.556	187.4	226.24	254.451	310.082	282.892	227.541	290.92	223.685	169.544
Hist1h2bl	236.069	234.928	247.618	309.711	487.369	193.87	171.226	266.673	165.327	168.031	453.933	192.78	227.543	180.793	151.675	237.587	274.78	163.986	154.078	217.736	161.273	200.565	211.994	242.037	230.749	182.159	220.603	187.92	163.087
Hist1h2bm	316.915	365.087	359.492	344.553	687.447	274.363	250.761	286.374	191.159	259.471	495.395	266.967	284.435	256.74	237.684	292.514	320.345	173.054	236.664	327.808	243.953	281.692	293.147	379.777	309.354	310.176	300.167	283.504	194.29
Hist1h2bn	400.26	547.813	548.729	585.307	956.875	362.839	306.89	477.595	294.364	394.872	805.534	326.164	395.004	333.48	267.051	422.62	464.116	256.716	296.303	446.193	360.664	352.437	360.067	521.983	437.832	423.169	472.277	376.813	256.758
Hist1h2bp	146.043	173.34	181.156	216.727	307.871	128.17	100.046	174.031	99.8364	151.316	228.399	122.393	162.709	125.984	84.4005	169.06	176.538	101.16	84.3411	165.47	117.152	145.204	156.414	155.318	171.592	146.562	175.92	119.996	113.843
Hist1h2bq	311.185	377.511	389.541	437.568	695.679	277.377	234.187	361.358	231.176	275.098	559.433	211.887	281.954	257.046	212.467	306.54	336.642	181.857	216.819	332.851	253.12	240.394	353.757	330.614	332.445	312.595	318.724	270.254	228.188
Hist1h2br	348.901	382.998	387.22	416.285	690.458	272.626	222.028	342.641	240.487	247.545	578.935	250.077	292.419	251.417	208.816	328.085	359.578	230.931	243.496	350.116	260.944	314.531	312.409	397.211	325.586	369.25	337.136	284.413	232.69
Hist1h3a	198.631	218.739	229.988	253.326	435.382	192.827	158.274	257.942	151.986	217.29	395.477	247.529	233.697	191.396	189.88	208.008	230.188	138.856	162.03	212.59	167.495	205.393	267.356	230.711	244.107	187.835	215.106	238.118	158.528
Hist1h3b	788.571	928.657	805.616	913.029	1813.81	634.371	649.696	793.021	455.755	623.99	1228.22	602.292	623.006	510.194	462.147	620.791	753.59	445.948	507.018	675.311	557.121	715.289	866.337	654.298	783.618	705.261	823.316	701.988	466.857
Hist1h3c	721.109	740.587	729.275	795.093	1499.53	560.554	618.463	740.93	404.671	549.417	1315.66	593.215	617.719	540.079	477.21	586.191	747.382	395.107	450.588	605.913	526.098	628.925	768.768	673.496	687	577.586	768.373	674.555	434.228
Hist1h3d	369.888	409.203	369.287	427.271	763.589	340.463	336.819	411.191	237.655	293.417	602.471	334.451	334.269	267.163	261.907	322.747	382.247	227.814	285.119	324.981	292.097	350.049	425.679	365.271	433.03	335.379	377.61	399.622	237.817
Hist1h3e	835.343	1098.81	947.482	1058.46	1989.79	652.31	744.133	893.645	543.229	699.391	1189.69	636.367	718.513	592.722	534.854	697.374	840.666	512.094	581.273	830.655	607.952	744.037	924.779	719.295	896.302	735.98	897.208	765.369	568.329
Hist1h3f	439.74	445.353	432.439	486.379	943.049	317.433	329.397	437.488	272.412	330.279	705.443	328.675	334.676	310.57	262.07	363.764	441.775	262.966	307.743	359.706	324.545	365.429	487.676	392.278	417.129	376.243	418.971	381.471	266.84
Hist1h3g	191.215	181.466	189.443	233.759	377.331	129.901	155.238	192.973	100.268	144.957	266.178	158.835	211.469	152.191	154.158	186.276	194.644	124.249	146.517	160.997	160.108	145.911	210.059	145.193	206.653	167.482	160.331	178.009	91.8879
Hist1h3h	637.797	1031.56	960.724	874.836	1951.66	552.375	640.276	715.41	437.737	631.394	1033.31	507.233	609.27	434.65	379.345	539.13	767.618	422.738	451.27	679.014	510.364	604.865	791.7	707.237	738.46	526.927	803.144	656.65	433.292
Hist1h3i	389.318	390.723	382.732	398.778	735.375	315.593	332.12	397.611	239.163	287.829	564.261	306.122	345.464	274.29	286.326	329.02	427.673	231.842	202.568	354.312	272.581	349.653	416.036	369.849	417.95	360.282	395.615	340.536	204.926
Hist1h4a	658.33	526.515	547.799	652.262	1047.53	474.962	518.88	592.518	289.032	425.727	1021.87	547.629	516.142	498.266	399.833	496.512	559.99	343.543	374.688	562.913	430.849	574.465	617.459	653.018	595.459	619.853	559.405	509.267	351.432
Hist1h4b	648.326	641.917	540.111	831.055	1210.14	466.277	497.744	682.3	338.146	473.745	876.129	612.989	662.486	503.018	502.413	601.565	631.169	314.271	374.164	562.896	430.887	577.118	698.053	685.263	606.075	582.212	605.662	561.334	357.124
Hist1h4c	2934.16	3347.77	2853.67	3324.1	6466.79	2205.28	2609.67	2613.65	1948.76	2506.68	3532.67	2362.68	2228.95	1893.52	1660.66	2122.4	2456.88	1833.36	2074.24	2949.1	2023.39	2792.53	3694.87	3099.73	2951.92	2674.24	3054.86	2619.37	2205.43
Hist1h4d	3082.33	3592.72	3434.74	3751.64	7414.68	2153.57	2598.39	2916.83	1879.23	2708.03	4213.97	2495.58	2452.97	1955.13	1919.15	2242.58	2745.52	1687.72	2140.06	3127.48	2180.24	2778.15	3813.1	2973.88	3122.08	2465.97	3577.35	2911.39	2470.91
Hist1h4f	2091.4	1755.32	1474.49	2194.39	3701.77	1413.93	1673.55	2111.13	915.49	1474.31	3080.7	1643.73	1578.15	1321.58	1217.9	1500.75	1766.64	993.793	1227.56	1995.6	1337.86	1802.56	2273.21	1665.05	2225.71	1643.92	2037.5	1912.42	1356.45
Hist1h4h	1983.3	2022.38	1967.18	2518.27	4466.01	1180.98	1402.88	1844.28	1220.41	1850.57	2882.86	1547.94	1526.47	1506.56	985.12	1575.22	1835.2	1242.1	1309.91	2190.33	1388.47	1956.97	2262.83	2146.56	1844.54	1977.2	2214.98	1557.98	1333.14
Hist1h4i	144.197	117.461	122.861	207.905	280.26	86.9777	115.334	154.12	66.8146	121.295	183.158	127.395	116.996	119.479	68.6004	156.037	122.926	73.4421	95.4636	128.952	77.824	139.674	157.551	141.635	159.387	151.559	159.119	116.298	107.386
Hist1h4j	952.696	938.941	819.162	1099.41	2035.85	819.409	895.657	1076.61	613.395	818.062	1659.93	813.356	814.231	731.523	687.172	815.615	886.461	540.999	673.056	958.882	725.038	945.083	1129.01	1000.89	972.341	935.92	1057.73	923.999	710.427
Hist1h4k	564.028	629.363	603.599	753.714	1395.86	453.714	493.668	628.941	374.671	565.102	770.054	502.115	579.284	413.913	383.183	497.167	612.001	332.624	451.934	636.321	478.784	563.916	624.921	629.781	623.886	580.956	629.745	572.797	456.128
Hist1h4m	1319.34	1423.69	1270.24	1625.96	2814.88	1015.89	1087.98	1113.58	795.828	1177.53	1592.53	1048.3	1119.46	877.717	817.225	1070.72	1237.83	721.377	917.755	1458.35	873.778	1153.57	1581.41	1166.28	1403.84	1163.64	1427.16	1081.57	885.652
Hist1h4n	1075.99	902.685	848.728	1066.58	2006.74	734.573	802.383	931.434	554.308	806.13	1240.95	767.249	874.047	735.344	583.419	852.347	853.332	571.726	674.47	1082.9	672.812	912.294	1122.57	1063.22	1091.05	881.595	1024.05	938.923	689.754
Hist2h2aa1	700.023	845.04	703.499	864.02	1508.13	675.547	658.944	818.846	555.354	644.177	1570.14	668.331	668.995	543.142	573.496	650.124	659.783	407.484	525.508	676.384	558.6	630.19	1001.39	876.732	823.401	726.454	808.303	784.131	562.622
Hist2h2aa2	657.923	806.138	670.543	790.493	1339.63	653.223	643.906	765.636	529.742	587.42	1402.86	638.36	618.937	518.007	547.734	603.857	641.536	410.305	485.368	682.546	510.656	622.716	932.15	838.404	775.68	721.383	767.201	727.32	540.824
Hist2h2ab	59.7996	82.1594	68.1611	76.3704	171.698	44.2455	48.8554	58.985	65.9794	65.5792	87.0893	36.67	46.2219	49.0227	29.1393	49.2395	61.5784	39.0798	46.2761	58.7641	32.9321	54.3529	67.1625	71.2269	56.0942	68.4529	72.806	64.661	51.4472
Hist2h2ac	330.169	350.416	350.819	415.749	700.252	313.3	270.573	371.176	239.205	289.535	567.139	328.875	302.767	246.872	240.145	310.175	339.755	212.149	271.449	294.178	240.754	287.265	404.903	456.462	319.325	341.52	341.531	343.096	245.485
Hist2h2bb	335.8	432.152	370.014	392.671	773.246	305.608	254.378	306.659	188.31	283.562	416.465	238.9	267.052	194.785	197.812	256.8	383.38	204.349	263.622	314.292	262.465	278.556	344.882	357.145	336.488	273.721	290.97	308.427	216.321
Hist2h3b	418.023	439.148	396.128	462.292	874.821	340.992	312.328	402.24	205.629	308.498	727.846	326.097	328.83	269.807	257.02	299.568	454.95	259.669	262.033	363.78	277.192	271.679	383.796	364.9	424.651	420.931	309.255	320.363	216.968
Hist2h3c1	279.189	317.805	264.061	304.774	464.572	289.277	237.303	300.427	170.2	216.72	450.398	230.684	243.382	224.945	168.836	219.863	313.587	176.068	173.215	214.114	206.359	211.358	232.798	261.626	296.19	303.481	210.653	229.633	158.517
Hist2h3c2	291.985	305.952	266.767	328.256	469.696	278.542	250.346	298.613	147.91	222.293	469.741	213.034	260.054	228.243	197.027	227.752	318.101	195.762	178.823	240.124	207.389	229.532	241.971	284.385	280.659	294.506	193.871	236.945	154.612
Hist2h4	929.54	1140.11	965.325	1128.1	2184.32	428.714	571.99	742.694	396.75	730.24	1333.24	654.436	666.649	497.418	403.941	578.005	934.838	399.269	510.446	911.401	606.11	804.509	853.799	696.049	863.705	608.847	1064.87	763.401	482.065
Hist3h2a	159.166	125.329	146.102	179.016	275.554	94.6141	107.08	137.788	67.6398	110.691	225.517	120.903	135.645	92.7342	99.0742	120.787	147.797	95.5741	108.598	166.824	113.927	116.717	174.882	147.329	168.105	160.343	143.171	143.71	91.7077
Hist4h4	272.608	395	396.629	372.08	628.164	228.238	239.603	240.582	244.399	281.015	497.79	243.684	250.284	305.794	193.213	248.082	303.051	233.694	225.213	356.997	262.58	287.793	315.79	266.936	198.946	256.542	315.186	217.978	183.123
Hoxd13	11.4105	8.60264	5.12134	18.7508	12.06	3.6178	7.24727	9.38523	5.70863	6.87551	3.21956	5.51401	9.4713	8.23274	1.65906	3.27189	1.75255	6.17475	6.75841	7.03543	3.47158	8.41545	16.2842	5.53738	19.517	7.45971	10.7323	1.81957	9.93051
Hspa1a	47.5216	78.6758	25.9836	65.4432	50.1892	25.1217	25.1211	34.0134	64.4252	19.9542	44.8314	29.657	42.4844	58.2818	69.3552	20.3929	27.1751	11.3126	23.8233	28.1643	18.5231	19.8268	20.2911	20.1819	30.2319	18.1676	22.8037	22.4561	31.0003
Hspa1b	91.6709	142.85	39.0688	118.954	83.711	45.1642	49.0269	58.163	121.591	35.6491	89.8242	55.7419	70.2512	101.668	122.795	32.6702	45.8048	26.242	44.1288	48.1397	36.7194	34.6367	40.0469	38.2385	55.9563	38.9788	43.4685	43.0073	51.1928
Hspb1	49.0339	21.5184	35.3727	48.2876	83.91	23.7827	45.2113	46.9118	19.7906	34.4693	86.32	37.9712	41.7724	45.0101	35.3467	49.3495	47.7986	37.9385	40.516	76.6586	49.8869	42.2332	48.1502	31.5626	65.0772	55.2979	44.2263	34.9837	42.9361
Id3	86.065	88.9265	77.9647	78.368	95.6655	65.9644	73.1741	66.7141	57.1973	61.706	105.187	79.7845	66.3225	68.2427	69.2449	86.2622	71.3061	71.9058	74.8971	85.0079	85.2284	85.1301	89.5094	93.1438	88.4326	88.5787	78.5711	84.1829	92.2215
Ifi27	25.4687	24.3021	27.1015	32.0583	43.9562	15.8701	21.2775	17.424	17.0346	23.8336	19.7074	26.2311	34.7761	27.1361	26.5285	20.7685	25.758	23.4631	20.3455	25.8837	21.7006	33.2886	37.3827	34.2238	37.1177	27.6429	29.0621	33.9238	23.2659
Ifi27l2b	246.319	264.491	221.783	274.126	359.024	100.461	95.927	115.096	102.85	117.642	359.927	293.306	262.173	282.991	360.105	184.79	255.258	120.056	210.406	181.347	175.499	250.188	194.113	198.154	232.173	207.795	199.591	229.652	177.717
Ifi47	10.4342	22.7696	13.652	19.1257	16.9706	5.82692	5.71246	7.21299	6.54927	3.88933	22.8343	17.8037	22.6188	15.4654	17.8438	12.6803	12.7874	8.75952	18.8285	17.086	13.4644	14.773	16.4726	16.8735	16.8582	9.95056	22.2204	26.3166	12.5266
Ifih1	16.7467	16.9412	14.8142	15.7459	15.9598	9.79185	7.7827	10.2319	9.38207	11.9591	17.2834	17.8791	18.1744	16.8623	15.343	13.4479	12.4205	11.329	15.7087	14.1605	13.0952	15.6669	13.1566	11.0929	15.7091	12.4259	15.6059	15.2663	13.6676
Ifit1	26.7464	34.6775	19.3988	33.8019	27.3248	6.68466	4.68213	6.08615	4.52203	3.41318	36.8375	40.0012	32.1729	44.2116	43.8941	18.9546	21.5827	14.1949	28.0689	30.8211	23.6508	20.0067	16.4996	14.8914	24.8529	14.6627	23.4568	32.8826	15.0382
Ifit1bl1	121.166	110.599	86.3821	120.446	132.784	41.5995	53.4795	68.8156	50.982	64.2007	95.9955	115.511	124.767	121.871	127.503	77.1363	76.8543	57.8303	142.34	119.43	67.873	103.532	101.243	93.811	114.758	97.9277	106.055	95.0584	102.682
Ifit2	7.62086	9.12992	4.46585	6.58956	6.41343	2.09028	1.97966	3.20795	2.81122	2.23521	6.43508	7.37848	9.60772	8.80311	10.3993	3.28982	4.67747	2.29485	6.0604	6.11563	4.73293	3.03582	2.86087	4.54632	3.98427	4.15631	3.87199	5.28819	2.74732
Ifit3	9.28395	13.6096	7.52476	9.82664	9.91746	3.68825	1.62567	2.63432	2.86753	2.04243	15.859	12.328	12.7631	12.9035	15.2614	5.395	6.05351	5.49677	10.2838	8.83355	6.22367	7.91853	6.01728	5.59736	9.3067	8.97118	7.6549	8.87407	6.19285
Ifitm3	54.9567	45.6358	43.0205	60.8679	73.6877	30.0112	23.9612	38.3999	28.4775	20.8522	61.2623	48.648	52.7052	39.2274	56.5096	39.7404	54.7664	27.3824	30.5367	50.5546	39.5402	43.9965	44.5028	35.4065	48.387	47.0179	37.6978	37.9856	36.3385
Igtp	13.382	19.768	13.1474	20.4343	16.4094	3.84449	2.40602	9.51408	3.94442	5.54167	20.4395	16.3774	31.6665	13.5522	20.4156	8.30611	11.934	5.87567	12.3809	10.3867	10.0023	8.6636	10.7564	10.0988	11.7678	8.39208	17.2929	16.6014	10.2986
Iigp1	7.67005	10.9155	8.48808	10.9816	9.35787	2.09111	1.37667	4.9543	1.95308	0.691194	7.70665	4.94902	13.972	5.94348	6.67189	5.23563	6.98902	2.07051	5.19947	3.86647	1.71872	4.21903	5.24325	5.68428	5.44348	1.51937	11.7157	7.78008	5.12989
Il10ra	4.30472	2.396	3.40411	3.44782	3.35984	2.38411	2.32997	2.3486	1.56176	1.75429	4.71524	2.63232	2.24825	2.30205	2.40455	2.78513	2.61838	1.84021	2.76319	2.76236	2.64537	2.52124	2.47376	1.87181	2.38038	2.05857	2.70426	2.10748	3.36874
Irf7	67.3531	63.6196	62.6274	68.1136	66.8006	22.6441	31.9626	21.2462	29.3228	25.106	82.6684	96.5415	68.4987	102.06	120.22	61.2212	49.4269	48.9747	67.9783	49.5697	77.5742	69.9807	46.3661	41.458	77.9337	49.1848	60.5532	87.0417	47.1767
Irf9	16.2469	17.657	16.129	20.5485	21.601	7.9244	6.68195	10.5982	9.71064	8.39014	19.1774	18.0168	20.1417	25.5177	20.4636	16.7116	13.5511	10.3035	16.2269	19.034	16.9076	15.5861	16.57	14.5243	17.7302	15.0735	15.8996	17.6751	14.6331
Irgm1	35.0295	49.4718	31.8697	48.2554	44.1773	14.61	13.0782	18.0404	17.6219	14.6624	42.1853	40.9676	57.98	43.9859	46.7835	21.8209	32.1495	20.0586	32.0916	30.0711	24.582	29.3897	31.3672	32.6978	27.2516	25.6689	37.3758	34.6682	27.7171
Irgm2	14.6559	17.9597	15.5472	18.7797	14.4857	5.60679	3.68815	7.48418	4.40722	5.60953	13.4075	14.9681	30.0879	15.2564	19.4961	9.79946	13.3691	7.3983	14.2707	12.0645	10.7866	10.2806	10.331	7.44047	12.329	7.65383	14.3025	16.3442	11.2758
Isg15	45.7928	61.906	29.6847	67.4143	60.9635	4.09956	5.09145	11.4776	5.89188	3.84943	114.273	59.9547	65.1405	94.6944	94.6791	28.4561	43.6644	11.8199	40.8146	40.9109	27.5417	28.3239	19.0893	25.1516	61.4576	28.7192	27.9733	51.3108	19.6023
Krt20	359.1	394.7	397.618	348.864	415.008	265.99	287.995	282.691	241.694	350.833	363.171	332.859	368.623	286.158	318.437	420.52	455.736	276.161	364.845	391.312	340.917	403.192	398.475	358.507	492.048	377.152	465.059	530.323	401.558
Lap3	22.1943	24.3889	17.3866	21.6428	19.4979	16.301	14.1956	17.6124	13.2729	14.2628	15.6074	14.5101	22.1163	15.2855	17.354	14.0156	17.3826	14.5375	14.4675	17.8296	14.0882	16.1409	16.8305	22.7659	18.3364	15.2561	20.2686	18.7064	18.2327
Lgals3bp	92.3642	116.299	101.868	134.449	109.028	49.9514	42.6237	48.3208	35.3114	42.5501	132.082	153.07	128.587	143.999	159.559	93.3394	100.903	66.8644	92.9507	70.048	91.6085	81.4549	72.5828	74.1793	119.683	80.402	89.6869	117.294	63.7048
Lgals9	36.0453	44.5365	34.7433	52.6017	37.6515	17.5646	18.9881	18.4492	20.3923	17.2087	69.773	55.6741	49.3408	68.1669	65.2767	43.2589	34.5785	28.1012	36.8329	46.0252	33.8368	32.9073	26.6233	32.5417	42.4016	26.9996	36.8474	42.2054	23.2868
LOC102635048	158.471	127.532	147.163	229.168	251.42	97.5062	155.521	167.136	107.969	177.529	213.319	148.897	145.81	147.044	104.889	140.304	126.297	150.409	127.28	175.741	131.825	156.288	173.362	180.23	178.852	161.047	152.492	111.077	135.948
LOC102638448	119.201	140.672	130.967	112.422	223.73	88.6414	98.3541	95.012	118.904	145.758	138.445	68.6855	90.6559	82.9975	67.4767	70.1102	90.9135	95.5776	112.028	159.201	83.0728	118.072	124.59	130.42	86.8366	125.412	130.043	78.4761	120.236
LOC105244208	511.033	489.691	346.297	423.323	746.875	404.949	438.624	341.195	307.287	355.203	625.871	345.927	363.612	281.194	312.027	262.68	352.478	316.291	410.086	504.779	317.046	383.887	582.98	405.945	400.721	376.938	357.478	300.787	318.83
LOC108167755	123.131	26.2706	15.8307	5.34418	1.74434	16.1666	0	10.7764	605.499	10.113	10.3331	11.7031	0	8.43291	4.89088	4.06969	9.73279	0	4.67162	4.89986	5.6733	8.93392	1.57253	5.56238	8.39298	0	13.6887	0	8.1546
LOC108168233	150.26	162.453	150.15	158.345	317.773	117.462	119.89	100.437	104.477	138.446	107.074	129.9	133.197	122.025	100.254	112.486	114.75	119.306	156.694	196.402	137.383	152.481	184.079	130.374	134.625	131.135	158.269	121.857	126.646
Ly6a	162.465	139.519	123.199	187.694	189.122	68.4933	52.4712	128.322	42.1323	54.4514	147.462	91.345	157.761	125.892	126.173	106.327	118.442	79.636	133.088	99.7863	81.7699	114.45	122.37	75.93	157.886	112.58	109.704	91.8754	87.4188
Ly6c2	11.1709	6.23568	8.53274	16.5281	26.471	1.52893	10.9079	8.6126	6.71303	9.42441	11.4622	9.87153	13.7505	6.21354	3.49014	12.6478	12.1474	6.87009	5.50819	14.7071	7.7625	11.2838	13.5386	10.3961	9.90823	8.74908	11.5768	9.87867	16.5252
Ly6e	96.9036	100.19	88.5947	108.587	101.463	60.5621	56.2957	66.7561	39.9696	77.3552	105.999	92.3035	102.388	76.2369	119.094	83.9092	111.34	63.0279	77.4881	91.0672	82.9275	75.9124	60.9283	68.1673	108.465	106.098	65.7897	77.6413	60.1839
Lyz2	88.488	79.5702	84.5722	84.3501	149.516	49.0634	59.873	68.6239	68.5169	75.4387	69.2853	63.3679	59.2925	57.6382	50.1084	76.4608	63.1266	63.4371	79.7217	122.492	58.3133	94.7472	129.182	91.1065	94.6747	87.6425	95.6298	96.637	95.503
Mal	3.12892	6.21566	5.18181	1.79383	2.67577	9.39528	6.00622	4.94003	4.45108	8.61706	6.00392	7.02168	5.36883	5.9844	6.33931	5.18486	5.39349	5.80739	7.9004	8.56707	7.63407	9.02193	5.89294	14.7591	8.0259	4.71813	5.64535	12.0613	4.59345
Map1lc3b	37.1221	34.3985	34.7615	43.449	50.0502	24.963	30.9987	31.5946	26.4466	32.3201	35.5397	35.9829	32.5496	29.7571	28.1299	32.4421	34.555	35.3727	29.3894	51.2993	38.934	33.9344	39.2524	30.7709	40.4797	41.7666	39.2945	33.4408	23.7503
Marcksl1-ps4	45.9295	55.289	51.543	36.9272	29.0041	75.726	72.968	46.2573	68.2613	62.3543	55.2862	60.1856	43.3624	60.0416	79.0939	44.7493	49.4614	69.7633	49.0317	39.0237	68.2171	64.2666	46.1625	48.6388	45.5326	44.0368	55.0325	94.3592	54.2691
Mcm5	9.2942	9.56523	11.987	10.2918	9.03331	8.60943	7.58934	7.37189	4.60133	5.87654	9.0659	7.70133	9.49427	8.19243	12.2135	8.90528	10.398	4.39978	7.82722	6.20295	6.47408	6.72331	6.93888	8.722	10.1401	8.07011	7.05086	7.00329	7.61207
Mgll	24.707	27.725	28.5988	22.4846	21.5577	39.5875	34.8187	29.9916	33.3364	32.3488	29.3575	31.2265	27.2489	32.5501	36.2547	35.1159	25.7489	26.6205	29.3229	29.7552	32.4798	33.2698	23.7443	34.7046	28.6804	21.8515	25.6179	44.1903	27.2391
Mir6236	3406.98	1044.36	245.016	252.331	388.71	703.315	84.9608	395.617	16630.1	406.282	293.073	182.011	358.874	198.663	489.866	242.962	295.067	66.191	210.684	389.15	251.814	73.0499	218.815	293.753	234.019	386.059	145.587	43.2046	191.956
Mir703	2844.71	4277.01	3031.96	4244.54	4978.84	3724.74	2536.1	1736.35	2655.64	2557.59	976.492	1934.71	2067.66	1456.52	1499.11	1118.24	3095.26	2327.37	2121.18	2719.65	2268.33	2632.45	2074.62	3691.5	2655.77	2515.27	4133.67	2210.03	2128.78
Mlkl	8.03154	12.0079	10.6486	7.17008	7.79696	5.01635	6.55771	5.41001	6.45791	4.91688	16.7506	9.11028	10.3236	9.57764	10.2311	8.22263	10.421	6.35642	6.30415	6.73301	7.77129	9.03869	7.44104	8.22863	8.69628	8.71672	11.2521	11.283	7.09991
Mptx1	3959.2	1519.89	1258.32	6759.91	5332.07	842.538	3020.89	3184.03	1252.47	1344.29	4075.04	454.623	2212.97	2111.57	4620.02	756.383	5454.62	1331.78	1533.83	1800.96	1126.05	1108.63	1560.06	1523.66	885.732	4385.17	901.959	471.893	3881.59
Mptx2	44.4904	11.7627	21.2233	109.383	77.3854	15.1049	42.5337	60.6548	21.8651	23.4261	32.8615	4.47018	32.723	33.609	98.9595	12.0785	69.6839	23.0573	29.6217	31.7301	20.0607	33.6332	20.8291	21.6668	11.4083	83.3464	15.4481	10.7586	90.7355
Mrc1	4.88167	3.65291	3.23319	4.8172	6.70496	2.92865	3.12978	3.46136	2.98798	3.28616	3.78418	3.41825	3.92491	2.70372	3.38618	3.81146	3.95545	2.90327	4.05778	5.04066	3.39063	5.12401	6.27693	4.85144	4.12982	4.5078	4.29033	3.95295	4.72595
Mrpl28	40.5316	56.4686	58.1564	62.813	87.2219	46.1881	39.7046	48.0911	43.2555	42.8045	74.407	45.2628	42.7526	42.2404	44.2525	51.3727	45.292	41.7209	30.6786	53.1715	41.1604	51.368	54.485	52.1458	46.0098	48.3718	58.8251	43.9093	43.5351
Mrps21	50.183	70.7042	81.4975	86.4445	166.934	50.7425	66.1326	63.8181	37.3042	55.3439	77.3043	75.8878	54.2404	38.1376	95.8956	51.9381	78.5543	40.4266	37.156	89.2561	57.5871	68.1712	91.0447	69.7824	76.6983	88.6191	94.0308	82.7412	51.4417
Mt1	25.3152	30.9452	20.9345	24.6032	20.1026	28.4365	32.4045	43.6716	38.9299	58.2286	25.0202	20.7477	21.5994	27.5269	25.7733	21.5464	25.3799	27.8045	38.6908	36.2448	39.4079	41.9909	29.4533	30.7241	42.8337	50.3408	22.0224	45.5139	31.822
Mt2	15.0595	20.1887	19.6077	22.713	9.35638	32.5491	32.993	19.5273	31.1678	36.046	14.623	6.64639	11.7368	19.4558	5.49676	23.7186	12.7657	30.7149	17.5902	47.5761	27.7246	34.1522	11.8876	32.8518	34.6263	33.559	28.1903	28.6378	42.0652
Mvk	12.451	13.3309	13.4845	16.1179	13.2902	11.5818	8.97697	8.99053	7.08392	10.0645	18.7597	10.2925	12.4539	10.0449	11.3804	12.9634	10.3088	8.51345	9.42952	9.13432	6.8721	9.86119	11.7152	13.2196	14.694	12.4677	8.98769	9.36371	8.19898
Nampt	11.4767	14.7719	12.7052	13.468	14.7527	10.3273	8.98111	8.44156	10.9356	9.76333	12.8274	10.8248	13.3954	12.8583	12.6387	11.4933	10.4139	10.0406	12.6136	12.061	12.534	11.1137	11.3832	12.577	10.6341	7.18636	12.2213	12.7075	11.4909
Nbea	1.99295	2.00891	2.55653	1.74483	1.55857	3.69941	2.90757	2.87947	3.64708	2.49994	2.92142	2.9049	2.74989	3.0393	2.71472	2.11047	2.25779	3.46296	3.00127	2.04064	2.47129	3.35276	2.22765	2.89425	1.93469	2.14433	2.01032	2.55961	2.64442
Nceh1	8.4973	11.5989	12.4098	8.77116	9.27049	13.3387	15.9914	9.73486	18.1017	12.6527	10.9857	18.8322	12.074	14.8837	15.344	10.7613	9.93233	16.2074	13.4855	12.6374	18.425	16.7908	8.02316	15.8787	10.1499	11.1834	16.0726	20.9047	12.5474
Ndufa6	172.201	212.716	201.79	229.968	414.551	151.42	134.33	161.183	174.719	196.893	202.753	133.163	176.201	119.951	98.9293	141.39	153.023	149.406	180.738	256.584	116.965	174.783	233.806	187.126	183.078	201.423	186.852	145.206	211.788
Oas1a	44.8497	37.7572	34.2902	49.5421	43.6163	16.5496	21.042	23.6691	17.3779	20.7627	56.3526	38.646	44.9337	52.4146	45.2321	29.3086	37.2046	22.7604	35.9863	33.0188	25.0917	35.797	26.6895	28.719	42.3897	32.3358	33.4094	40.2834	26.0005
Oas1g	20.5234	21.503	17.7407	25.5679	23.7059	9.96283	10.9622	14.6356	8.47319	12.4761	31.4607	23.9847	24.3057	31.1331	34.1362	18.0255	20.8196	15.0258	23.2332	18.0344	17.5306	20.1326	17.3262	15.2848	25.7431	20.0201	18.7776	24.8132	19.1023
Oas2	7.08779	10.2282	7.79258	10.6935	8.13614	1.5436	0.686831	1.31366	0.492949	0.889124	19.9833	10.244	11.6068	13.6757	22.113	6.93573	8.80126	4.61868	12.0868	4.77305	4.329	6.1083	3.89839	7.06433	10.2683	5.52219	5.20055	6.15877	3.15562
Oas3	10.3189	11.2113	10.6613	13.4594	8.76586	1.79255	0.98803	1.24564	1.2997	1.136	18.2748	16.2191	15.3245	18.2386	23.3143	9.05687	10.6804	3.84144	11.2535	4.52067	7.29567	8.17272	6.27644	8.51336	12.231	5.27978	9.46072	13.2265	4.71042
Oasl1	18.3958	23.9826	20.7578	26.4537	26.4923	9.43175	7.60806	10.2593	7.78719	9.55533	26.6215	23.1624	23.3154	31.1177	28.7774	21.4772	22.0913	8.87381	22.5821	20.6611	17.0449	15.0746	17.1606	13.6557	25.8494	15.0912	21.7398	22.0549	14.658
Oasl2	41.8885	50.117	39.4149	56.3116	50.5467	7.68897	5.35223	7.97307	5.51222	4.77068	54.9883	66.0819	57.3046	74.5843	88.2715	29.63	42.5157	18.4194	49.822	32.2859	32.3927	29.1681	23.3878	25.2295	47.218	23.2897	32.8073	50.6275	23.3984
Ogfr	50.3029	54.4545	50.8611	58.3338	51.3804	40.2718	36.4649	42.1581	39.1188	36.335	76.5772	49.1885	56.6538	70.6683	61.8967	47.8199	44.7397	39.5908	42.8638	47.5813	50.6267	40.9186	41.592	49.364	56.3326	42.2093	48.4948	49.8932	44.4453
Pafah1b3	41.837	38.302	34.706	42.7748	48.5153	22.4623	33.4625	33.4142	21.8248	32.7531	53.9843	26.4363	30.6716	34.7135	27.9819	35.2601	36.1827	26.96	34.9578	42.2261	31.1288	37.5188	30.6365	36.5135	38.875	51.1039	36.6893	35.4727	39.9407
Parp12	32.9179	32.6505	29.5552	28.4182	26.3312	21.119	15.5056	21.0952	19.5419	20.6848	40.0327	31.4609	35.087	33.5386	37.6651	27.6664	28.0625	22.4064	28.1053	29.7119	28.2753	26.7499	28.5154	29.9804	34.4902	31.816	31.3915	33.3108	27.2221
Parp14	21.0345	26.0709	20.6372	22.415	18.7166	11.0078	8.65642	12.8553	11.2951	10.6291	29.2613	26.4663	27.8957	26.5974	30.7315	16.2894	17.7768	14.6154	22.9248	18.9922	15.5713	17.9829	18.5593	18.9125	20.1742	17.0325	19.6935	21.7862	16.8034
Parp3	5.94	6.94817	7.19253	8.2691	9.27656	4.29145	4.7242	5.15146	5.09687	5.2748	5.2457	6.8681	7.47059	4.52598	5.76644	5.01654	5.7529	3.73595	4.54648	7.12962	6.53989	5.35945	5.6615	5.21694	9.08306	6.55782	6.31433	4.74241	5.20889
Pcna	34.2706	31.9234	30.6368	40.9208	44.6987	30.8943	27.356	27.8579	23.3062	25.5055	49.9342	32.1598	35.7119	26.1449	26.9446	36.0492	27.9995	18.747	21.6664	31.4202	29.0347	30.3175	30.7005	26.9491	36.0071	37.7788	21.6725	30.9447	26.6345
Pdk4	5.92336	8.06251	9.1827	4.22495	6.80941	11.2705	8.53675	5.9828	11.849	10.855	5.0067	11.2415	7.05305	6.53772	5.99143	8.11429	3.71345	7.87702	7.574	4.90062	13.1821	10.8803	5.61607	5.74822	13.2097	12.0688	21.6797	29.1717	12.6538
Pglyrp1	120.454	127.139	121.423	147.517	190.236	84.8845	96.2661	129.226	106.472	99.5554	176.699	128.102	135.379	126.662	114.044	138.379	113.507	106.516	86.3868	157.237	122.461	125.228	148.872	148.932	133.94	124.939	133.228	108.592	94.7172
Pla2g16	90.6805	107.376	95.7499	76.2454	168.812	82.8671	79.9156	93.0575	59.6155	76.0517	114.512	80.2687	83.501	80.0719	106.706	82.4369	86.4953	74.7378	79.6369	103.04	79.0981	84.7238	114.433	117.752	84.0678	95.8627	107.393	108.31	104.687
Plac8	190.869	195.338	137.221	185.361	264.824	108.223	128.291	139.022	94.2897	102.806	188.128	130.76	146.6	123.447	111.946	108.23	137.848	116.726	141.515	204.763	156.582	178.918	187.329	170.009	194.58	178.817	194	136.873	114.096
Plac9a	30.8941	21.5854	28.9663	25.6112	42.8181	14.1075	13.5417	15.6549	12.2744	15.6867	39.2484	21.5106	20.3759	12.8403	8.50956	17.9865	18.1289	10.9595	9.60047	17.7255	16.4667	23.8795	29.5284	13.6621	30.0067	31.5139	17.4354	19.1372	24.2529
Plp2	56.5809	42.2083	41.6091	55.633	61.2261	40.4769	40.8575	40.4554	28.7385	33.995	51.7634	48.6293	45.6564	40.7829	44.6754	46.6703	42.8419	35.0865	44.243	54.0692	41.4146	37.6912	50.6491	37.2886	47.1359	62.4684	34.7808	33.7758	39.5911
Pmvk	17.5474	18.9477	14.3514	18.1986	27.3872	12.6668	15.9038	12.1929	9.9171	9.98336	24.5521	19.1663	19.2172	15.9228	16.2903	15.798	18.5502	14.0916	12.1338	14.8878	11.1527	18.4314	15.7549	14.779	13.8053	14.2179	13.2192	13.9366	14.0489
Pnlip	0	0	0	0	0	32.1435	0	0	0.220356	0	0	0	0	0	0	0.123126	0	0	0	0	0	0	0	0	0	0	0	0	0
Ppdpf	51.6684	63.197	58.2972	80.2454	109.987	55.9264	54.6261	59.8576	43.1351	52.1726	76.9834	39.5392	59.6956	44.9273	35.2732	48.9186	48.6156	48.2672	54.1439	76.419	45.2095	65.8751	58.0687	70.3693	84.1302	64.1273	57.8592	65.3288	70.8331
Ppfia3	12.7072	14.9767	18.007	15.1978	19.2424	9.44671	11.0758	16.751	9.17197	13.3753	25.5053	16.4105	13.9436	13.2309	15.4668	17.2622	14.746	12.7644	13.9918	14.5806	12.8888	14.7868	12.7852	11.2593	17.6973	10.8403	14.7703	15.2149	13.3924
Psma1	13.1316	13.0363	8.88604	14.839	25.1111	8.09592	8.48125	9.00312	9.04488	10.6754	18.9791	9.55025	14.3483	9.92518	8.32748	11.1297	9.62214	8.90659	14.2382	10.8031	8.05869	10.9631	15.2078	15.4681	9.52971	8.92874	12.9007	9.6817	12.8333
Psmb10	25.3566	25.3319	27.3759	35.3499	47.4521	18.1398	23.7725	31.1312	20.0306	16.6256	47.3849	33.7343	41.8171	29.6174	30.5112	34.1215	21.2758	18.9448	22.2057	27.494	22.9772	24.3599	33.5056	32.2864	33.4077	25.6757	34.1945	28.0781	22.6867
Psmb8	45.3257	39.2119	32.814	36.8856	52.167	11.5804	13.2742	30.5621	13.9666	12.3131	55.8341	28.0418	34.8115	28.5137	27.8566	24.1296	26.1704	15.9818	26.5992	20.2852	14.6177	24.7672	45.0144	31.0488	32.1158	22.2114	42.7536	38.8208	27.5457
Psmb9	27.6732	43.6651	29.7683	29.4664	30.2004	11.9981	9.48362	22.9389	13.0858	14.9017	46.0599	25.3467	32.975	28.8243	25.4173	19.6794	17.6342	12.8667	21.8454	23.1382	11.7259	18.1495	22.4216	18.9571	25.6717	20.8836	32.5909	36.3081	21.3201
Psme2b	136.232	149.051	122.719	167.042	225.65	100.13	91.5803	135.037	82.5688	95.8186	188.675	115.398	125.646	131.055	106.751	105.115	121.435	102.334	119.612	142.227	96.5408	132.313	150.816	153.457	148.582	123.441	156.123	146.6	108.698
Pycard	79.2057	76.3224	71.2919	63.8298	104.938	65.6673	56.3865	64.0867	61.0648	56.3299	77.5372	60.7511	71.8681	66.4326	66.7819	64.6662	61.109	66.2643	63.9781	81.7207	63.727	80.0746	93.026	84.5027	71.3361	72.5539	83.6307	85.0448	73.6288
Rab25	86.47	70.7401	72.9653	98.7746	137.895	61.7412	65.8501	89.0385	54.1202	59.1149	78.1017	85.2376	92.9913	67.4456	74.7103	84.2855	78.4982	53.9769	61.4459	107.696	75.7928	74.8872	115.45	72.0875	121.437	100.868	87.9851	94.7786	69.8771
Rac2	2.84774	3.67277	2.97968	4.37783	4.46611	1.80603	2.21412	2.5313	1.64274	1.30775	3.64549	1.96061	1.71883	2.57154	3.08973	2.76566	3.21117	3.23236	2.73272	3.08836	2.80893	2.58306	2.43977	2.6894	4.23594	3.73819	2.09282	4.90745	4.01666
Rasd2	7.21007	6.67924	8.26282	6.16745	6.96123	10.5445	7.34697	11.3886	11.1347	13.3019	12.146	9.56588	8.45882	7.40515	5.53522	13.4929	11.7842	10.3055	9.40172	10.5802	8.97941	9.55056	9.96763	3.24055	10.2722	6.54845	8.74415	5.10977	7.17062
Rbmxl1	7.82695	10.3935	9.18774	10.8448	13.2085	8.32512	5.37948	5.69153	5.80293	7.71294	7.1448	5.51171	7.71517	7.08119	7.63097	7.51608	10.698	6.90037	7.43699	9.76855	6.67537	7.74203	5.79904	5.0436	9.33239	4.86893	7.9606	10.4326	7.93076
Reg4	125.017	78.3552	81.5479	224.974	139.622	54.1715	112.646	101.238	54.8219	69.8686	140.489	39.3125	93.2075	119.798	154.212	74.5133	95.2697	97.5205	94.9782	107.011	54.0072	83.38	115.323	82.9906	77.3626	119.164	63.1435	30.1611	130.037
Retnlb	175.503	66.0514	61.2322	234.521	148.134	33.2909	145.593	171.076	54.2021	37.1715	312.417	20.0451	40.7591	227.09	463.398	69.5751	337.153	46.4592	91.8217	130.304	70.7293	28.0289	33.4609	15.4213	41.9693	250.634	46.9869	55.1312	84.2938
Rgs5	63.9935	54.6882	72.3026	49.9434	54.7255	83.8118	93.3925	58.8038	83.7629	80.5786	46.6847	81.0307	44.8534	61.0426	74.9076	48.4485	71.9051	83.1739	69.5823	57.4989	85.5068	56.0536	45.068	56.9316	59.6684	47.604	63.0848	64.3838	49.5337
Rheb	14.1502	20.3472	13.4396	11.962	22.102	12.3206	12.5884	10.6112	8.38296	13.4218	10.3908	12.7284	12.4323	12.3903	11.5059	11.5323	13.1234	12.1211	10.0082	18.7922	10.2264	13.775	15.86	11.8774	13.972	7.81888	15.943	12.9618	13.8704
Rnaset2b	49.3524	45.1845	37.2299	51.0915	70.6824	36.8777	34.7082	49.3979	27.8309	36.6358	48.529	38.979	41.7893	35.7663	39.3432	41.9176	37.9123	34.4557	39.0209	52.5681	25.4794	47.4222	56.1115	49.3118	49.8815	38.8973	41.988	45.5458	41.9639
Rnf186	110.377	132.709	118.119	125.535	151.731	95.5769	77.6883	95.3845	116.519	95.6516	125.397	119.097	120.594	101.32	102.706	81.6178	75.7435	90.0838	91.9379	87.9074	100.158	104.759	113.003	101.316	110.675	105.657	119.936	113.633	109.627
Rnf213	25.332	34.7307	31.3176	31.12	20.3648	15.0712	11.4301	15.1707	13.8345	13.9769	36.869	39.6885	39.6162	47.1988	53.4797	23.5009	25.3089	21.9141	31.6114	20.868	21.0398	20.878	18.1075	23.7221	28.2653	18.2937	21.0503	27.3448	20.1344
Rpl13-ps6	298.225	382.673	314.202	364.056	644.116	259.183	269.015	276.059	300.085	298.728	459.004	246.246	288.196	235.189	209.071	244.006	246.513	217.312	235.841	379.869	257.368	288.019	433.666	329.901	312.91	299.186	397.156	279.069	324.685
Rpl14	207.863	218.086	193.754	210.247	312.243	138.13	163.984	148.383	142.302	165.919	152.327	170.574	186.706	122.792	140.131	155.45	152.831	99.9503	127.77	222.73	173.235	221.896	224.841	172.074	168.724	142.617	227.484	136.452	155.052
Rpl18	102.703	118.366	117.834	127.564	219.671	102.647	107.266	111.142	84.979	96.3817	146.476	108.538	117.83	112.832	82.4993	105.632	81.4779	85.4263	91.389	163.665	89.0462	126.375	146.043	131.986	124.264	123.894	125.813	106.361	116.75
Rpl18a	165.307	258.484	249.951	224.984	501.54	151.573	161.01	177.03	181.447	237.372	216.661	155.972	158.562	143.087	128.1	145.398	157.458	136.074	157.411	275.945	137.178	184.982	248.606	203.823	181.869	167.976	273.554	167.837	175.725
Rpl23a	119.29	87.0851	112.367	142.296	209.013	83.9193	99.8399	129.591	84.202	100.174	101.377	129.505	142.213	131.732	104.375	139.078	131.067	105.463	109.423	168.596	110.862	144.176	171.57	117.971	136.582	150.578	130.474	99.9554	115.731
Rpl29	222.422	221.603	201.203	238.616	410.104	159.887	182.125	180.288	140.96	153.8	253.804	187.028	232.206	143.412	174.721	159.194	214.792	151.323	148.58	270.05	172.132	234.567	250.031	225.645	271.692	240.361	217.343	221.888	165.744
Rpl34-ps1	726.393	823.657	681.015	819.479	1409.67	591.258	515.824	520.777	559.277	703.725	730.623	433.072	547.972	442.094	399.833	403.038	592.331	520.239	516.866	894.416	503.053	670.595	934.014	782.172	704.754	587.571	762.102	508.415	621.52
Rpl36	304.403	322.077	315.731	401.35	595.344	206.296	244.78	256.282	301.885	290.431	358.154	220.012	263.747	218.223	200.862	213.761	212.519	203.928	170.011	436.654	258.379	274.873	358.11	311.034	357.456	271.18	427.182	247.41	292.822
Rpl41	1586.26	1380.15	1433.03	1826.74	2977.8	1296.6	1509.29	1538.81	1101.29	1291.76	1666.65	1526.9	1735.59	1665.12	1535.2	1534.14	1478.26	1331.94	1275.6	2120.93	1329.97	1818.84	2086.45	1710.34	1667.65	1775.95	1628.41	1464.72	1472.51
Rps15	430.821	441.702	468.044	583.171	793.717	272.222	440.631	508.771	333.673	474.656	434.32	446.694	571.077	443.96	396.232	552.922	419.428	385.779	377.536	560.694	404.704	530.144	520.248	448.827	519.137	523.787	494.351	389.716	484.961
Rps15a-ps5	163.717	224.988	207.777	208.271	459.795	138.614	142.259	168.303	146.099	217.251	151.979	176.1	136.76	117.989	151.133	129.838	154.827	148.769	197.298	242.883	148.648	199.05	257.904	243.163	140.822	177.732	221.111	166.211	215.004
Rps16	95.3227	88.4795	87.5463	137.645	200.269	75.0189	92.9604	104.362	66.4662	91.3624	115.12	106.471	112.59	97.0334	105.417	101.589	106.754	80.6879	99.0094	141.798	105.252	114.029	131.38	127.913	101.036	124.729	110.075	86.6141	88.4817
Rps18	215.858	241.601	200.15	218.843	407.443	153.406	196.79	224.885	168.679	195.663	245.744	211.471	230.394	176.815	175.32	176.812	172.871	167.867	174.078	284.148	165.712	245.651	363.652	275.47	244.502	247.739	250.89	217.865	223.486
Rps27	273.13	321.979	192.191	267.788	466.234	241.763	264.201	153.27	177.244	233.507	313.323	159.638	196.696	142.993	148.152	104.19	178.149	201.553	232.75	357.184	167.71	228.429	435.429	229.699	239.019	231.766	238.261	208.775	209.604
Rps27rt	1500.74	1688.99	971.108	1345.57	2552.2	1137.19	1540.72	1002.58	1091.48	1156.72	1636.52	1191.24	1080.4	973.821	1037.56	841.197	922.838	1202.77	1303.03	1755.14	1116.12	1186.43	2675.58	1280.39	1289.53	1372.11	1469.66	1271.1	1189.66
Rps5	478.33	458.293	403.741	540.414	788.184	390.685	419.029	386.682	301.537	433.573	462.458	349.905	361.78	310.281	318.006	318.097	390.108	292.831	368.575	528.078	369.087	467.677	660.574	426.209	505.106	400.274	462.675	405.449	448.758
Rps6	126.369	140.433	88.9006	121.519	206.291	95.2641	113.963	90.2321	81.6411	94.4434	158.444	90.5274	91.8209	69.7983	84.9271	70.1699	99.0538	98.874	108.816	156.417	92.8195	118.629	161.515	110.786	110.845	127.773	108.768	100.821	92.627
Rsad2	12.2167	14.4119	9.98524	15.2529	12.244	4.02795	3.82732	5.51255	3.83515	4.4126	18.6143	17.2375	13.9809	15.2781	11.9625	8.52402	10.1977	4.59139	12.65	13.4895	7.8704	8.67708	5.87992	9.73857	9.82755	7.31442	9.66717	12.3998	6.91377
Rtp4	19.2773	30.9129	17.3186	28.8791	38.4556	5.93484	3.16431	5.11323	3.72909	4.31039	34.7809	25.6371	23.1693	27.282	25.6995	15.5193	19.7319	7.12744	21.975	21.5641	18.5166	17.3062	12.6549	12.6534	23.0544	12.7541	20.537	25.3801	13.0282
S100a1	150.398	202.687	160.07	169.222	339.388	122.174	141.043	144.281	128.584	162.422	228.642	81.152	100.697	114.633	107.027	101.247	140.188	129.101	131.692	171.361	99.8547	148.238	180.957	122.509	146.681	150.714	154.675	126.636	142.696
S100a10	259.442	333.209	348.427	321.073	554.339	227.64	241.542	291.094	307.982	255.781	305.101	228.859	313.416	252.605	195.147	334.417	299.353	277.113	278.214	347.767	278.212	405.642	353.518	374.527	296.575	342.217	386.877	266.377	344.576
S100a14	74.7223	56.1036	50.8216	87.7302	93.0356	43.3291	49.2589	54.2841	28.81	38.4028	37.0094	38.8942	59.4987	43.5987	30.6119	61.8186	69.4166	51.4043	48.94	69.8631	38.5027	59.9989	76.2363	58.516	76.2142	54.6579	45.0869	29.9344	66.0425
S100a16	143.211	137.424	115.423	160.198	200.942	104.03	113.287	126.489	93.1928	107.293	128.832	100.638	120.397	103.66	100.765	124.895	121.054	94.521	99.2608	122.419	88.2927	121.598	157.167	108.142	177.215	105.994	122.289	97.7316	132.236
Samd9l	25.0611	22.4344	19.3985	21.488	21.946	17.1343	13.8583	13.6597	18.0229	15.9405	21.6977	23.4048	19.9804	23.7724	24.6071	19.3314	19.946	21.5232	28.0375	21.1109	21.4627	26.2125	20.5623	24.5405	18.187	17.2128	21.4929	23.4315	22.6539
Samhd1	16.6833	17.7496	20.2624	22.0036	21.3847	9.85661	8.8889	12.6227	8.98521	15.8249	21.493	15.8877	21.0598	15.585	17.4607	15.1679	16.557	14.5959	19.3678	22.1066	10.789	16.322	11.8044	14.6197	13.5528	12.2872	15.9595	12.4645	10.9495
Scarna13	311.557	263.679	240.404	239.454	516.277	209.126	206.358	248.766	235.831	238.909	268.013	230.249	224.825	236.03	160.607	191.001	232.725	214.968	242.219	335.564	177.791	287.089	361.764	219.657	226.332	351.131	256.535	182.577	242.462
Scd1	17.86	17.3351	19.813	17.9463	16.6863	18.0525	22.9508	21.3912	57.8295	13.3865	22.9462	16.2129	17.3041	14.8483	17.8316	18.9022	19.0739	15.9427	14.0468	13.9189	13.4013	16.6557	13.0873	16.0427	18.1624	26.9732	17.7252	36.0113	37.76
Scd2	169.493	143.522	160.466	156.415	109.446	109.624	113.282	128.292	113.741	90.5595	125.674	108.813	141.755	133.08	133.772	106.976	149.564	128.021	91.7629	79.0857	81.9676	92.3866	97.2583	79.5661	102.744	95.8704	73.8691	48.2636	105.569
Sectm1b	65.7479	45.4527	56.8623	50.5298	68.7554	30.5566	31.489	50.668	35.5315	60.1205	60.0463	56.6409	67.8641	43.7839	54.5158	38.3989	48.6062	40.5009	51.7244	78.6007	49.3399	51.1443	52.5822	47.954	62.4699	62.5887	56.5226	54.9573	34.366
Sertad1	34.5363	33.8834	32.3101	46.2986	54.6163	28.4952	29.6089	25.1103	21.7883	26.9286	47.6074	24.6895	27.0681	27.9126	22.2307	36.9141	36.2461	25.1798	23.3802	49.0848	22.454	32.6377	44.9452	46.8854	47.7192	26.1136	43.7562	32.2555	39.8076
Shank3	1.92569	2.15727	2.45802	2.3592	1.92852	3.55177	3.17158	3.37923	3.50304	3.00908	3.76781	2.45595	2.70209	2.86047	3.16042	3.05954	3.36288	2.73547	1.9535	1.11838	2.49262	1.62979	2.38666	2.4343	2.66553	2.22931	2.00143	2.23705	2.82906
Shfm1	99.6568	156.998	98.5479	118.049	250.676	109.058	93.6298	81.7259	106.416	110.767	119.366	77.4598	90.5766	71.8514	69.185	81.9471	122.41	100.33	114.287	150.563	83.9306	116.481	140.215	145.599	99.0911	79.3095	137.637	113.086	114.322
Slc25a46	9.29926	7.85796	8.43689	8.73682	7.9908	11.1476	12.3831	10.8464	16.0253	10.6199	7.48242	10.0235	10.8598	11.1319	10.3708	10.429	9.34158	11.7587	11.8196	9.33188	13.3069	10.3714	9.10222	11.2268	9.08904	11.1258	9.96837	10.6911	12.4229
Slfn4	46.2454	51.9303	38.9704	65.1362	56.1871	19.6192	13.7658	12.8662	20.0436	15.2291	73.7812	50.9824	46.1849	79.3451	88.4272	42.5705	41.0906	26.8778	56.8937	36.2544	31.2092	34.285	34.6264	35.2676	42.8373	23.2738	27.2528	45.4343	29.3337
Smim11	29.9103	48.7079	58.0025	53.7487	97.9187	34.2239	40.3221	37.5898	42.4956	37.771	61.3471	42.4669	35.3482	32.2754	33.7514	32.6186	50.6658	37.8654	44.555	60.4195	30.8379	45.9991	42.5175	52.0749	38.7616	45.5081	52.0396	42.5316	44.5813
Snora74a	2089.71	1319.11	999.657	1227.63	2522.05	1084.82	850.68	1117.79	1499.73	852.4	2249.12	1690.09	1367.74	2045.19	1139.08	1024.72	798.74	1732.67	1248.8	1428.01	975.411	990.958	4056.37	2733.27	1361.3	1447.84	1883.63	1412.71	1109.31
Snord17	700.63	497.294	316.751	502.309	2528.25	474.548	381.958	371.29	605.06	273.899	3881.49	481.114	363.258	666.122	513.232	433.887	236.4	405.415	326.957	554.199	328.915	405.731	3010.76	1658.21	394.008	837.784	449.351	329.016	399.453
Snx3	46.3295	44.8061	46.4342	54.6879	66.8479	33.2079	36.6781	48.4774	33.3435	46.1457	40.9206	43.8514	41.9138	39.7587	54.4682	48.2186	49.3246	40.3686	41.4152	46.9435	41.858	44.753	44.3607	38.3637	56.3836	44.9625	41.2361	47.3129	38.2271
Socs1	6.59804	8.88803	10.808	16.0447	10.3919	2.0903	9.49203	10.0481	4.40161	4.64649	20.9961	6.37743	15.867	11.3049	10.7482	6.04508	12.4894	4.99174	6.3008	9.18664	9.1119	8.48819	6.10724	9.57985	12.0771	9.9843	11.4466	9.46909	8.98911
Sp100	4.59745	3.76511	4.59303	3.8695	4.37836	1.6817	1.27031	2.59671	2.77328	2.60151	2.98871	4.01954	7.16784	4.75436	5.6956	3.91561	3.91441	4.27879	5.23742	3.98882	3.55301	4.18505	4.34936	3.37397	4.75137	6.14647	3.83865	4.70121	4.04367
Spats2l	17.3778	20.1289	17.1796	18.047	23.3638	9.8486	10.8998	15.6404	8.95758	8.98489	21.8732	20.7933	17.4927	18.645	22.0352	14.5093	15.1701	7.04969	18.8573	21.1259	14.9561	15.1049	16.0764	15.0211	24.484	19.3712	20.6629	20.0966	15.0259
Spink1	77.9267	54.4808	56.1821	76.0036	181.136	28.4868	51.6759	58.4782	46.7891	86.7936	10.8351	32.2149	61.9356	21.127	25.3894	62.6034	36.1103	59.4289	66.8958	130.301	30.2535	89.6975	95.1829	75.1765	80.3045	83.8018	76.9674	50.2308	106.167
Spink4	582.862	393.179	347.002	714.895	602.86	418.926	528.502	465.552	355.134	246.725	1209.54	335.808	371.661	364.764	814.405	349.31	538.84	258.219	296.094	710.79	358.906	350.175	503.399	678.616	300.486	494.64	317.497	464.451	303.173
Sptssb	31.2824	42.6529	31.4824	18.7178	24.6022	59.3372	38.17	27.9316	47.3176	31.4932	26.3462	49.4955	37.1727	41.2152	46.4205	32.2432	27.5489	44.1469	39.3096	38.5889	45.3747	50.3469	24.9677	46.0588	30.3316	32.4644	40.9009	65.5219	29.3082
Stat1	13.2231	16.3899	15.5545	14.3895	12.3068	6.46285	5.7813	8.287	7.86959	6.78279	17.3397	17.0544	18.5449	15.21	16.7297	11.743	10.6422	9.60557	10.8464	10.1253	11.4839	9.90329	9.98246	9.94137	12.2808	9.34509	13.599	14.6932	9.7112
Stat2	12.6862	15.9845	12.9869	16.2363	13.5818	6.70293	6.30839	8.02732	6.25808	7.69008	18.0795	15.466	19.7005	21.3475	22.1582	12.4014	12.8784	8.673	12.8347	11.3023	10.0751	9.54346	10.9251	12.2256	13.8832	9.96123	13.4292	15.1313	11.6885
Sval1	75.929	39.3604	44.3575	53.2101	102.491	32.5462	31.1214	44.296	50.1065	47.507	25.4741	40.0871	51.3258	37.4246	30.4536	81.4184	40.8833	44.0433	52.6448	107.269	34.9373	66.0028	74.0541	61.0009	46.9834	39.6792	44.8841	21.4142	69.2654
Sycn	897.937	675.336	598.622	1004.78	1640.86	627.933	798.138	927.279	544.85	714.507	674.676	657.936	802.533	446.993	463.389	705.646	508.03	358.161	603.195	668.447	399.509	733.334	1356.45	569.451	987.076	894.109	844.211	437.382	973.915
Tap1	17.5519	22.9119	23.4314	25.6219	18.1091	5.23039	5.53516	9.17894	5.92528	6.06567	21.579	19.3388	29.4302	19.04	18.4116	14.5609	16.0629	9.0707	12.6857	13.0331	11.622	9.48735	12.0694	12.9339	14.3838	13.484	18.6136	17.7032	10.4691
Tap2	19.323	19.114	19.8112	17.0025	11.122	11.1392	9.79475	17.3283	12.0157	10.2824	24.7166	15.6885	26.7015	21.8561	22.8271	18.2258	14.4444	10.2606	14.7279	13.8284	17.1241	17.3595	15.1333	16.5628	19.4587	15.2293	24.1712	18.7462	15.8827
Tcf19	5.47905	5.09797	5.21421	6.43217	7.2157	3.36645	2.81576	3.67728	3.41956	3.21835	4.09265	3.83021	5.76365	4.23309	4.03945	3.37424	5.39063	4.22866	5.98529	3.20281	5.21923	3.12132	4.46909	3.17424	4.43545	5.62913	2.43509	4.43359	2.62815
Tma7	41.2458	54.4697	42.024	42.1377	101.632	34.2728	29.8559	33.7965	39.1989	54.278	16.803	22.9849	32.6133	34.603	22.3243	22.9157	40.8832	29.1315	37.1885	52.1664	31.8148	40.1963	43.5923	34.4573	33.309	18.2237	55.7638	30.8313	45.4538
Tmem14c	50.2385	79.27	63.6526	63.5801	106.439	55.3551	47.2631	49.2944	47.7637	56.3487	48.6504	52.5008	54.4991	45.5065	50.624	51.8737	51.5403	41.4804	34.8713	67.2522	45.9893	46.8847	67.1339	49.5005	61.1331	59.0735	67.5707	68.3137	51.9707
Tmsb10	237.593	223.49	202.982	252.163	336.256	242.087	221.525	193.749	147.717	147.88	382.815	222.044	218.366	216.599	232.373	235.122	228.147	169.673	140.921	261.95	229.246	237.211	196.785	277.435	240.545	293.799	191.065	239.518	157.279
Tmsb4x	835.509	1255.6	934.136	962.904	1981.07	873.519	830.378	709.163	1078.49	852.111	1090.84	707.982	617.739	633.48	596.035	573.401	908.848	841.723	853.618	1233.83	959.969	1115.81	951.957	1061.54	758.772	705.544	1335.08	954.893	868.261
Tnfsf10	5.71157	10.5026	5.97543	6.05843	3.51667	4.03711	2.98141	4.35255	3.59197	2.75531	5.491	7.69618	8.77898	6.11826	7.54177	4.00282	4.49147	3.95593	5.83205	4.89514	4.72415	4.03583	4.55942	4.68774	4.10167	4.68473	6.5397	6.15425	4.8418
Trafd1	27.366	32.9991	28.4437	26.8104	22.5017	16.5724	17.577	19.2656	18.3276	15.8259	29.3909	33.0045	31.3586	36.9081	34.2376	25.4112	20.5719	17.9533	24.2328	21.4613	20.8442	20.8093	21.6135	24.0625	23.7115	23.9282	25.088	27.9163	18.6039
Trf	13.9061	10.1208	9.09099	16.7641	15.3688	6.14394	10.1581	8.29755	11.931	7.5676	13.0787	13.5076	13.0874	6.88801	9.7505	16.7186	7.4954	8.28261	10.3216	14.3983	6.83533	12.7164	13.8603	11.0464	17.0222	10.2497	11.2675	11.6691	19.3503
Trim12a	12.9696	12.6165	8.36196	11.9238	15.5724	7.22267	8.45742	9.405	8.35874	7.20526	10.3669	14.5134	22.0396	14.9138	15.3948	9.93902	9.70784	10.0745	12.7492	16.862	11.6884	9.80748	14.7884	21.191	12.1871	16.1925	13.1194	14.3579	9.45608
Trim30a	7.13157	9.46906	5.47354	8.95776	10.1308	3.15255	2.18061	3.29033	3.52223	1.67583	9.35368	8.78723	7.85688	11.5846	12.4854	4.92241	5.72074	4.06222	8.97758	5.51686	5.77814	5.43233	4.3375	4.29189	7.01659	3.9007	5.62317	8.37669	4.33774
Trim30d	12.7631	15.7233	10.2822	11.543	10.145	5.00431	4.11924	4.1914	6.00476	6.59264	10.8822	13.8487	14.2884	14.7382	14.7542	6.4736	11.8599	7.95049	13.7647	8.96572	11.6501	8.62094	9.67637	6.27176	8.88033	7.47725	11.681	11.5212	7.63648
Trim34a	6.79884	6.43583	6.06738	6.71138	8.43735	4.15298	2.86513	5.66898	4.39418	3.73895	6.68787	9.83211	9.1966	9.70518	7.70832	5.83734	5.77441	5.98242	8.85557	8.14353	6.2269	6.88634	7.35084	7.69306	5.88869	7.01868	7.10442	9.5919	7.22161
Try4	0	0	0	0	0	52.1455	0	0	0.448887	0	1.14973	0	0	0	0	0	0	0	0	0	0	0	0	0	0	0	0	0	0
Try5	0	0	0	0	0	31.726	0	0	0	0	0	0	0	0	0	0	0	0	0	0	0	0	0	0	0	0	0	0	0
Tsku	11.8604	15.9204	14.3117	12.2271	9.13913	18.4154	15.9961	17.3002	15.6872	21.2456	12.4162	23.0061	16.5947	17.7541	20.8348	11.1756	11.4366	19.2809	12.8825	17.5905	19.874	19.5119	11.0324	11.8982	17.1663	16.8562	15.4448	24.9494	13.7046
Tuba1b	123.203	146.22	140.801	150.789	229.729	109.447	90.2092	114.536	86.1196	119.492	142.686	97.9134	113.635	90.1571	84.1154	102.207	136.137	101.426	108.033	124.92	102.191	107.145	114.793	98.8367	133.117	110.905	127.647	121.918	106.794
Tuba1c	57.8798	68.9757	61.8998	69.9661	96.192	61.9751	50.3566	59.9905	42.3702	59.6528	60.8033	42.4752	47.6428	45.5792	53.4724	56.0549	70.274	43.2409	51.6299	57.2153	51.7289	58.8316	63.4623	43.7555	63.334	49.7978	61.4923	58.3216	57.7976
Tubb5	103.312	115.343	123.918	136.945	134.924	75.9116	89.4645	116.506	66.9292	94.5446	92.7393	108.47	103.278	88.549	90.9588	96.6398	114.93	69.4174	85.235	95.7759	86.4773	95.5469	88.6601	83.2284	117.48	99.6943	113.999	95.3087	78.1735
Uba7	10.3942	8.84407	9.35752	10.3303	9.41357	6.83932	4.36809	7.81648	7.97012	4.8555	12.7256	11.6929	11.405	11.8625	14.8067	10.6037	7.23958	6.5706	9.35207	9.18947	9.06729	8.55156	10.8329	11.4556	10.4258	6.33859	9.95321	11.381	8.82089
Ube2l6	12.5184	14.8912	13.7398	15.5424	12.349	4.21779	4.85103	7.83351	5.71115	8.01019	19.9928	14.3335	9.1721	12.5925	14.5956	9.03581	10.5785	7.50838	9.81597	12.1145	8.92221	6.80902	8.87655	7.61153	12.1921	7.32303	11.1722	11.8474	9.13974
Unc93b1	35.1876	25.5248	23.449	31.4434	26.2868	15.9792	18.6465	22.4757	19.0105	18.4155	28.3907	29.923	29.8856	27.6497	26.402	26.1845	21.1384	18.9544	23.4349	29.5904	24.3739	26.0257	24.3308	28.6808	32.3687	20.3836	27.4249	28.3897	24.6256
Upp1	24.1391	15.6497	16.4851	21.7388	24.3949	6.74636	14.5254	25.7807	11.6679	11.4307	23.2158	13.2154	22.2891	14.1457	14.472	17.928	11.0955	11.1715	18.505	9.98244	9.97748	16.9423	34.5842	20.6814	37.798	19.3301	26.7469	16.6307	20.1167
Uqcrfs1	125.758	134.204	104.588	108.097	174.242	76.2733	97.6876	92.7551	89.7869	92.0972	127.55	93.2367	104.608	79.0726	91.7313	90.6206	102.673	95.787	84.8579	128.627	86.0905	114.065	141.347	105.894	122.251	108.245	101.158	112.62	93.6555
Usp18	3.14177	5.13915	4.13125	4.76836	5.64758	0.919231	0.23158	2.1633	1.82089	1.4553	4.16566	3.46916	3.98092	4.54525	6.18496	3.56607	4.54051	1.2176	5.13697	4.04743	2.88666	3.33337	1.15519	2.64841	3.84179	1.01929	3.99368	4.52988	2.52686
Vps29	26.9511	29.8328	28.5162	26.7881	42.9329	20.2852	15.9136	18.2506	26.3347	26.3479	29.0706	15.7227	15.5679	15.9909	13.9363	20.3833	26.4895	19.7721	25.6188	27.25	14.8823	28.9124	26.8692	31.0069	22.3443	21.8633	28.5732	20.7876	25.1016
Wfdc2	53.5579	60.9503	54.7108	68.1381	119.881	40.1432	46.8056	46.2667	24.4434	53.2691	37.3585	45.2373	80.4551	42.3953	42.5121	56.6069	56.6712	41.9653	57.3504	46.8153	45.8982	62.0291	71.2486	48.3171	62.0269	75.5082	46.7609	30.4822	65.3926
Wnk2	1.9332	2.49056	3.03801	2.44133	1.94819	2.90071	4.72525	4.17817	2.57923	2.29013	3.74381	4.27958	3.21587	3.53718	4.68165	2.99674	3.46312	4.24261	2.4516	1.53373	3.62175	2.9932	2.22642	4.01549	2.6722	1.67963	2.21077	3.28828	2.13485
Xaf1	4.51305	7.63191	4.61499	7.21495	8.30489	1.98042	2.35803	1.31986	1.93614	3.03599	9.09344	9.0855	7.20518	9.17017	9.75813	4.50299	4.28373	4.05997	7.12661	4.46291	6.81872	7.71397	4.41537	3.99088	5.37819	2.60228	5.23196	5.79457	4.42594
Zbp1	21.9276	22.4795	15.3112	29.0814	28.643	5.72164	7.06783	14.0259	6.91951	4.49963	33.9996	21.4302	25.7827	27.3567	38.4394	10.8341	15.8511	15.2106	20.9864	14.6739	12.3705	11.3799	17.6071	22.8717	16.2618	26.4537	17.8138	25.1248	13.3515
Zbtb16	5.45085	6.0512	4.62111	6.13792	4.72279	10.1543	11.6768	9.50531	11.7192	6.18022	8.94599	6.80576	5.16883	8.97908	7.13633	11.2269	10.4751	7.88435	11.2736	9.30934	7.44847	9.86836	13.0019	8.36061	11.2063	8.60678	9.09307	11.2043	10.7623
Znfx1	13.5989	16.3161	14.8754	15.4246	12.5873	9.49913	8.74392	9.56847	10.8324	9.32303	19.0075	18.1193	19.5958	19.0859	20.1034	15.2927	14.8598	12.3143	12.5277	13.3773	13.1421	11.6463	11.4554	13.1736	16.1908	12.4766	13.324	14.254	10.5142
44444	40.6951	44.6351	47.113	42.7239	32.1509	30.1556	48.8021	46.478	34.1982	37.1724	58.3964	56.1557	47.6452	52.6237	56.2759	51.7436	42.4999	40.8096	37.3709	51.2559	52.4349	47.0865	40.6909	38.2465	51.6944	48.0672	50.2135	61.0954	36.3365
44446	23.8515	21.3925	18.2641	21.8472	28.4853	20.3576	20.518	19.0423	25.54	19.1838	16.5253	17.9804	15.8522	20.6129	14.7613	18.5272	19.7422	18.451	18.3481	22.9385	19.2832	23.088	22.4218	25.0178	15.7094	16.7729	22.3979	17.0758	20.9056
1810065E05Rik	298.734	342.975	207.104	237.51	245.744	413.976	368.868	179.288	284.436	224.69	464.761	439.917	297.365	349.33	468.396	204.547	199.837	394.413	317.297	368.242	376.484	327.995	309.006	353.976	242.767	217.155	243.859	493.789	192.579
2310079G19Rik	8.08347	1.98542	3.95077	8.01105	7.7638	1.02366	5.64385	6.97136	2.0029	3.88414	0	0.842643	3.07941	1.54796	0	3.33533	3.74038	3.4563	5.53785	7.05153	3.47222	5.04844	11.1537	2.32706	19.3438	2.23833	2.13113	0.384237	10.5086
5330417C22Rik	34.103	50.3421	53.7362	42.8874	36.9761	49.4447	47.8321	51.3461	45.0735	54.232	55.3198	63.9325	50.5463	59.4522	58.0918	59.9304	60.1829	47.8489	51.7642	52.1169	52.0975	42.5548	47.1129	37.8007	37.8633	47.6257	52.3463	66.725	40.527
A4gnt	6.72067	14.9512	10.8507	7.27658	6.38388	12.7392	12.9029	10.6596	11.4207	8.80385	10.9515	20.6131	13.7348	14.3085	16.749	10.3461	12.0489	13.0641	11.8665	8.54623	13.0913	9.61393	8.35458	15.3411	10.5721	9.4924	9.86602	17.2899	4.90818
Aadac	11.3114	9.06329	11.0937	11.5328	21.7843	13.684	7.53786	7.52363	10.2828	14.0235	8.51287	8.6881	8.91471	8.39534	7.04244	12.6233	11.9154	7.86786	13.5582	14.3239	10.0113	10.5934	16.1225	8.22154	12.3439	23.7291	13.8271	14.0322	11.3483
Abat	55.0183	62.592	55.1335	65.4157	59.6135	49.8111	53.0423	63.1763	59.9883	74.2464	37.7198	41.3974	59.9541	41.3893	35.5227	52.9833	51.3311	53.1637	50.3994	52.7903	47.0487	52.957	54.8887	41.0305	75.4804	60.6304	59.6907	46.9788	64.1392
Abca12	1.96164	3.56717	2.65688	2.10007	1.05947	3.2782	2.71636	1.06204	3.1643	2.1356	3.22249	4.79389	3.75134	4.39651	4.47906	2.08705	2.1009	3.60479	3.09105	1.69462	3.19235	4.07445	2.3889	3.07126	1.96628	1.32498	2.68696	4.65559	1.24343
Abca7	9.97418	9.00582	9.75646	8.14596	6.40608	11.6911	9.26108	11.1146	10.2657	9.55233	12.5579	11.2659	10.7191	11.3934	11.0313	9.19316	8.91214	7.99486	8.77074	8.00964	10.8122	9.923	7.66664	8.32511	9.12317	10.256	8.4783	8.74653	8.03611
Acsf2	19.0281	32.7571	31.1691	24.4842	15.2536	31.106	31.8067	29.1933	31.673	20.8208	45.8269	37.5876	33.2243	39.3535	43.0362	26.6627	23.5121	31.2662	20.039	15.8761	31.4137	28.9032	18.5746	31.3191	24.1351	21.6084	22.6848	31.9273	20.4361
Acsm3	32.1221	32.0489	34.0227	37.5176	46.2469	24.3486	31.1313	30.5262	26.2767	40.8708	24.5338	23.7949	28.2563	26.2801	27.5661	27.0959	24.8329	28.8278	36.3532	29.5716	29.7996	33.6243	38.5057	28.2322	24.5327	26.4661	30.2617	19.3372	37.9733
Adh1	233.463	236.371	211.921	301.192	394.685	184.882	236.896	291.102	205.5	306.061	134.792	155.929	261.425	150.571	122.877	199.038	134.238	217.907	207.352	287.706	174.173	249.441	342.024	223.977	322.457	271.094	283.07	133.959	308.922
Adra2a	8.51953	19.2098	17.5283	10.1241	9.49555	16.9927	14.0064	14.9079	20.5544	12.1461	26.3579	25.7867	15.0712	16.0391	19.8861	18.9359	12.9899	14.7987	13.5825	15.2298	30.6423	19.6007	13.9601	15.1353	19.2407	15.7029	22.4377	27.0983	14.6937
Agpat9	3.22932	4.71143	4.0689	4.05225	3.33103	6.20843	4.34986	3.73642	6.08961	5.46004	10.1508	5.49201	4.74097	6.20519	5.2821	5.39625	5.79738	4.3534	4.54244	3.44019	5.31851	6.21133	7.07017	4.45306	4.77972	5.47591	5.34583	6.93478	3.79085
Agrn	11.6746	11.9035	10.685	11.4693	8.02803	11.5018	8.35151	10.3844	11.1214	9.10253	16.3139	16.2567	14.0764	18.701	18.2028	12.4966	11.5319	10.2574	11.4598	10.8546	10.7205	10.3333	9.89976	8.83701	11.8221	8.60544	9.00358	12.2407	11.7351
AI854703	11.2023	8.95007	7.81385	12.7265	13.3458	8.26514	10.3248	11.943	12.1284	14.7468	3.07458	4.96526	13.168	10.9922	5.89601	10.6047	6.92763	10.5762	11.7205	9.8007	7.48322	12.9768	14.2698	9.07801	20.5913	13.8318	10.7876	5.96166	18.564
Aldh1a1	14.4624	20.588	14.9898	14.1255	16.0814	24.1439	16.5623	11.1905	22.7691	22.0606	17.55	27.2775	17.1725	26.3635	26.4762	14.687	11.8769	23.3908	17.5855	14.0735	23.0768	21.1968	14.9376	15.5332	15.9125	13.1878	19.5844	38.0018	14.6056
Ano7	5.67697	5.96883	8.73323	6.18194	4.88445	7.91214	8.10317	6.56058	6.22124	7.10499	9.19905	8.91419	7.72923	6.74465	10.1588	9.05707	10.1016	7.40343	8.71447	6.96081	5.85033	6.99756	7.25308	7.30534	7.01005	7.58543	4.57713	9.76129	6.54246
Anxa1	10.8634	14.3324	10.5749	15.594	18.8758	9.37906	9.03746	11.6754	11.1133	9.85364	6.62164	7.99611	8.20266	6.99274	6.48022	10.2993	11.8244	10.8516	9.75313	11.6607	6.81953	11.0958	13.3238	9.62596	10.9602	9.26113	12.5333	7.01786	9.08141
Aplp1	5.84986	7.29059	6.18236	5.29717	5.43766	5.42393	6.70291	8.55877	7.12661	5.68159	9.04468	8.81313	10.1921	8.04705	9.49186	10.9474	7.29476	7.93438	8.73996	7.63424	9.12451	9.96127	7.26231	8.06468	7.26817	5.54302	8.47304	11.1059	7.64138
Apobec1	13.3417	9.95186	13.4999	12.8011	16.9517	8.37303	9.69933	7.75799	13.7446	10.8906	7.82318	7.13308	10.6017	7.12488	8.99518	14.4999	12.9076	10.384	15.4266	13.7435	10.9865	13.9606	14.6346	9.37054	19.504	11.739	14.049	11.3402	14.7149
Aqp8	347.78	360.985	392.841	426.1	619.896	387.128	408.688	443.596	424.686	591.629	348.375	341.131	359.644	235.163	244.694	386.388	385.656	275.172	370.882	377.394	310.844	412.77	547.875	331.554	619.011	460.91	518.374	426.626	692.651
Arhgap20	4.43707	5.3838	6.29887	3.12624	2.93829	6.06878	7.08355	3.88332	4.58385	7.21201	5.81133	8.43334	5.79306	6.22285	7.32687	4.62431	4.36339	5.87877	7.2145	5.36361	6.53624	6.23086	5.21468	5.98582	5.13315	5.09072	6.20076	9.4551	4.58223
Atn1	18.8413	14.7593	18.0495	16.4786	11.362	15.6038	18.9546	22.969	15.4471	18.3324	26.3887	17.8135	19.7236	22.407	22.8778	17.6727	20.8625	18.9944	16.7784	13.9264	19.1157	14.8642	10.957	16.8886	17.1674	18.9939	11.8115	15.0952	11.4433
Atp11a	10.7496	12.0767	13.5163	10.4017	8.97865	14.2659	15.0065	12.0481	15.0583	11.9214	15.4867	14.3381	12.5359	13.913	16.8818	13.9725	13.5285	12.1045	12.2399	12.7576	15.2072	12.5081	11.1374	11.3931	12.2303	10.9191	10.7267	15.5104	11.1425
Atp12a	57.281	54.1443	34.6138	43.7608	52.1948	25.7231	29.0852	66.619	57.678	72.1101	11.0772	22.3723	50.8794	18.3459	15.5296	29.3289	19.1461	39.8945	43.352	26.1724	17.3024	55.4184	62.2327	37.4875	93.2298	81.7703	74.1434	33.0435	79.1594
Auts2	4.79861	5.71056	6.78582	4.5324	3.05049	6.08823	8.02187	6.74446	5.98248	6.2271	9.4211	6.35642	5.6375	7.29585	7.76962	6.02094	6.54979	8.29022	4.69426	3.1379	7.8135	5.17247	3.38221	6.29393	4.87036	6.33876	3.6772	3.93847	4.37976
B4galnt1	20.098	30.7815	33.9183	19.0086	16.9781	35.7063	30.9941	33.0681	23.4034	19.6798	61.1063	39.6717	27.3302	36.5194	39.4175	29.2871	28.9238	30.0718	17.5835	16.4062	27.2936	27.0645	28.2446	41.6255	25.3067	31.039	27.567	43.8753	26.0917
Bag6	19.5692	18.9756	19.7265	19.1402	13.3064	15.5617	21.8801	20.2702	19.1058	14.7354	26.2846	23.0302	22.4384	26.2353	20.9046	24.8564	20.7529	17.6117	18.692	17.203	18.323	19.701	20.1399	17.7503	18.2652	19.8081	15.7892	16.9528	15.8325
Bahcc1	2.59066	2.31721	2.89367	2.93775	1.79161	2.73276	3.02011	3.165	2.97384	3.24255	4.25119	3.13205	2.81462	3.80644	3.60954	3.40553	3.05937	3.91673	2.45163	2.30192	3.3273	2.70063	3.1149	2.70167	2.62207	2.97308	2.43937	2.55605	2.24963
BC030870	62.7238	60.0806	48.3673	64.1553	78.5452	66.2571	54.9616	56.863	52.0145	58.1368	35.4845	40.0154	42.384	47.401	43.63	47.1186	64.1078	49.931	56.7784	66.8641	49.7838	63.073	73.0599	56.6441	54.146	59.4529	57.3003	44.9176	72.146
Birc5	18.6272	23.5558	15.7405	20.6563	25.2097	15.4058	13.2558	15.9445	11.7317	11.4047	17.2953	10.8537	13.7216	14.3718	11.5764	13.8489	22.8748	14.3063	13.6485	10.5201	16.4218	19.1447	16.1211	17.5819	17.1514	26.8725	16.7464	17.0755	15.7298
C1d	19.5047	29.597	23.3828	20.3501	40.2952	17.879	18.9838	15.6756	28.2324	21.4261	19.9115	22.3501	14.5654	16.8862	18.101	17.165	18.9386	15.9276	21.7658	20.0505	18.889	24.534	29.4219	25.6461	17.0405	20.4477	26.169	20.2543	21.8572
Camsap3	13.4888	14.7806	16.463	13.6095	9.89129	15.9309	18.1092	15.5559	15.9937	12.062	25.5907	15.9711	13.1041	19.1918	16.1729	22.6558	16.5775	18.233	14.368	9.95758	12.9019	9.25299	15.5377	17.5143	11.1806	16.2525	11.6711	12.5935	13.239
Car1	744.507	1037.43	873.671	809.072	886.815	1192.43	1084.41	377.31	1242.11	810.471	1183.18	1452.92	1144.63	1321.89	1251.78	814.348	635.968	1542.94	1175.85	868.834	1741.31	1630.51	957.603	1606.78	914.322	712.518	1377.99	2268.43	799.665
Car12	9.40544	15.4644	14.1825	10.2935	8.67874	18.1778	16.3755	12.6348	13.5875	13.3415	13.8193	21.9903	17.3955	17.6735	22.3954	13.9898	16.7272	15.5992	14.5335	10.948	20.044	16.7841	11.756	12.9399	14.6452	8.92814	16.3301	22.8465	11.5484
Car4	298.762	258.756	268.808	349.805	481.337	219.722	296.233	419.886	216.612	396.566	252.653	263.93	339.478	193.847	207.527	296.614	234.006	253.235	302.032	396.525	219.43	345.4	375.44	292.768	503.14	467.084	356.263	283.87	400.635
Car8	3.05342	5.44064	3.81247	3.11405	3.31922	4.89811	5.46854	3.55145	4.63759	3.04788	7.42521	5.94642	3.36651	6.3134	6.42272	2.90701	3.13057	5.69113	4.16852	3.2012	5.13985	4.38768	3.0379	6.67347	3.05582	4.18194	4.74347	7.23196	2.38723
Cbs	12.2117	19.0064	19.4933	15.8492	14.5265	17.316	20.185	17.9177	15.2576	13.0813	20.1759	25.1461	18.8149	21.0518	23.651	19.1936	19.0134	13.2159	15.6137	17.6761	16.4358	16.2785	13.7154	19.7748	15.0546	11.8473	17.6272	19.249	14.6716
Ccl28	41.2619	41.3473	28.3741	45.2438	40.8266	33.4692	43.6141	35.1972	44.2147	42.376	25.1937	23.852	30.9833	34.0695	30.4979	29.2679	39.7547	36.4896	40.4312	33.3845	28.25	35.335	41.8636	26.0621	33.8904	41.409	31.9472	26.3595	41.0961
Cd79a	4.66381	0.978554	3.6616	4.80415	6.7905	1.26663	0.318582	2.74301	3.74923	2.40532	1.90971	1.84826	1.28427	1.55529	1.95666	4.32481	4.16924	3.34645	2.29209	4.37598	1.80246	3.71929	3.57136	6.54071	3.25387	2.09756	2.27188	5.02615	3.88177
Cdca3	12.1586	17.842	12.8769	14.5134	28.2632	14.4806	9.25271	14.2935	10.5698	14.8051	9.5202	8.61377	11.0348	9.08801	6.03482	15.2537	18.5451	9.47237	12.2704	8.75284	9.84161	12.3454	15.7268	14.731	14.6739	11.7059	12.9997	12.22	13.8449
Cdhr5	109.202	103.924	96.7593	109.073	84.9365	106.866	126.046	133.818	106.253	117.733	143.429	140.235	142.912	132.534	131.562	148.706	114.017	127.276	106.271	109.705	133.972	135.037	99.2162	124.316	140.884	134.913	98.9401	117.885	94.7714
Cdx2	60.2591	90.3201	81.7176	71.5433	55.8501	77.7831	86.9809	71.349	68.1708	63.3786	114.784	95.778	73.7997	90.2997	106.553	87.9259	107.122	88.8549	62.7551	55.3437	77.2868	80.5234	53.3289	79.7706	61.7313	71.3635	76.0454	89.7236	72.7778
Cela1	90.9124	63.0749	61.917	98.9546	120.139	144.569	67.7917	68.2366	48.7928	70.0901	50.0999	46.9274	80.7301	50.2415	37.5945	71.4468	50.7637	56.9865	65.552	87.3621	44.287	75.8984	90.9364	92.759	93.0896	78.08	60.0463	47.9284	82.3648
Celsr1	11.5877	13.5466	13.6345	11.3626	7.346	14.0761	13.3421	14.101	13.8312	10.2414	16.4655	13.5812	13.4393	17.2152	13.9469	15.7431	12.3119	14.7051	11.8123	11.1293	13.4071	10.075	11.2309	15.7739	10.4526	9.74826	9.19831	9.47609	10.5359
Cenpf	5.92537	6.32837	4.97682	4.02915	4.9002	5.8098	4.38282	4.78339	4.84148	5.06079	4.12512	3.86412	3.60755	4.17707	3.67334	4.19688	5.98271	5.1219	5.55422	3.72774	5.53068	3.89406	4.68003	4.66128	3.2539	4.24117	4.299	4.59437	5.02729
Ces1d	11.3227	13.5946	16.0627	14.5348	13.4376	21.4673	15.922	10.8514	21.1497	16.8871	21.4923	23.7768	17.5807	20.0679	17.4348	14.5757	8.55603	18.7988	14.9999	10.583	18.05	14.8894	13.4138	16.0927	14.775	13.2073	15.0046	17.7419	14.3374
Ces1g	4.48464	9.11837	4.80467	4.76006	3.94708	10.2138	6.32247	5.17914	9.95668	5.07298	9.8301	14.0693	7.65293	12.5365	11.7528	1.78258	2.93101	9.1084	9.58109	1.8633	9.76084	8.8579	4.16456	6.03578	3.58481	5.42067	8.88111	11.3735	5.301
Ces2g	6.80522	5.60601	5.37934	6.68241	6.75199	4.12519	6.06463	5.66162	2.7336	5.36498	3.14092	3.01567	4.64499	5.40888	3.57623	6.02783	4.6285	4.06878	4.99038	5.19453	3.10982	5.2522	5.57056	2.64718	5.57422	4.9	5.12049	3.24061	6.52026
Ces2h	24.1193	33.122	23.0283	28.148	34.9034	31.554	22.1211	27.1927	28.5926	42.3305	28.0002	16.7623	18.8788	15.8161	15.3925	15.7763	20.887	23.6267	20.0407	23.4744	21.163	34.0427	26.8152	19.6679	34.6617	25.4118	34.637	29.9497	33.1249
Cfdp1	24.3068	28.9554	26.7641	30.7917	37.102	28.9354	16.189	20.442	31.4508	39.8753	19.6879	17.7642	23.7331	21.0061	16.5493	17.0762	23.5512	23.7552	29.9633	28.7877	20.2986	25.2669	27.3849	28.8725	23.1438	30.8629	23.2089	20.6117	32.7145
Chga	22.2547	29.5276	24.3192	20.6744	16.1333	29.3468	25.6008	20.7021	26.0128	25.7347	23.0267	31.0987	31.3026	37.5946	28.2908	26.4015	23.5422	32.2161	27.2428	18.2428	23.2155	29.9517	18.8945	35.6411	19.736	20.2004	20.1747	35.0003	18.0783
Chrm1	2.81292	3.12048	3.70946	1.93343	2.24487	3.97917	2.98574	3.18279	2.16126	3.61123	4.72675	3.60124	4.30535	3.93051	4.43915	3.31441	3.87557	3.88609	3.57964	3.18446	3.32228	3.4815	1.98273	2.57425	2.73609	2.47736	3.55573	3.56651	2.19958
Ckmt1	539.991	519.329	539.841	657.994	809.7	367.327	509.217	655.713	385.916	649.9	379.877	434.291	635.238	388.47	401.116	561.355	435.355	462.41	502.452	629.635	404.6	578.674	657.778	486.55	836.988	719.955	630.938	441.426	677.394
Clca4a	46.9971	46.977	75.0681	46.812	66.2416	57.2576	45.4001	30.5893	39.637	78.3522	48.5501	37.3031	44.88	32.2435	27.9038	79.9221	82.2119	58.7577	78.4059	55.5076	49.8844	70.1933	50.1034	34.8205	60.0936	48.6584	58.0435	52.8098	69.7852
Cldn7	299.099	220.422	208.364	223.509	233.238	281.201	233.293	218.818	232.627	170.719	581.897	274.526	287.988	310.116	254.213	316.648	225.986	221.884	192.905	244.401	226	250.749	321.671	365.181	200.337	225.582	219.249	225.917	198.053
Cldn8	71.2814	68.0593	54.4435	81.1261	93.142	67.9111	59.5518	66.9491	65.7909	59.6142	40.1357	47.5777	62.2588	52.6826	32.064	57.4584	59.8743	60.8796	70.7903	59.6768	55.2	60.3851	68.9137	54.1966	72.4973	56.2773	56.5875	39.4664	79.2253
Clec2e	10.4301	12.5771	11.156	9.86758	11.942	13.8122	7.43868	7.38844	16.5949	11.3443	13.4537	20.2467	13.9988	14.3852	18.5979	6.25227	6.93991	16.9064	15.6082	22.1069	15.6688	16.1106	10.2783	13.7963	5.76171	8.98036	12.9602	16.1373	8.18932
Clic6	23.5214	24.6998	20.3372	23.6716	21.2541	16.6456	16.1159	24.9448	17.2527	19.5636	16.9484	17.1748	23.8206	16.878	12.2096	19.5639	17.5237	16.0604	17.8792	21.7439	17.7068	17.2732	23.5324	14.1771	22.487	20.5799	18.5632	10.0197	20.1089
Clip2	25.3328	24.7887	22.1421	21.9264	17.8054	23.2096	25.6827	25.8776	19.8192	19.9266	27.2701	31.6813	29.8686	27.3466	30.8596	24.5661	23.466	25.0869	19.6999	22.2444	24.8057	21.9733	20.8124	21.5316	23.2045	19.3589	22.8905	23.9115	19.1807
Cluh	27.4591	27.0822	28.1036	24.6835	16.6819	31.1538	29.8837	23.6499	29.2504	23.8165	32.8161	32.7024	30.0416	34.038	31.8626	34.8585	27.832	28.3697	24.9594	20.6118	27.7659	26.0018	24.9896	35.7437	27.2294	28.38	26.0708	31.5154	24.2332
Cnksr3	13.263	15.0683	15.527	10.4893	11.6139	11.3462	10.5769	14.5851	12.5502	12.6664	29.3056	16.561	16.0421	13.5552	15.6951	14.2294	11.9159	16.1366	14.3849	13.8467	15.1167	17.3732	16.8959	17.2475	12.5491	11.2882	14.5661	15.7652	10.7884
Col1a1	12.4505	10.489	10.0757	13.3133	9.72044	12.1478	12.4964	13.9301	11.8716	9.54913	18.7417	13.3777	15.8977	18.0602	13.8656	16.1814	11.0814	13.7167	11.1975	16.1207	14.348	12.8079	9.80323	20.3494	11.5762	17.2795	8.25465	9.0835	9.83346
Col6a4	1.43595	1.96217	2.80999	2.12419	2.12117	2.85445	2.17098	2.58139	2.1829	2.93052	5.04961	5.39742	3.36842	3.70284	3.32801	2.48303	3.32056	4.08921	3.2139	3.96055	3.05087	2.24313	2.34832	2.96306	2.87929	1.84696	2.7375	4.79264	2.07166
Cox19	48.5925	55.5816	45.2293	47.7789	95.1026	52.956	33.6264	45.3947	49.0447	41.7119	48.8215	46.4748	31.6829	34.1157	40.825	37.4288	48.6486	33.8225	39.5964	51.9589	37.1774	41.4811	67.8815	40.0884	59.8056	39.8851	60.5388	67.198	47.3033
Cox5a	18.1191	16.6058	15.9471	26.7025	26.5691	18.8014	28.8658	36.2625	21.3701	27.8154	34.293	33.0258	34.1471	29.1515	33.9694	31.8724	22.0989	19.5059	15.2501	30.0699	23.1888	19.6037	19.5892	31.0079	29.0125	35.7837	24.0287	27.7149	23.7131
Cox7a2	50.4613	59.6012	53.7154	50.2027	116.163	51.0993	42.6709	52.5329	60.194	54.6979	44.4436	44.9724	39.4322	42.6539	33.7769	47.173	43.7948	49.4635	56.7402	69.9478	41.082	73.9681	82.8466	75.4897	61.6817	47.0573	78.831	53.1682	70.3818
Cpm	9.42041	10.159	9.51084	12.1634	10.3171	8.90896	9.90471	7.96067	9.93424	9.91787	5.83164	6.8883	11.8658	7.29388	5.01207	8.97924	9.06314	10.8618	10.488	8.38396	9.93857	11.2186	10.8927	8.39657	11.08	9.07003	10.1881	6.65567	11.6433
Cpq	29.8117	27.1176	29.6061	32.9307	43.1468	26.8905	30.0727	28.2219	27.1564	36.6826	23.2109	22.3486	27.0036	22.8275	18.0706	23.2258	24.0937	24.108	32.5863	34.4685	25.8463	34.8798	33.5507	25.2037	31.7517	26.1164	30.7338	21.1977	32.1447
Cracr2a	17.8767	12.9865	19.6402	20.5615	17.6179	22.3534	34.5054	26.7916	23.8206	19.1854	34.7833	16.2555	16.7905	30.5818	35.4909	20.2216	30.7768	27.4695	26.1178	19.8938	19.6157	14.522	18.5475	25.4475	14.2912	22.1344	12.2774	21.8932	26.9537
Cyp2c65	27.992	31.5783	27.7688	18.7377	18.0804	36.1865	25.1589	11.9062	34.803	23.972	32.2679	45.7635	32.0398	49.3144	46.1287	23.2727	24.6566	41.5851	39.4674	22.246	45.3946	36.4187	22.4923	36.9493	19.3949	16.622	29.4287	50.6505	20.1897
Cyp2c68	7.62216	8.16185	6.64772	13.0418	15.3688	6.40801	5.56462	6.99756	8.02172	10.7824	2.31697	6.36774	8.67493	4.97739	3.57247	5.81453	5.21961	8.18522	9.45247	12.7361	6.04313	8.34361	11.1323	8.48514	10.208	8.67446	7.58353	5.4075	12.6498
Cyp2d10	20.024	12.944	16.2832	18.7698	17.9571	16.6178	18.0511	27.9683	14.7781	21.9008	7.85225	13.9886	20.7729	10.5981	5.91879	14.5265	7.46621	17.3406	16.1656	15.8702	19.9899	20.1859	29.7388	22.4361	32.2586	23.4619	24.3086	20.3267	22.7165
Cyp2d12	11.3648	10.5036	9.10911	13.3138	16.8374	7.79947	11.5044	19.9767	8.60319	17.8156	4.62308	9.65707	14.0849	4.45205	6.9508	5.68144	5.14751	10.5392	15.8208	5.98182	6.077	13.2788	18.9015	7.19632	25.9474	16.8206	19.577	8.61748	22.8324
Dnajc19-ps	36.1627	46.8204	31.5979	34.4805	72.1646	27.4233	25.3067	32.4596	30.05	38.3124	21.3504	25.0317	34.4446	20.597	27.1825	33.7623	30.7074	23.1806	23.9366	33.488	21.7906	31.9167	35.4429	37.0077	26.8099	23.0213	37.4078	36.8981	29.1465
Dstn	380.161	411.66	386.964	390.64	540.548	382.273	370.967	336.661	358.817	371.241	318.205	300.588	299.815	328.005	287.814	333.72	392.847	423.768	414.058	427.6	331.483	401.429	431.689	340.262	374.111	361.414	447.771	359.095	447.641
Dusp6	52.3947	51.0206	52.7387	66.852	57.3594	43.1356	39.0156	49.4418	43.3019	49.3125	35.1474	44.0095	60.7502	38.7815	36.8862	51.5976	54.5736	40.7508	45.4156	31.3645	37.2212	48.7822	34.3526	44.7687	62.0909	50.4498	46.5414	41.3817	58.9444
Efemp1	6.91234	8.04138	6.11097	7.13568	10.1597	3.32531	5.03543	4.80419	9.96383	4.88682	3.80607	6.08489	2.75611	5.32888	4.17061	4.92591	5.47421	5.59039	7.80912	5.27623	3.30022	8.22353	7.40437	8.36356	5.538	6.57943	5.29339	7.21968	7.0884
Egln3	14.024	11.5737	9.45864	18.9609	17.1685	10.5148	19.935	10.1701	15.3559	12.7002	10.1121	9.32291	11.6206	12.1033	9.50645	15.1877	12.3016	10.5146	10.3455	14.0186	9.7913	11.6635	14.2091	17.3979	20.02	15.7566	10.0033	9.86271	16.2462
Ell3	3.47077	4.33702	3.45321	3.95837	6.31661	2.60752	3.44782	2.4769	3.48426	3.40549	0.98439	2.86741	2.73777	1.50921	2.78109	1.62399	2.50422	4.25373	2.36236	2.15221	2.23204	4.20827	2.61	3.37821	2.04293	2.16692	3.80729	1.66712	4.26726
Elovl7	11.7955	11.8973	10.6509	11.7716	10.6239	10.6021	8.71899	11.3257	12.1285	10.4357	6.60259	9.24571	9.40781	9.11555	8.38585	10.4481	9.94607	11.7762	12.613	11.201	9.13161	11.6832	8.66706	9.15467	9.20433	8.96732	9.95149	8.95601	11.2479
Eno3	31.9982	25.9902	20.1643	32.1976	41.8868	17.5817	25.6772	42.9645	25.7213	36.5438	11.5449	15.4624	29.9077	14.6741	12.4038	24.8958	11.6968	22.2583	25.0327	22.5755	13.1251	26.8879	41.1468	22.5556	56.5417	41.5503	31.8746	14.6487	37.4836
Erbb2	30.7407	33.2805	33.0893	28.3598	23.6177	31.0669	30.7237	31.6385	35.8883	33.9604	38.1646	41.8922	40.0142	39.9045	41.3003	37.3128	27.5481	37.6598	32.51	34.6591	38.7835	35.0787	33.4519	36.0158	33.7836	38.2629	41.25	39.6166	31.1218
Erbb3	41.4485	37.0534	45.9037	38.4975	33.469	35.7162	38.5755	44.3696	35.418	42.1777	54.5944	57.0556	53.9276	46.7348	50.4791	46.4223	34.2993	48.3964	45.7254	47.6534	52.3087	50.9273	47.2861	50.6581	44.8551	47.6758	50.3811	51.3581	33.9107
Ern2	21.9488	21.1954	28.5844	20.5008	16.3565	31.204	30.2663	26.1341	23.5869	26.0576	30.4262	30.4223	23.8188	32.0605	29.0734	35.572	26.9823	24.8716	24.7106	23.2233	25.3623	24.4864	24.0824	20.3762	21.8856	21.5586	22.9347	27.257	25.9848
Fads2	40.9822	40.6634	42.4683	54.6909	42.8993	23.0483	32.5999	42.8477	27.9909	47.5997	25.3964	29.3674	39.88	35.1536	28.0447	36.741	38.3421	32.9758	37.5991	32.0793	25.6524	32.5292	33.2266	23.9795	44.0795	52.214	34.9815	20.9774	41.4752
Fam234a	49.0617	48.7158	43.4256	45.9998	32.9134	50.9412	51.4958	52.0712	52.4018	42.2939	59.5474	52.8654	61.3421	65.478	50.8862	54.4092	43.7421	53.4457	40.3646	53.2669	56.5614	47.5607	40.3383	46.9608	52.8188	45.9074	40.6123	44.433	33.7103
Fkbp5	23.1563	30.5107	27.8176	22.98	16.1845	32.565	34.4401	27.1243	35.3525	27.6687	29.3973	33.3135	27.8384	37.0343	32.6534	38.4189	31.3879	32.4262	30.848	26.6415	38.1974	39.9681	36.6742	38.3885	38.7824	34.4941	40.7028	54.5139	41.0325
Fli1	4.07512	2.36723	3.94799	3.15104	5.0351	3.61007	2.23701	2.58699	2.82779	3.73075	0.993804	2.70289	2.52364	2.53114	2.76626	3.82699	3.51413	3.08432	2.53285	3.95468	3.10356	3.04453	3.17289	3.99232	3.57146	3.56737	3.32013	3.27973	3.38958
Fmo5	10.9534	12.3717	7.93206	8.5998	8.40568	15.5318	16.6054	9.04895	14.7697	9.39862	10.3023	17.6175	14.4995	15.1008	21.3735	6.17431	4.87293	12.139	14.9234	12.3557	15.3714	13.1455	8.43915	15.0412	8.41301	7.9707	12.9657	20.6862	9.53239
Foxa2	30.7008	33.6355	34.2458	44.5694	47.5421	24.5718	27.5842	33.9668	29.5582	34.1593	30.4976	22.9992	29.7136	24.1137	17.3079	30.0587	27.3075	20.7253	23.6875	25.8853	24.4083	26.7115	22.4646	20.6049	31.9507	27.5851	28.641	24.2976	25.6248
Foxp4	14.9301	13.0245	16.3094	17.1616	10.1399	17.2347	18.555	21.039	14.9971	13.0736	21.3635	19.4253	17.9144	18.0389	18.4221	16.1076	19.3423	18.2438	12.1025	15.2289	15.3275	13.7288	10.5463	12.6595	17.3679	12.2454	13.8235	13.8374	11.3352
Foxq1	12.0058	8.62814	7.2831	13.7682	8.38058	5.60519	8.62828	11.096	6.01951	9.23306	5.09012	5.08387	11.3389	7.32621	4.08316	7.25427	6.25783	8.50898	5.59651	8.20887	8.66845	5.60929	7.4179	5.1907	8.66001	8.1167	7.40723	5.22209	5.27043
Gata6	13.4989	9.31538	11.3776	10.1356	7.47772	13.2704	12.35	15.4695	11.7424	11.5287	17.6759	13.6372	14.2488	14.9496	14.8373	15.2342	11.3504	11.1468	8.86195	12.3505	12.6769	12.6454	11.4213	15.02	12.6485	11.4538	9.53765	12.4162	9.73198
Ggh	29.2868	21.3189	18.3171	26.0639	49.0991	11.3356	22.0955	27.6346	23.079	32.3155	11.0889	20.2571	21.4772	15.9132	15.2171	23.3758	15.3853	25.8804	32.1049	44.1542	16.3271	30.0115	38.1152	29.6232	26.1417	25.8862	30.7871	19.0178	36.1546
Gk	7.72526	8.39874	5.11907	7.28677	7.53205	5.59885	6.15012	4.50601	8.358	6.5205	5.30166	3.81793	5.60378	5.04602	4.37989	4.88619	5.919	7.89918	6.13079	4.49915	4.33429	6.88765	6.42599	3.50228	5.9505	7.0305	5.86887	3.83805	7.08845
Gm11127	3.94046	4.09914	4.21081	5.20551	2.13866	2.70522	4.71096	4.05649	4.43579	3.95178	10.6684	7.55013	6.96455	5.94285	8.03859	6.60313	4.79483	3.53484	5.27236	4.31387	6.75272	5.07722	4.68796	10.7481	5.01196	2.75749	7.09251	5.66313	4.02831
Gm12669	37.3756	36.4467	28.5722	28.3959	43.7493	32.5325	22.3064	26.6208	21.8963	44.1021	22.7143	28.1153	25.4496	26.5072	23.6163	22.8381	29.9409	36.0451	34.6177	32.5079	29.1427	35.2655	34.5373	16.9005	27.9378	21.9954	32.4604	29.8438	38.6616
Gm26232	8.34262	5.419	6.39836	10.4388	11.8683	8.11275	11.1193	8.11772	8.01533	4.66731	45.169	9.80555	11.5564	12.6278	10.6011	7.85309	5.91719	11.1165	7.89725	10.1837	7.12366	11.305	16.6079	14.3508	3.78665	20.3027	8.51991	7.51182	8.31486
Gm32728	1.72677	1.36411	1.94634	1.27806	1.27362	2.35749	4.07084	1.46203	2.79914	2.55902	2.5424	4.86483	3.85572	3.58441	4.70002	1.34162	1.84817	2.48364	3.35582	2.38235	4.89948	3.88932	2.69612	3.4892	1.78595	4.47619	2.57165	5.54897	3.10206
Gm33901	18.5778	16.5805	15.3876	21.1268	23.9785	15.482	21.4035	18.7723	23.4726	28.7846	10.4453	11.7965	18.3591	10.6746	13.7956	14.659	13.9194	13.8302	20.4417	12.4285	16.6347	17.4578	19.3934	11.9478	23.1866	27.3707	17.7576	13.6646	32.2622
Gm39556	3.72041	4.38197	5.32014	4.21834	6.42732	3.5142	4.35633	4.05738	1.76399	0.750716	1.38849	0.861035	3.67832	3.12815	1.86384	2.57994	3.84247	3.07571	4.82531	2.42038	2.09371	1.69033	3.28478	0.931165	2.99849	0.655263	2.46615	3.64378	3.61319
Gm42368	9.65685	8.72563	10.08	11.1638	9.09086	13.7147	13.0364	16.0796	11.3905	6.67658	16.4067	12.1803	9.77579	13.8844	18.3729	13.0726	10.8935	14.4785	7.94664	8.7886	10.4023	9.72507	9.48055	18.0364	9.28074	5.4441	10.2986	10.725	9.12904
Gm5593	5.94658	11.6357	7.78029	7.8998	16.9717	6.64081	8.13295	8.17625	4.47194	10.2274	7.58477	5.62984	6.84286	5.3086	5.28265	6.30808	9.84859	7.32692	7.63908	6.43104	5.83307	9.26029	8.10949	12.3865	10.2077	9.53393	9.18637	6.93007	7.30528
Gm6086	11.0342	10.3796	7.9906	8.70831	10.0186	7.68839	8.03601	7.79839	8.44943	9.49958	5.12281	5.1741	11.7107	7.40753	4.3269	8.76539	5.15076	11.213	10.8934	10.6097	9.38824	8.7167	11.2014	4.27717	8.31774	8.74636	9.01151	7.54957	9.87865
Gm6787	6.76334	9.26634	6.24036	9.10686	12.0719	6.47736	6.61638	5.36934	4.51743	4.70385	5.17369	6.208	4.35389	6.85867	3.24316	5.04731	7.10802	6.04579	7.58869	8.26119	5.86222	5.4285	6.4524	5.25477	6.24252	4.42373	6.49775	6.91922	4.42887
Gm8909	5.23738	7.2436	4.07351	6.40157	4.43796	6.42731	7.61963	6.31034	7.12588	7.48941	13.3995	11.2244	7.95791	11.171	9.54289	8.47258	3.38352	6.14123	6.89333	7.77657	7.70205	8.21965	8.59388	13.5897	6.34661	4.06902	8.68744	10.0403	6.94818
Gm9780	16.8127	11.227	14.6081	15.621	18.9667	6.76857	13.5568	9.95236	9.47883	13.5254	9.84897	9.08852	14.0323	9.71947	5.41046	12.4955	10.5964	7.69392	7.29301	12.1228	10.3889	16.463	15.3389	12.9525	14.5546	11.597	11.5268	10.8739	14.6832
Gm9794	729.735	659.872	578.846	673.855	991.456	664.009	642.16	598.57	636.979	744.212	554.357	567.222	608.883	515.286	592.682	485.889	600.344	631.169	750.876	864.646	559.559	651.815	894.703	786.737	681.148	670.757	622.53	567.105	713.45
Gm9840	126.419	126.332	99.8766	120.14	180.022	128.098	101.126	102.115	87.4602	85.9417	142.475	91.905	79.4799	67.2504	89.9194	80.6448	102.719	88.4309	81.8013	119.539	82.1045	105.342	145.532	128.826	127.743	109.872	132.798	114.561	91.6625
Gna14	25.3569	21.8784	20.9798	23.1569	33.3362	19.1145	20.3497	24.615	14.672	22.7637	19.9946	16.7381	25.9847	16.4439	14.2808	24.6084	17.789	17.2312	18.8216	26.5568	21.256	23.6981	24.5469	22.1537	28.9929	25.9418	23.3938	22.1755	25.7046
Gpr137b	15.5556	9.44524	8.60811	13.8209	15.2238	8.21785	10.9584	10.5641	7.95356	14.0003	7.69777	7.55003	10.7931	7.12592	6.43559	12.1584	8.85482	13.1102	9.18551	13.705	8.02182	11.0094	12.6153	8.83614	16.5616	13.8965	10.3516	6.66399	15.4745
Gpr137b-ps	12.5505	8.31505	11.2124	12.9723	14.7791	9.07098	11.8508	12.0193	9.55331	14.0297	8.34633	7.76938	8.6113	8.55618	8.6103	13.044	8.5942	11.8489	10.6565	14.4541	9.47672	12.8674	14.3783	11.1216	16.9187	12.1886	10.8193	8.32109	15.8332
Gprc5a	133.123	123.569	133.295	146.469	126.663	112.648	125.978	113.804	78.9781	131.733	88.6638	85.4646	109.342	88.2338	84.1329	173.244	188.715	109.551	110.603	145.874	86.5257	111.602	101.135	83.2222	168.859	105.706	112.232	101.535	138.21
Gpt	7.8923	12.2753	13.1408	11.1642	8.74137	13.1903	12.8343	11.3638	19.2831	13.2498	14.6581	17.1683	20.8593	12.5124	14.3621	12.8075	8.6539	13.4275	11.5416	15.1637	14.8039	15.0519	10.7182	16.7756	19.0099	15.6367	20.171	26.5542	16.3286
Gramd3	26.4309	32.7792	29.3103	24.4058	28.5268	39.0458	34.072	24.7501	30.8444	29.5751	37.3015	41.9622	35.8905	32.8021	37.7498	29.8297	27.4639	32.5148	31.193	31.3065	34.5728	29.1263	30.2871	37.786	27.8062	25.327	34.6159	40.2259	28.1272
Grin3a	3.32755	4.19113	2.78444	2.75717	1.74567	3.56295	6.28177	1.85968	4.86376	1.83643	4.03964	5.62878	3.53504	5.95897	6.60086	3.08162	1.79439	5.31902	4.84795	1.61883	4.59276	4.76272	3.92419	4.63498	2.65046	3.96295	4.27269	9.64176	2.31183
Gsdmc	6.66547	5.52469	3.10507	8.36332	6.30361	4.56024	9.42605	8.23369	7.29092	4.6502	11.777	3.79381	7.33682	9.32617	16.9879	6.46501	10.747	7.08562	5.65089	5.88261	4.96449	6.21654	4.41201	7.71483	6.33444	13.3624	5.3077	4.81713	11.9997
Gtpbp10	4.99423	6.48825	4.37926	4.81255	3.87522	5.35173	7.43064	4.57038	4.68553	5.42655	1.62062	2.25921	3.97666	3.5001	3.901	2.33033	4.50695	5.18157	4.37235	4.38394	4.60028	4.50591	4.30209	4.02905	4.73755	6.85947	4.58108	4.07214	5.90102
H2-DMb1	7.95347	6.85794	7.39086	11.9668	6.84204	1.97212	2.9755	9.96099	3.88962	5.40921	6.6058	3.8339	3.6634	4.23382	3.04434	5.64268	6.73148	2.97625	6.14487	6.60562	4.11431	6.53024	13.3813	5.27737	7.8092	12.3303	10.8049	9.93315	8.26771
H2-T3	9.55765	16.1276	17.0906	9.85501	8.32753	16.7723	12.4093	10.2561	13.7055	8.84027	20.3629	24.1	14.0718	16.6309	21.9203	11.9272	8.73674	14.0589	16.5444	13.0621	19.114	15.0103	10.1695	20.3632	13.3508	12.6545	17.8493	35.2807	10.823
H3f3c	165.169	207.655	122.399	136.741	236.833	137.566	169.547	135.39	109.087	126.742	162.681	133.666	118.27	105.926	109.935	97.5963	114.891	116.034	145.119	171.962	129.382	156.938	209.448	131.407	156.699	126.34	184.321	155.462	133.207
Hao2	71.1692	89.0759	94.2457	83.2104	137.246	69.4322	74.5137	74.2724	80.6297	140.045	44.2238	75.8203	98.2315	53.7126	57.2999	79.3536	72.8832	80.6256	94.4818	124.363	91.0977	94.2567	116.605	87.0605	98.1169	100.212	100.292	90.0128	116.883
Hgfac	46.3105	44.8675	51.5689	49.7068	43.0569	41.6562	52.3052	50.0134	43.9772	43.827	71.8443	57.2995	60.8147	65.0083	62.7889	69.5492	49.7974	46.3873	47.9491	51.6615	50.7367	47.7943	49.4027	59.0221	55.5866	43.46	55.4315	64.1415	41.0786
Hif1a	32.7695	38.6643	27.4409	38.7275	36.3131	33.4726	35.9095	29.196	32.8112	35.331	22.7722	22.0132	27.3176	25.3826	21.7135	35.1742	37.6444	27.6207	29.5939	34.1676	27.8893	34.3662	36.8095	32.7998	44.4206	31.562	27.7974	21.001	46.8933
Hkdc1	7.55634	11.806	10.9275	6.42895	4.45373	8.99125	8.26422	5.52139	10.5268	7.50423	10.5635	13.2811	12.4358	12.0426	16.2118	7.63518	7.08951	11.2387	10.8914	5.58491	11.7068	10.902	6.25419	9.20218	10.3631	10.1694	12.3449	19.0793	8.97306
Hmgb2	35.7802	37.124	28.7346	35.4811	55.0719	29.8206	23.7569	35.9033	24.9008	33.1401	25.5571	21.4551	30.5215	29.8134	23.1588	26.4983	37.4971	31.2468	38.1301	37.2099	29.3419	36.0745	29.5691	36.6353	34.7809	38.4538	42.5527	40.6044	35.1422
Hmgcs2	110.463	225.908	182.092	112.523	137.127	213.057	208.531	133.347	222.794	185.165	252.691	270.233	184.824	233.354	226.283	169.157	122.5	228.709	171.53	196.899	280.322	219.835	161.966	294.461	145.71	136.002	262.392	396.811	142.217
Hmmr	4.10577	4.41071	3.55251	3.05627	4.7917	3.23051	2.59715	2.80573	3.23107	2.49871	1.99722	2.4227	2.53813	3.08749	2.37258	2.74435	3.60918	3.08155	4.06618	2.80474	2.60919	2.7933	3.73258	2.75279	2.99354	2.42828	3.15156	3.16323	3.96813
Hnrnpa0	31.3548	32.9928	27.1248	27.3001	21.4204	34.956	41.1764	35.0859	42.5176	23.5142	64.1909	30.5552	28.8025	45.9016	31.7144	35.1475	25.5541	37.331	23.0807	24.2117	34.2426	23.8444	25.2407	48.0622	24.1757	33.7845	22.2907	25.0853	22.7268
Hook2	10.3436	9.07621	13.4102	11.4113	9.00445	12.8746	13.5246	13.5995	14.1199	12.4953	12.9305	15.4042	15.8355	15.3128	16.1453	13.0882	10.574	13.4369	11.2067	14.0323	14.668	14.4228	11.5043	12.9277	10.9732	14.7284	13.4589	14.8719	15.9018
Hottip	14.1468	12.147	12.5425	15.3713	14.0336	11.8943	12.4607	15.8247	14.84	16.0833	7.99518	7.36802	12.27	7.68576	8.38018	11.6705	12.7021	15.3305	13.7954	13.4867	10.2069	13.3993	12.7264	10.6859	13.4563	15.2564	15.4322	8.20344	16.6633
Hoxa10	23.3815	21.305	24.9431	27.3709	28.7311	23.8077	25.1624	25.3631	19.7251	22.924	16.6917	20.0905	18.658	18.2606	17.9164	24.9928	30.619	25.7405	24.9831	22.5445	26.0955	21.8417	23.91	20.0618	26.5064	29.9834	24.8127	18.9531	21.9598
Hoxb13	250.673	171.841	159.558	253.469	252.47	111.739	160.556	222.057	141.636	204.074	126.906	110.067	227.084	119.592	79.5225	181.241	111.581	145.132	148.26	211.561	103.965	184.415	243.743	172.077	298.218	255.402	214.961	83.5571	206.125
Hoxb3	3.21284	4.23653	6.10826	3.93529	2.77171	6.65274	6.49901	5.51677	6.07255	3.70494	5.13323	9.17325	6.69542	8.61686	10.1729	3.69684	3.80965	8.44071	5.79738	2.6654	9.19262	7.12029	4.00754	5.34312	4.42163	5.93826	6.59019	12.816	2.81789
Hoxb6	14.9016	25.1595	18.3663	14.1605	10.2249	18.8952	24.9813	11.951	14.3104	6.0438	10.8769	26.5774	19.9918	28.1381	39.6723	7.57287	8.16832	16.8739	14.8177	6.40043	22.5281	19.8443	7.38883	31.3842	13.3072	11.2717	18.2775	42.1106	6.5895
Hoxb7	5.08158	9.52504	5.13624	4.71608	2.52155	9.54891	10.7208	3.60471	7.09397	3.79505	11.3796	10.543	7.08592	9.39545	11.3096	3.95768	2.9236	9.80137	6.02604	2.5102	7.57986	8.12062	4.38062	9.93031	4.27763	6.61402	7.56461	12.3296	2.79256
Hoxb8	1.28011	2.98974	2.70116	2.49923	1.26263	3.01388	5.08834	2.65027	1.79605	1.23024	2.80596	5.41752	3.3781	3.11147	6.864	0.865942	0.891349	3.43019	1.683	0.437997	2.98741	4.58224	0.0940192	3.21008	2.46224	1.93414	2.50534	4.35941	0.403904
Ifi44	3.02544	3.34987	2.5976	4.16924	2.97329	0.467598	0.141579	0.81527	0.223167	0	3.81297	5.01202	4.02334	5.5057	8.14774	1.62775	2.87566	1.38424	2.69498	2.12078	1.60705	1.02099	1.53112	1.94867	1.56391	2.18769	2.69654	2.45392	1.18261
Ifngr1	106.993	108.07	105.116	126.921	162.37	90.5768	94.6171	104.893	94.1868	123.698	104.388	90.7817	102.846	90.2693	86.6391	106.797	98.0423	96.1551	108.248	130.975	98.548	122.316	144.147	114.293	122.439	133.753	121.507	110.979	125.466
Igbp1	42.6873	48.1424	39.5329	47.126	66.4521	35.4088	39.4931	36.4322	40.7133	48.9762	42.202	36.2176	40.7	26.1762	33.4675	31.421	30.4893	34.1776	41.7648	60.7802	45.6531	45.359	55.7164	47.6125	41.4825	44.6039	47.2812	44.7433	45.5728
Igdcc4	6.48745	7.66832	9.05588	6.58994	4.5309	8.70277	9.87003	7.64705	8.24609	7.37159	9.03561	12.0408	8.75815	10.1079	9.92428	8.81712	6.8687	9.26787	8.90552	7.55519	10.0103	7.65895	7.65438	8.84689	7.09387	9.12835	7.01776	9.56398	6.95135
Igf2bp2	10.6447	16.1867	11.4009	10.8152	9.3094	16.4821	15.1453	13.9415	12.5021	11.1994	17.8487	14.5324	14.1696	16.2428	18.644	11.6888	15.0495	12.149	12.807	10.952	11.9603	13.1188	11.4659	11.5167	12.9824	8.20128	11.3441	13.7632	11.023
Il1rn	14.1212	12.1047	9.20356	15.3113	13.7722	8.68161	14.1335	8.61361	9.43105	12.6361	10.6391	7.77548	8.86259	10.8549	7.5368	9.26997	11.3424	10.7502	9.77419	13.5597	8.11278	13.1954	10.3785	9.14787	9.97028	12.894	7.91461	7.3902	12.815
Inpp4b	4.43145	3.68005	3.34068	4.09141	3.6084	3.424	3.37902	3.2215	3.85477	3.5838	2.56082	2.84604	1.98938	2.8967	1.75786	3.79134	3.19098	4.1855	4.03613	3.362	2.97057	2.87769	3.59078	2.72671	2.26235	3.47942	3.67048	2.90003	3.78726
Insl5	85.5452	59.1653	66.4238	66.7482	110.328	65.9707	61.9596	81.3934	55.7279	77.492	22.231	41.9408	67.7717	42.8159	28.0792	72.6071	58.0044	59.7884	62.6252	132.718	41.491	90.5831	76.7735	54.9515	84.6057	81.5327	53.2137	38.9855	102.298
Isx	40.5812	54.9723	51.6418	23.4715	34.5992	69.7231	55.3677	52.4099	34.3381	50.8588	50.035	83.26	54.7978	66.0589	75.6309	32.6966	50.9674	49.2148	47.4253	34.535	60.2634	79.8083	35.8068	42.361	38.3651	28.9073	48.6739	83.5982	35.0271
Itln1	5.3499	2.03921	1.21011	13.1346	5.22889	1.25533	7.56931	5.96802	1.77886	0	12.0974	0.31272	1.52212	10.1267	23.1887	1.32157	21.2051	1.98625	5.44609	3.07238	4.23624	0	1.413	0	0.724964	13.2648	0.224754	0.56806	4.12351
Kbtbd11	14.9665	23.1855	21.6922	13.5283	15.2147	21.2112	18.7389	23.4939	24.6368	19.1341	24.1657	29.4775	23.1908	23.156	26.9897	19.6622	16.5417	22.3371	18.0958	13.9935	22.7634	22.5411	17.7355	22.4497	21.4616	19.339	23.2127	25.7796	20.0975
Kcnk6	15.5438	15.1859	16.8514	11.5385	11.2381	18.3326	16.7068	19.6657	14.8389	16.7671	20.6159	20.1535	17.5655	21.4262	20.0172	18.9989	22.2119	18.6037	16.0816	15.8447	20.2761	16.0191	13.4787	15.7875	12.661	13.9267	14.7762	21.0914	16.751
Kctd9	4.56522	5.20003	4.07747	4.8548	5.42407	3.76412	3.38061	4.05267	4.77779	3.01571	2.52182	3.13178	3.28225	3.54483	2.96904	3.85236	3.58887	5.22303	5.10019	5.44962	4.21769	4.72393	5.27853	4.3115	4.40899	3.86384	4.27168	4.04564	5.06933
Kdm6b	5.95244	6.01108	6.66697	5.09737	4.60216	8.10093	7.87496	7.41025	6.97571	5.22992	11.2113	5.91076	6.59432	8.93852	8.31192	7.3316	7.49119	8.16865	6.07253	5.5678	5.62558	5.8337	3.85732	7.72446	5.18426	7.26482	3.76163	4.45425	4.35424
Khsrp	29.2232	25.8041	29.5289	29.6921	19.0471	26.4982	27.2575	34.0563	28.5192	26.7194	39.4596	33.1424	34.8559	34.9088	30.1693	34.1179	29.8127	27.9316	22.4895	22.0669	26.6295	21.4159	23.4971	27.5982	26.1005	26.1266	27.5086	24.898	21.5372
Klf13	19.661	16.7094	19.3729	16.9402	10.4187	18.8678	24.9366	20.5762	17.7424	15.7851	25.0535	21.2285	21.1532	23.2867	22.9898	21.7464	22.8655	20.9465	17.4758	17.5492	19.1662	18.3795	15.8495	19.1121	16.2805	17.993	16.1758	15.1326	16.2266
Kmt2d	12.9307	13.7779	16.5417	13.5051	9.48669	18.8033	15.0652	17.7753	17.3995	14.0665	22.5587	15.0139	15.0968	19.6408	21.4083	16.0837	17.1273	18.734	15.5952	10.8126	15.8338	12.2813	12.2	17.0443	10.8157	14.5151	10.2234	11.6411	12.875
Lars2	235.157	87.923	32.5113	20.37	13.0578	22.3482	15.2174	42.2432	2187.49	32.3692	24.9875	38.3199	32.5723	32.1427	83.0517	18.4433	19.5866	11.0701	16.8022	30.6874	29.4148	19.5454	18.4462	38.6506	21.5273	13.3632	17.7579	7.49117	25.0019
Lmtk2	15.2704	15.9557	16.4772	14.2368	10.7421	18.5302	16.96	17.7439	17.0772	15.4592	21.0702	19.5921	18.5777	19.9132	21.0446	18.8379	16.2215	16.5131	14.944	12.3826	15.7769	14.0368	13.6778	16.7366	14.2405	14.4399	13.46	13.338	12.3012
LOC102640024	23.0543	21.9235	14.5842	17.5408	21.0804	14.0841	19.6689	11.3813	13.9386	13.1733	13.3117	10.5177	11.5104	18.7799	14.9387	10.6978	17.2983	23.3269	13.8848	17.034	16.1541	12.5357	16.2013	10.8557	10.328	18.1031	9.80343	10.9635	13.6309
LOC102640468	6.47611	5.86606	4.83077	6.39198	9.96981	5.73771	5.92797	4.98098	5.14447	5.94964	3.95096	3.64109	4.8202	3.96977	3.16308	3.67775	4.86976	4.45995	5.56736	8.32224	4.82487	6.14954	9.31958	7.0339	5.73259	6.33218	5.88135	6.77882	5.52437
LOC108168162	6.81138	9.41869	22.5002	18.3798	20.4966	16.1419	16.9091	22.9067	12.5941	5.90668	9.96413	22.2832	21.6775	39.0621	28.1374	19.8742	17.2936	37.8532	13.1359	21.257	13.8172	9.37515	20.6008	5.60597	19.0764	13.8349	29.0565	16.0258	3.2637
Lpcat4	4.24775	3.44158	5.04989	3.2283	2.54494	3.40165	4.50054	4.77539	3.03453	3.77011	7.28212	4.99821	6.93936	6.57903	7.93074	6.04021	6.22361	3.22014	2.56966	3.74543	3.40095	5.78606	2.27228	2.94266	4.64884	4.24712	4.58861	5.64481	3.43948
Lpo	2.81865	5.36498	4.21504	3.05562	2.78499	6.16713	4.46636	3.70176	4.90721	3.73739	8.11764	7.12917	6.45643	7.01261	7.67632	6.28511	5.00576	6.20861	5.51726	3.37825	9.06344	5.24591	3.63375	7.4515	5.78298	4.48157	5.07431	10.4026	1.82597
Lrp5	13.6038	11.0733	14.8951	13.0709	8.17953	13.4182	12.5913	15.5072	10.5024	10.9111	20.7091	16.7333	14.2699	16.2925	17.5737	17.5102	15.4442	10.873	11.0748	13.2466	14.9136	12.4316	14.3189	13.0893	12.579	12.8715	11.0255	11.7601	9.92831
Lum	13.325	7.75211	14.9026	12.8307	19.9864	8.77088	14.0472	10.8017	9.67343	10.0486	4.67979	11.7112	10.0757	10.0733	9.23243	9.80481	10.6203	10.849	13.8017	16.4386	13.9368	15.1057	13.6319	12.062	14.0641	12.0361	13.1139	11.7495	10.8985
Ly6g	33.5188	17.3805	16.6375	27.6313	42.4384	14.592	24.94	30.684	17.5307	20.135	5.97661	10.2468	25.9598	14.7599	12.6729	17.3066	9.45242	20.1643	19.4411	25.239	15.1937	24.1006	40.9032	15.8429	54.5001	47.8945	26.3447	10.088	27.7793
Maff	15.8667	14.084	15.4602	19.9894	16.2098	13.5622	23.7975	15.9178	13.3313	18.6492	9.42201	7.78789	15.9523	15.0307	9.91582	18.7597	16.6916	10.4404	10.8743	18.0813	13.3448	17.5935	14.5388	13.4935	23.7508	18.1443	19.7852	13.8337	22.6932
Mark2	25.5932	28.5444	29.9494	29.6474	20.8897	30.5007	29.3678	32.4197	31.5981	28.372	37.8884	26.9174	37.2813	37.3079	34.6724	36.3999	36.4799	32.4804	27.4518	23.8259	28.9516	25.2603	23.8979	25.9629	27.5412	29.2379	25.7527	27.1698	24.8889
Mbd3	18.9429	17.4262	14.2163	14.0069	15.4912	21.8324	16.793	17.0884	21.9392	13.1718	28.7481	19.0224	19.7017	23.9993	22.7103	19.6917	13.9364	17.9757	13.3676	10.3992	17.9485	16.3305	15.9714	17.7951	15.1382	14.7614	15.002	14.4292	17.2951
Mdh1	57.0812	67.3229	54.2205	53.8079	82.9305	52.8761	53.9997	53.8984	56.0477	59.7579	41.5136	45.3387	50.4504	47.9647	46.981	45.7479	45.3818	60.702	57.5252	60.9265	43.7931	60.5672	73.3238	59.4237	60.0235	62.2093	61.8888	58.7745	59.0688
Med27	4.59127	5.29822	4.78425	5.00844	5.65389	5.30958	7.84975	5.73945	7.5012	5.81905	12.6745	6.64856	8.53941	6.43684	10.4721	5.8513	6.0219	6.82666	4.52613	5.97211	7.16996	7.9306	6.74634	5.93738	8.23504	5.89797	6.89679	8.19017	7.63648
Megf8	5.50117	5.00975	5.93344	5.19615	3.24551	6.8766	5.58229	5.82098	5.98645	5.67991	5.84133	6.78013	6.60911	7.37692	6.30568	6.61375	5.15326	6.39871	5.73836	4.5585	5.06447	4.83155	4.73075	4.75422	5.38516	6.75036	5.27032	5.91819	5.15417
Mfap3l	5.30139	9.62414	6.85811	5.30799	4.53559	9.06832	9.24491	5.33623	8.71719	6.42109	5.06536	10.1107	7.60189	9.46715	10.9489	4.47046	5.90744	9.3514	8.52819	3.48482	10.6299	8.16051	4.68433	8.87038	5.75565	3.00314	8.2167	11.3297	5.03918
Mgst1	79.4903	80.5784	64.1318	86.4837	100.15	67.7364	70.3159	78.3509	64.54	74.3848	49.9531	80.3788	58.629	64.5079	58.5738	63.1307	50.2002	65.0308	70.7438	78.9622	62.3173	76.8922	107.048	85.7223	78.087	93.796	86.8375	90.181	78.5656
Mki67	41.4031	47.2365	42.2342	32.952	39.9038	43.9396	28.1276	37.1692	32.8915	41.3651	34.6385	31.1609	31.9448	29.9985	29.544	36.1126	47.2561	40.1063	46.2971	29.3182	37.2591	38.8632	34.7322	37.6322	32.695	37.8537	33.3413	32.9437	39.4717
Mmp15	65.4824	69.7233	67.7325	66.9797	43.5257	63.9104	85.5858	82.6972	74.0838	70.4802	102.066	76.6263	70.6975	90.2469	84.1334	87.5252	72.0947	68.1981	57.7392	68.1992	75.9064	64.0362	54.8796	61.5299	72.6805	73.3674	68.4537	70.3194	61.5611
Mnt	5.76133	4.17456	4.30398	4.5978	2.2207	6.09627	4.59597	4.5365	3.99373	3.50736	7.37535	5.73707	5.9245	6.25082	5.52099	5.93141	4.62297	7.10651	3.91729	5.51432	5.11905	4.1894	3.78568	3.39456	5.97763	4.9916	4.3309	3.88737	4.52728
Mob3a	16.3818	16.8742	21.8166	20.6159	16.899	13.1223	17.7582	16.5686	16.0075	17.9491	11.7336	13.2023	15.113	14.0045	13.4934	15.8279	19.1033	14.144	13.3524	17.656	16.7352	14.6461	15.0311	15.1831	16.125	12.2859	15.7608	15.0785	12.5674
Mospd3	11.5805	13.8154	14.0341	12.2528	9.18843	10.1584	16.2765	20.3834	12.2305	16.2699	23.2262	14.8018	22.7171	9.56538	19.3083	14.6768	21.9627	13.5154	14.4932	13.2618	13.5903	15.8554	10.9054	8.47702	14.9275	19.726	12.3745	16.8707	15.2377
Mov10	6.81129	5.27531	7.22452	6.55718	6.03216	5.80443	5.06576	9.72301	7.11477	6.21658	14.094	9.12417	8.43592	10.3704	10.5813	7.87801	7.62654	7.37588	5.72913	9.24817	7.5007	6.16511	8.27158	5.75733	8.34351	8.49739	7.60173	6.30756	6.45998
Mtfr1	11.2406	9.93574	9.88357	10.4806	12.497	8.23422	7.84382	8.67369	8.38769	12.6655	7.28465	6.91064	7.53519	7.52009	7.07745	9.04673	9.04802	9.38157	9.57728	10.4061	10.0192	8.46186	8.92347	5.09804	9.65164	8.65813	9.17029	8.88978	7.01977
Myl12b	348.158	422.205	381.883	439.618	621.595	342.31	360.465	368.595	353.242	364.248	400.689	320.348	359.211	270.196	248.963	313.699	338.324	290.535	322.791	493.28	341.526	415.252	430.04	405.973	454.829	395.689	485.341	381.365	417.27
Myo7b	21.2512	20.7307	26.3448	20.2634	16.499	20.9156	20.3855	21.975	22.3268	22.1918	31.1873	28.5292	27.234	28.5566	29.0633	28.8991	23.9505	25.5016	23.4599	22.5937	28.8098	23.9413	21.8326	22.5644	22.453	18.096	20.9039	20.8009	19.2662
Myrip	2.40429	3.1131	2.64208	2.34766	1.5028	2.31054	5.33543	3.38836	3.12153	1.65029	5.54866	3.35127	3.12506	3.58048	4.12929	1.91956	4.31609	3.59439	1.8391	2.52141	2.2236	2.27119	1.8616	1.12365	1.97086	2.52516	2.02756	2.88271	2.98156
n-R5s100	219.219	155.345	175.889	194.047	356.915	394.504	604.387	510.028	372.374	145.32	636.659	525.857	512.796	1063.48	551.838	480.681	202.526	380.197	247.483	248.619	169.107	445.032	451.13	882.932	203.051	414.487	254.166	162.804	206.675
n-R5s103	575.449	155.345	205.204	426.904	421.808	535.398	664.825	680.038	591.418	96.8801	1114.15	720.619	461.516	1395.82	525.56	420.596	318.255	736.632	268.107	621.546	304.392	287.962	411.901	567.599	406.102	651.336	195.512	162.804	248.009
n-R5s104	411.035	194.181	234.519	388.095	389.361	309.967	423.071	510.028	525.705	242.2	636.659	486.905	538.436	1475.58	446.726	560.795	318.255	570.296	206.236	522.099	270.571	392.675	411.901	504.533	406.102	414.487	215.063	232.577	310.012
n-R5s108	274.023	271.853	175.889	329.88	421.808	450.862	483.509	637.535	416.183	387.521	557.077	584.286	717.914	1262.88	473.004	540.766	231.458	594.058	288.73	447.513	236.75	130.892	411.901	441.466	304.577	236.849	156.41	186.062	206.675
n-R5s111	438.437	155.345	146.574	349.285	389.361	507.219	302.193	403.772	481.896	96.8801	1034.57	525.857	435.877	1143.24	262.78	490.695	202.526	665.345	247.483	223.757	270.571	261.784	392.287	378.4	406.102	296.062	136.858	209.32	144.672
n-R5s113	191.816	194.181	117.26	271.666	454.255	422.683	423.071	531.279	416.183	339.08	636.659	389.524	410.237	1116.65	525.56	550.78	86.7967	522.771	329.977	248.619	236.75	287.962	313.83	378.4	304.577	296.062	136.858	279.093	206.675
n-R5s121	274.023	155.345	263.834	291.071	162.234	366.325	302.193	425.023	394.279	96.8801	795.824	311.619	615.355	1143.24	262.78	470.667	202.526	332.673	309.354	273.48	338.214	78.5351	431.516	315.333	177.67	296.062	175.961	162.804	227.342
n-R5s122	219.219	77.6723	146.574	194.047	292.021	507.219	362.632	382.521	416.183	242.2	477.495	447.952	666.635	837.49	315.336	460.653	202.526	451.484	350.601	248.619	67.6427	183.248	313.83	504.533	304.577	236.849	117.307	162.804	206.675
n-R5s123	164.414	116.509	175.889	407.499	519.149	422.683	664.825	573.782	547.609	96.8801	397.912	467.428	794.834	1236.29	367.892	480.681	173.593	879.206	350.601	323.204	236.75	314.14	392.287	693.733	304.577	532.911	273.717	186.062	248.009
n-R5s124	274.023	155.345	117.26	349.285	259.574	394.504	664.825	510.028	591.418	96.8801	795.824	311.619	743.554	1116.65	446.726	570.809	318.255	499.009	371.225	671.27	270.571	418.854	529.587	315.333	253.814	1125.04	175.961	46.5155	103.337
n-R5s128	246.621	38.8362	146.574	271.666	324.468	309.967	453.29	403.772	613.322	193.76	795.824	467.428	358.957	957.132	289.058	480.681	202.526	665.345	288.73	422.652	405.856	209.427	313.83	504.533	279.195	473.699	254.166	255.835	268.677
n-R5s134	246.621	116.509	58.6298	291.071	551.595	422.683	513.729	318.768	481.896	145.32	875.407	389.524	410.237	1116.65	367.892	610.866	202.526	594.058	247.483	323.204	169.107	235.605	431.516	378.4	482.246	177.637	215.063	186.062	165.34
n-R5s138	301.425	155.345	87.9446	310.476	324.468	535.398	513.729	573.782	591.418	96.8801	795.824	623.238	487.156	1169.83	315.336	721.022	289.322	712.87	226.859	348.066	236.75	314.14	372.673	756.799	406.102	532.911	136.858	209.32	248.009
n-R5s143	328.828	116.509	29.3149	388.095	356.915	366.325	241.755	616.284	591.418	387.521	716.242	447.952	564.075	1156.53	499.282	580.823	202.526	760.395	268.107	348.066	405.856	366.497	353.058	378.4	431.484	769.761	351.922	279.093	289.344
n-R5s146	109.609	233.017	175.889	407.499	486.702	450.862	755.483	680.038	679.035	484.401	1114.15	389.524	640.995	1475.58	315.336	831.178	231.458	641.583	371.225	522.099	372.035	523.567	627.659	504.533	482.246	769.761	371.473	255.835	248.009
n-R5s149	219.219	116.509	146.574	174.643	292.021	450.862	423.071	531.279	503.801	290.64	1034.57	545.333	384.597	1196.41	499.282	540.766	318.255	475.247	329.977	348.066	270.571	392.675	451.13	630.666	431.484	355.274	215.063	69.7732	351.347
Naaladl1	7.59479	6.59447	6.98278	7.31442	6.73961	10.2257	7.19616	6.0813	9.20672	8.81215	11.1484	10.5067	10.3901	9.29702	9.6297	7.14363	5.87467	8.92422	8.95178	5.83847	9.38587	10.2071	10.3277	15.2491	10.5577	11.5006	11.2378	11.6498	6.35419
Ndufaf4	4.71957	5.50901	3.49772	5.57844	6.05507	6.41448	4.21122	4.50989	4.7695	5.82587	3.23847	3.34485	2.85254	3.53575	3.23276	3.58704	6.184	3.81783	5.30795	5.05322	4.04626	4.67458	3.91184	4.21454	4.0623	3.10142	3.53507	3.6631	6.03715
Nectin1	4.14172	4.25221	4.08306	4.14757	2.24084	4.69876	5.66773	6.01497	4.95768	2.78572	10.1081	5.266	4.28533	6.44738	7.20449	5.81094	6.16046	5.41814	4.13219	4.25296	4.95995	3.80168	4.16385	2.99228	4.49231	4.74289	4.5601	4.04382	3.84041
Nfic	7.54352	5.98679	7.24104	6.30962	4.82218	8.38056	7.53035	8.36063	7.54063	7.38909	10.4142	7.03797	8.01568	8.21811	8.84915	7.18992	6.55779	9.01067	5.81492	5.69122	8.17282	4.98121	6.05501	8.16458	5.33735	6.44745	4.54078	5.56605	5.58683
Nme2	21.3214	12.6348	18.695	22.8298	31.5018	12.65	23.1097	31.9885	26.035	18.5798	28.27	45.6844	26.9648	29.598	38.3273	47.6824	19.6341	20.8677	22.3334	19.9642	19.8996	35.0429	40.1787	30.8187	26.0162	39.8388	25.616	26.2725	28.8697
Nop10	11.372	18.7706	16.3522	18.2565	32.9539	13.5471	15.2426	14.9569	17.302	23.2775	5.0712	11.4078	15.1765	13.6998	10.9132	10.1182	18.0877	12.341	19.8049	17.4637	12.1533	15.8678	17.7215	20.0895	11.3709	17.9408	18.4487	14.7151	15.8343
Nr1h4	24.78	34.602	26.4332	27.3019	27.9597	33.355	35.5297	27.99	31.3091	27.7546	49.84	51.2788	41.8512	35.7126	54.4897	26.246	22.5223	20.7533	26.3115	32.6561	31.3605	35.3587	29.303	47.0306	27.0282	24.8297	33.9129	55.24	26.1485
Nsa2	22.6118	21.3602	17.2401	23.4218	27.1761	17.0313	19.412	15.1419	14.8655	22.5098	17.4785	18.573	18.489	14.7047	16.1534	15.3058	17.7895	18.1039	22.8293	27.7419	16.9834	18.292	26.7341	20.3879	19.9411	17.9838	18.2828	17.047	18.2823
Nt5c1a	4.47393	2.77045	2.79829	6.06889	3.00844	1.74945	4.6223	2.35091	2.30751	2.28697	1.32638	0.835098	3.20788	2.80268	2.87166	3.3561	4.74198	3.30256	3.00354	2.15945	1.6961	2.39562	2.20135	5.38664	5.61008	1.46789	1.86506	1.04277	4.67745
Nt5c3	28.1968	25.8362	24.2932	30.8343	45.1223	24.6724	23.282	21.8359	24.5308	32.3825	20.8172	20.6984	25.1686	19.2809	20.5142	22.3693	22.0941	28.8009	20.6943	39.8614	21.7148	27.585	34.6646	23.0537	24.6553	29.5003	30.4546	17.5002	29.361
Nt5e	27.7775	17.1122	19.1466	28.8648	29.3008	13.0236	21.046	24.4688	21.1816	26.2701	19.9441	12.6633	20.6029	14.8297	16.5206	19.4673	17.9592	22.841	25.8245	35.4295	17.6743	24.5168	26.0852	19.1258	22.6461	24.4592	21.205	11.3206	29.5856
Osr2	4.82149	11.7882	6.14686	5.61767	1.68395	6.38421	8.44141	3.28446	5.17463	0.846038	9.41897	17.6268	15.3584	15.8394	21.9487	2.07415	1.22321	14.6495	3.76696	1.12055	10.3981	10.0778	2.85015	14.8612	3.8382	3.17615	9.31018	21.5097	1.85301
Pabpc1	37.3634	38.6834	35.8817	29.3952	23.3043	30.1206	35.6909	33.2653	36.5229	37.3695	46.9955	44.9119	45.0237	40.1153	48.1072	36.7566	32.835	37.2203	30.4813	29.8697	39.3016	32.3094	29.4745	45.2351	27.294	53.3745	29.269	30.9854	22.5169
Pacs2	5.87012	4.80379	5.87688	5.13182	4.55776	5.27306	6.2712	6.4958	6.46078	6.66203	9.40879	7.04546	7.36642	6.73029	7.57027	7.30713	6.37789	6.5913	5.23145	5.72954	6.87231	5.96079	5.33175	6.26995	6.57506	4.52678	5.69225	5.75911	5.16873
Papss2	41.0607	52.7133	48.4679	38.2681	36.3871	54.4473	50.3836	46.4616	48.7254	50.3357	62.3367	58.2973	60.7862	56.004	59.0346	48.0271	42.2797	58.7158	49.6544	47.2741	59.5397	56.7395	43.0094	53.0582	47.5453	40.4615	45.2502	58.4074	43.7756
Pcdh1	33.0363	31.3595	32.5445	36.975	27.7105	28.767	31.2043	37.928	29.5169	34.9159	49.1393	43.2977	37.9082	36.2371	42.3023	40.2971	35.6466	35.7246	30.2735	37.8105	35.1032	34.7721	36.7656	37.1124	39.0466	33.7006	33.6219	34.0574	25.455
Pck1	59.9784	60.1876	61.5984	63.4402	54.9259	63.3913	59.2524	60.8292	66.0043	63.8727	79.4773	84.1128	76.322	75.1824	76.443	73.6306	64.9678	60.0098	66.7507	71.1013	75.0103	73.8419	64.7508	77.5312	66.4493	71.917	72.7803	72.9777	70.8388
Pcsk5	11.5402	12.7001	13.944	11.3648	10.0701	14.1825	20.6772	16.1182	14.8123	15.4055	25.1891	16.7599	12.7728	17.3002	20.6693	17.3924	14.8589	13.0757	11.8318	13.9807	15.9408	15.1625	11.9331	17.8349	11.1054	9.99047	11.9232	15.0799	12.617
Pde2a	21.8633	26.2589	29.026	25.3494	21.1235	25.7499	30.6601	30.2309	19.924	27.1179	31.9792	31.7181	27.2875	33.9765	36.8934	31.1705	31.4779	26.0617	25.2794	26.4539	30.2549	22.267	20.3503	23.0136	20.0377	25.5538	25.0716	29.1526	23.7183
Pde8a	1.85439	1.35783	2.16946	1.78664	1.75837	2.54792	1.7803	2.02842	2.22107	1.11751	3.85573	5.70239	2.10704	2.19458	2.90528	2.0326	2.25981	1.5617	1.51197	1.85164	3.03032	1.60433	2.03751	2.38139	1.70315	2.6189	2.82499	1.78829	1.33424
Pdzk1ip1	60.2287	45.4529	56.1622	65.5245	82.4108	49.7232	60.8996	72.392	37.5494	55.1393	37.543	43.103	49.1722	39.9963	30.8592	55.0523	35.902	47.2013	49.7642	68.4354	43.656	56.4723	87.9639	46.4399	83.8363	60.244	71.5387	44.7521	80.3667
Phf2	6.31491	6.04546	6.58655	6.08984	4.94841	9.27416	8.75971	8.4862	8.5424	5.07751	11.4812	6.91374	8.16326	8.8863	8.37091	7.64368	7.25396	7.75589	6.66315	5.64895	8.27985	6.84293	5.29003	8.12082	4.59903	8.30352	5.60996	5.60792	4.92147
Pim3	18.5483	24.2643	19.2616	21.9387	17.2582	24.612	18.8765	19.5355	24.6354	17.2578	28.7982	38.1314	22.149	24.7642	23.8762	20.6065	22.3447	22.7788	17.2724	29.1409	21.4141	24.2805	26.9724	26.5648	31.8957	26.2923	29.452	26.189	30.8414
Pla2g4c	1.99221	0.773566	0.781718	5.26166	0.798071	0.359943	4.28985	6.37848	1.00916	0.343713	19.9472	0.574832	0.474303	8.20606	31.4107	0.573131	4.73226	1.22725	1.32697	0.510796	0.461045	0.59481	0.437501	0.538667	0.249646	13.1308	0.612032	0.525714	3.5206
Plbd1	24.55	18.5487	16.9874	22.3537	25.8028	16.1593	16.3955	21.6563	13.7184	21.8765	14.9765	16.7595	19.7242	13.9082	12.4901	20.0476	12.3239	12.6841	16.5264	24.8574	17.2711	20.5004	24.2528	23.4339	26.3441	22.5166	18.0298	16.9014	18.8798
Plet1	20.89	45.0345	43.8517	30.437	28.0719	49.8785	41.5875	38.1657	31.687	26.1073	50.4398	74.9606	59.4906	60.9349	75.0091	32.9922	40.1457	46.0051	37.1293	38.2198	62.368	40.5074	25.1109	47.6093	37.6849	29.2399	38.4027	65.2404	18.5636
Plk3	11.422	14.6235	13.6128	12.7814	15.4719	8.21557	8.43123	13.0438	7.74895	14.2768	9.314	6.91312	12.5973	8.62279	5.90481	11.3481	8.64273	8.1123	10.2106	6.13867	9.59132	9.54244	11.2611	8.30369	26.3082	10.6535	13.9621	8.18702	17.6319
Pmaip1	12.2715	11.6758	8.39687	12.7265	11.5153	9.81417	10.205	11.123	9.81431	11.6814	5.70041	7.89942	8.98173	7.12163	7.73331	8.09098	8.59967	9.81679	11.6058	13.9543	9.36607	9.60166	9.36826	8.25871	9.76285	14.2385	11.6983	8.02702	10.9899
Pml	14.757	13.1979	15.2333	15.4143	13.3757	13.5289	10.9514	16.161	11.773	11.8938	25.849	20.4211	20.7671	21.1547	23.269	18.2985	13.8191	18.4962	17.5562	15.9754	16.6776	14.6977	14.7038	18.6288	15.2644	19.4951	12.8082	18.1801	12.6661
Polr2a	16.1217	17.7556	18.2634	14.1184	12.0127	16.7256	18.8516	19.9687	20.7536	22.2046	21.7051	18.9378	20.7623	20.8859	21.2156	19.1818	16.2224	19.6517	18.6974	14.6122	19.8015	18.464	18.2462	19.967	17.1156	18.4571	15.5798	19.2231	15.1329
Polr2j	25.3163	21.4477	22.6669	24.1755	36.4457	14.8634	13.6656	21.8612	15.2071	15.1579	22.1495	12.4241	20.2408	10.6141	14.5499	18.541	22.5219	19.0978	17.417	26.705	14.3691	22.004	26.9282	13.4196	32.2591	23.9627	16.6805	22.2632	17.4341
Pom121	4.4027	3.44204	3.72329	4.87268	3.1411	5.22876	5.00031	4.95791	5.32967	3.1965	6.47792	4.73227	4.78171	6.48457	6.63121	5.19103	5.71987	5.86201	4.27307	3.37742	4.1467	3.32776	4.58604	5.07886	3.14263	5.11943	2.94859	3.44631	3.76329
Por	27.8702	26.3311	26.1784	27.1435	24.237	30.0092	30.3341	28.0593	24.6533	28.6173	38.8233	36.7244	41.8248	34.3019	30.2573	36.7901	30.7388	29.0788	23.1883	33.4547	33.6161	29.4979	28.8505	30.9035	39.8215	28.3209	33.3281	34.4542	27.2153
Postn	36.0746	33.0692	33.6649	36.1296	45.8245	30.6136	32.3813	29.9289	39.8212	35.2984	22.0115	33.798	30.9011	26.2146	25.6513	27.1617	32.9679	31.1729	36.4169	38.9574	31.8369	36.198	43.2701	36.2564	35.7662	34.8904	39.7759	34.172	38.0303
Ppp2r1a	38.4854	39.3632	42.2188	34.3795	38.6433	46.801	41.0251	39.1283	43.6767	34.4992	55.2669	48.5176	49.5223	53.1165	46.6392	46.5137	41.2889	43.8392	34.3255	34.2867	43.0911	40.8028	39.7351	42.0901	36.6366	42.0734	34.6996	46.3375	34.5933
Ppy	10.1818	9.81501	5.86352	10.2593	26.7128	6.05187	8.99583	11.9376	13.8349	15.7385	2.24133	4.48725	7.69401	5.89892	3.34493	13.2153	8.2675	5.84725	4.72173	5.62986	8.78923	8.94206	13.1591	12.5185	16.5803	16.8463	9.96163	7.50432	16.4535
Prap1	9.18112	11.7421	3.0616	5.18499	4.01548	10.5573	8.68579	4.49618	12.2448	4.00029	20.4812	17.281	7.03436	24.3872	12.6923	11.4661	1.73357	17.67	9.47137	5.4305	12.4118	14.0477	6.84003	23.0851	5.55843	8.53769	11.221	14.717	7.05607
Prdx6b	126.605	88.9194	75.2695	123.304	165.492	92.7958	122.4	132.836	73.6519	125.909	77.6373	61.1455	99.1559	62.8811	59.9931	77.43	71.1537	88.3298	95.094	128.186	81.4523	121.335	131.681	79.0059	205.125	150.537	115.141	76.8229	129.856
Prelid2	8.22439	14.1743	12.5657	11.155	20.1774	8.67421	3.90283	8.35344	10.1221	15.623	6.49202	3.18418	5.17817	6.62001	3.28541	8.11573	7.60168	5.34647	7.41152	12.6021	8.05207	8.70353	8.46825	7.34495	4.99151	5.65104	11.5669	7.29062	7.06799
Prkab2	5.52811	4.46043	4.60933	4.84452	4.11472	5.81261	4.97343	3.34789	4.7446	4.45862	2.73343	3.23816	3.52042	3.06226	3.67106	3.11315	3.57172	4.56149	3.66133	4.43828	3.51858	3.62388	3.24468	4.60507	3.77566	4.43161	4.4703	5.34668	4.69285
Prkacb	43.9173	35.8556	37.308	42.1055	33.1256	38.0441	35.8743	37.3586	40.4176	37.2483	26.6383	29.7132	29.7704	30.1609	28.9013	36.2714	39.8732	36.936	34.4682	37.7589	32.6292	31.9196	35.8907	27.8633	36.3314	34.3448	31.1779	26.2559	39.9319
Prkg2	2.37934	4.56094	4.66087	2.67043	1.08173	4.33184	4.61072	2.07373	4.3926	2.43539	5.60249	7.61661	4.77738	5.57971	5.5108	1.99032	1.91097	5.2568	3.52131	2.66816	6.01058	5.24013	2.1289	6.99748	1.98645	2.01233	4.40626	6.40224	1.99634
Prpsap1	18.6751	17.0489	17.5381	15.0715	14.5769	18.7159	18.6314	15.236	16.3135	11.2596	33.0046	27.9999	20.6239	24.0256	29.4233	16.9635	18.2541	16.1778	15.2834	18.495	21.1166	21.9567	21.4135	25.7067	19.7681	23.6148	20.97	23.5353	12.0791
Prrc2a	24.1583	21.9999	24.6988	24.2573	16.1665	24.1523	25.4833	28.901	23.2672	18.0467	38.1849	23.1259	26.6857	30.5064	32.3306	27.3887	26.7765	28.6675	21.0832	18.0366	24.5032	19.262	18.6232	26.5419	18.7784	19.8418	16.841	18.3889	17.5803
Psmd6	33.7038	40.9643	38.4463	40.9522	57.8529	33.1744	30.4262	31.6855	40.2903	35.4092	39.8757	31.1695	23.7318	28.9345	28.4562	30.9316	38.5385	23.5627	30.0116	32.8877	29.9821	32.9005	46.2465	35.8141	35.923	27.2774	46.6584	36.3715	37.1327
Ptn	15.1431	15.903	21.8312	23.6334	23.7331	16.1166	15.5945	15.7611	18.659	19.9291	12.6546	13.3986	14.756	10.0213	12.8633	12.331	15.3133	14.7305	14.5053	21.1953	20.3912	15.1167	18.3023	16.5867	18.1248	19.9181	17.9802	14.5488	17.1736
Rap1gap	19.165	30.7579	31.8865	23.1894	20.4373	31.7514	28.5638	28.0162	25.2754	25.3739	33.9919	38.6995	33.4959	35.4632	30.7484	37.7654	30.2906	31.0626	25.7693	28.4516	37.6771	29.7442	26.2155	37.0096	33.0506	25.6299	29.5248	43.4741	23.6381
Rassf9	4.76383	2.61774	3.36156	2.47116	4.23181	2.94698	2.96973	2.4884	3.47986	4.10725	1.49356	1.90489	1.67175	2.49218	2.25454	1.82271	3.06514	2.62815	3.42274	3.0954	3.9565	2.9331	2.83987	4.04143	2.63272	3.30413	2.63016	1.43093	2.67533
Rbp2	14.3284	12.8258	8.29717	14.4284	24.4776	15.267	17.8669	14.7706	14.9896	11.7549	2.85256	10.4639	8.51312	7.24684	10.0815	11.0317	6.2696	16.5414	12.0008	9.38131	12.0511	17.8271	15.0505	16.1087	22.8586	15.4909	17.7833	9.06881	18.2604
Rdh9	13.6723	13.2731	9.18929	11.3968	11.9599	9.15745	9.14417	11.4624	6.74043	11.2945	7.07647	8.99665	11.3714	5.36359	5.32057	10.169	10.4837	9.6479	14.2351	10.7684	9.87449	13.6898	13.2583	9.13163	11.946	15.9469	12.2868	9.77792	14.2115
Rdm1	357.161	343.687	187.801	244.507	292.887	273.371	290.782	293.695	404.061	285.101	580.343	344.359	374.793	794.668	341.6	526.733	160.436	534.164	284.89	376.401	283.679	312.171	582.95	686.99	229.585	562.518	287.197	246.016	192.217
Reg3b	146.259	37.6548	14.2056	14.8446	2.32727	73.1566	47.8438	2.18947	21.496	9.29977	94.2871	76.1991	72.7359	39.0068	54.6064	12.4274	3.58227	42.6441	30.5298	18.015	87.7177	29.0207	23.588	539.458	3.52948	1.33375	9.81945	61.9116	3.52982
Reg3g	34.3415	9.76493	3.46539	5.4331	2.27077	14.757	13.1725	2.56533	6.06405	5.29439	10.7582	29.3813	25.6701	17.9756	20.0006	5.68274	2.18507	12.5351	11.4896	19.4552	29.6726	11.2278	10.4006	143.556	1.14834	3.9076	3.19543	25.523	1.91451
Rep15	104.051	93.7774	76.9615	90.1333	111.561	102.512	80.9865	81.4911	79.514	91.3167	80.8782	70.0377	75.7937	50.4082	60.0163	86.0836	72.7521	82.572	83.9013	95.266	64.0086	99.5347	109.362	93.0268	104.33	108.17	99.0958	99.1633	95.0912
Rgs19	3.96495	2.97896	6.32549	5.21577	10.5725	4.18447	4.94632	3.16938	3.88099	2.77598	3.29709	2.46294	3.66521	2.21261	4.05728	3.63141	4.80094	3.13879	4.74766	3.77912	2.24023	4.41584	4.72322	5.27627	4.61857	2.89619	5.09074	2.9747	4.65783
Rnasek	35.8898	39.5523	35.7187	38.2891	21.0813	42.2293	37.1121	50.5821	29.9998	48.0035	53.5663	43.5225	53.9302	47.8364	50.7691	41.4804	34.6714	39.463	44.0419	40.9756	33.6892	43.5478	26.8716	44.3944	44.4674	73.4241	27.5849	30.6115	31.2483
Rnf31	11.3896	10.3837	10.0553	8.8737	7.47777	6.31355	7.4468	8.97776	6.53274	6.00649	13.0278	12.2434	15.364	13.7406	15.0101	10.2113	9.03933	8.05209	9.00255	7.50891	7.00164	9.90696	7.05023	7.23528	10.7585	11.3083	9.34947	8.2603	7.70058
Rnf44	31.5989	28.2419	27.5852	27.4997	19.1395	30.98	35.9574	33.7149	28.7667	26.9605	39.6629	33.9104	33.053	38.6064	36.8828	31.7207	32.5184	33.1512	30.9818	28.7522	37.6187	26.83	26.9665	31.5607	28.3757	30.465	25.7513	28.5991	21.7242
Rnu12	2108.14	1009.98	928.648	953.327	1770.64	1785.03	1334.05	870.715	1697.87	754.835	3529.64	1900.86	852.727	3242.05	1704.34	1653.62	434.745	2259.37	1331.06	1342.18	850.081	971.267	3443.41	1749.76	830.783	1943.2	1206	1137.73	935.993
Rnu1b1	330.608	507.704	328.548	337.204	747.489	293.051	311.876	365.901	388.01	528.667	1339.89	416.192	559.208	662.063	441.335	410.485	251.17	512.502	301.377	739.934	450.754	589.709	950.886	1320.03	332.549	772.013	424.61	479.811	312.873
Rnu1b2	261.731	315.905	337.194	278.045	640.705	341.893	239.105	386.612	611.862	317.2	1719.53	620.876	594.159	690.438	282.455	431.357	225.187	489.891	198.78	669.464	527.711	470.058	1025.96	1278.12	469.906	969.965	355.923	472.429	267.246
Rnu1b6	141.327	88.1106	50.6506	115.785	199.653	127.491	91.8327	162.614	153.729	118.254	1355.31	134.115	171.643	269.684	78.0336	126.525	50.8597	214.298	50.2825	220.748	75.5194	134.192	288.394	329.039	70.8012	349.798	97.9279	108.636	70.3175
Rpl12	20.5803	31.6577	32.5629	51.6963	58.2324	13.783	35.1432	26.1126	35.5645	43.5268	28.9645	22.32	35.5768	26.8107	13.8292	30.0591	21.238	21.6622	24.2838	26.269	32.6092	33.3166	51.0709	56.7418	22.4866	59.5232	28.9568	18.2338	17.5596
Rpl31-ps12	216.554	224.721	153.497	238.778	400.085	200.295	192.239	194.297	187.191	240.317	228.142	209.426	221.688	120.561	145.515	127.415	136.413	148.608	201.303	291.372	157.614	188.562	396.344	299.49	217.259	235.538	261.878	220.047	183.117
Rpl36al	233.466	287.129	219.811	257.354	461.35	252.198	210.62	203.916	247.512	212.262	238.242	208.767	202.761	169.265	216.81	174.409	230.435	164.208	200.437	316.12	199.364	237.628	358.535	334.789	241.344	232.686	301.066	241.457	219.912
Rpl37	16.1649	7.26884	8.03465	11.5606	19.0792	12.4902	16.6914	11.9347	14.6575	11.1893	14.5822	24.4047	32.339	18.875	19.0661	20.7874	8.36662	10.1498	12.511	16.293	17.059	14.9279	25.5911	21.2862	16.333	13.6496	14.8554	19.5285	15.0221
Rps17	53.0825	40.9194	37.3352	63.2721	111.81	43.1526	45.7997	54.2754	27.2804	42.2612	25.1029	38.3445	59.2721	35.3316	41.9733	48.9679	35.3669	40.8165	35.029	65.2117	28.1178	51.5749	57.1067	58.6	58.7288	66.1222	50.0328	70.4459	37.1418
Rps19	63.3212	49.3111	48.2847	62.5355	117.692	59.2932	62.2555	78.6678	78.462	51.2433	146.282	82.6758	83.3219	83.2497	65.7	72.8242	48.3993	47.6059	50.8717	79.7897	62.9204	76.8926	89.1131	70.0274	66.2301	85.8551	81.1036	63.2497	70.0445
Rps6ka4	9.44897	9.12546	9.17673	9.25926	7.46533	7.49079	9.83238	8.80001	9.60915	8.77874	14.1369	11.8899	11.7602	13.1477	9.32052	11.539	9.04913	9.57552	8.19035	7.70068	7.86544	7.62147	7.63548	7.57447	10.5941	11.6906	8.54297	8.70529	8.42341
Rsrc1	10.7189	9.35905	11.8301	8.12382	10.9683	11.7319	12.037	13.03	16.6005	9.82447	18.2153	15.4416	18.1279	14.7285	16.091	12.7028	11.8628	8.74328	14.1785	14.0065	8.24897	15.0165	16.2775	10.971	11.5831	18.5189	10.207	11.0977	12.5742
S100a6	410.017	336.586	270.443	350.162	506.838	321.589	362.189	312.676	274.618	248.847	341.83	305.587	311.371	238.748	232.593	309.581	294.28	297.087	320.293	468.708	274.653	358.742	446.592	336.309	404.071	427.445	315.403	259.332	322.071
Sardh	1.59741	2.14262	2.4883	1.24091	1.48752	2.536	2.30394	2.8219	2.02013	2.14043	3.12517	4.03396	2.42953	2.89818	3.26453	3.25406	2.90615	1.57404	2.73743	2.71495	3.70675	1.8477	2.13242	2.98687	2.24828	1.6978	2.79309	3.14207	2.25927
Scaf1	16.6609	16.4595	20.5706	18.0531	11.5152	15.5268	17.9327	21.0878	17.928	16.4017	19.2358	20.8107	24.0294	21.0211	25.2759	22.5692	23.3541	15.9235	15.6166	16.2549	20.2596	15.9226	12.4869	17.5278	20.5107	18.7845	16.1224	17.0401	15.9817
Sct	4.82817	11.3325	14.7221	6.77481	10.985	11.0578	17.4964	6.85322	15.5752	9.78463	19.9214	23.2731	18.1723	21.1078	22.5341	12.2888	12.0142	12.1901	9.87752	5.42377	20.3359	24.5688	6.34705	22.562	11.2103	13.2544	15.207	22.067	6.55318
Sepp1	162.709	144.515	141.293	168.597	254.519	112.75	144.126	136.516	174.313	205.374	107.579	148.835	164.479	124.968	119.205	118.589	116.908	158.43	171.844	272.503	170.717	180.547	184.711	199.346	181.958	176.727	194.835	170.086	144.562
Serpinb1a	85.4118	79.4611	67.2564	81.9041	109.455	67.0705	87.7052	71.5578	64.7772	82.039	59.7075	61.7089	75.6178	56.8743	55.7031	71.6015	64.9806	86.4199	107.803	83.1865	61.0751	85.994	106.06	83.5123	96.0661	102.479	78.6038	80.4958	81.1668
Sgk1	54.2351	137.021	95.8225	78.4079	106.624	95.0185	63.3038	63.2608	91.5898	84.5243	86.4529	90.9921	60.9248	58.7725	58.6517	89.8286	63.378	72.6377	58.4352	47.8625	74.2668	79.807	70.163	63.6347	104.832	68.7693	95.2769	94.6236	90.6756
Sipa1l3	16.6269	14.8874	16.5916	16.5169	12.0729	14.2792	17.7307	18.2849	17.2052	17.8346	27.5297	18.2237	20.6408	21.3239	19.0501	22.6527	22.1903	20.905	17.0121	13.5226	16.2924	15.1289	15.3399	18.1941	14.6623	17.5308	11.3155	13.0352	14.6458
Slc10a2	3.57647	7.84928	3.69855	2.58605	1.01109	6.61653	5.15656	1.51313	9.0412	1.19796	2.1003	11.1992	5.92135	9.62356	10.1591	2.79342	0.830561	9.12457	7.72798	1.9662	11.3878	8.44229	3.7583	9.65035	1.40037	2.3217	5.74144	15.0485	4.41898
Slc15a1	17.968	17.921	14.1404	18.5848	20.5722	13.7747	14.5403	18.4768	17.9426	20.7876	12.6394	10.999	17.844	11.0023	9.39106	12.0844	12.4688	12.6474	15.5383	22.0123	12.9175	15.8447	20.9227	12.7655	30.3973	25.1267	19.7906	13.1497	22.2594
Slc15a2	1.61673	2.74151	4.77427	1.30366	2.59668	1.39332	3.44326	1.89562	0.314805	0.776258	2.3562	8.1334	0.378478	3.91422	7.99266	1.15107	0.294426	1.02825	1.04563	1.15805	0.701818	3.10623	0.084512	2.90172	2.52187	5.38902	4.09931	1.96626	3.1116
Slc20a1	69.5629	57.6387	56.9681	56.7687	72.9901	48.2689	46.4188	56.2673	70.2518	92.4931	20.0208	36.4264	71.9823	42.7017	36.0254	52.7444	39.2321	75.4926	78.4532	54.7865	58.0074	74.9659	84.7377	49.2301	85.1292	91.8478	54.2304	47.1032	94.5149
Slc26a3	94.9214	114.24	120.145	120.118	140.335	123.227	95.8717	141.019	146.346	175.19	69.2143	93.4461	120.51	72.2852	71.9149	112.207	114.763	89.3611	127.877	131.797	118.055	142.603	154.059	122.202	161.266	164.98	159.429	106.431	185.383
Slc27a4	14.9071	18.8441	19.1242	16.0824	14.1457	16.3378	18.4217	17.9714	18.3022	22.255	20.6583	26.6157	22.1926	22.2345	24.2607	20.9935	14.3417	18.1133	17.5874	18.0624	23.3573	18.9921	14.7961	17.9084	20.7571	15.2949	19.6116	28.0002	18.3549
Slc2a10	3.87249	6.01658	6.39968	4.47908	3.28175	5.51675	6.75437	4.12143	5.68779	4.16599	9.61345	6.22791	4.41897	6.64594	7.79821	6.74159	7.22088	4.04735	4.66674	4.85751	6.10913	5.05858	5.21947	4.99295	4.59901	3.54034	5.1105	6.55832	5.51741
Slc35d1	19.0944	31.9871	23.8818	18.518	13.2125	34.8221	27.3153	20.8991	29.5787	16.1233	24.2024	39.8914	29.4628	33.6348	41.0737	20.168	21.3898	30.6107	19.4682	13.7823	25.1681	23.2634	15.1521	19.6407	19.9218	17.2223	17.2554	34.3424	18.2275
Slc37a2	54.3463	43.2383	38.033	44.283	51.6223	35.4517	31.1503	66.4081	55.4375	80.6788	13.6918	29.9183	52.5469	27.1717	23.0611	26.4178	11.8566	45.9701	41.5958	26.3001	27.8794	49.0239	57.8435	30.102	49.4178	61.1418	48.5097	26.6231	55.7297
Slc46a1	12.4539	8.97065	7.86493	10.7499	11.1916	5.30923	8.44084	15.0961	7.12722	15.2611	4.11506	5.66112	12.0864	6.70253	3.81055	7.80055	4.48342	7.88891	7.89913	11.5646	5.36806	8.33883	10.2733	6.12634	22.4594	16.7775	14.6942	6.50799	14.407
Slc4a2	40.1234	45.5766	52.6787	47.1844	39.1989	39.8996	48.1659	54.8198	44.6494	51.2611	63.7492	54.3449	57.3906	55.943	59.5753	53.8194	50.4064	49.8696	44.2987	49.5408	56.1599	55.808	42.277	44.7539	51.9302	49.448	53.6846	64.0841	47.6294
Slc51a	4.91984	9.48884	5.32118	4.59772	1.51645	9.08778	7.26732	1.93287	11.2062	1.69234	10.758	16.3231	8.96868	15.8137	17.3923	6.61819	1.56447	12.7307	8.22994	2.68843	11.2783	7.50073	6.20655	18.4479	3.2637	2.36659	10.881	20.8446	2.41773
Slc5a3	36.9906	32.7804	21.5446	28.8628	22.4634	29.4289	28.117	27.7293	34.4826	28.4836	19.2724	18.6587	23.7823	25.5464	21.0953	24.7258	24.6655	23.164	25.3692	25.5841	22.6836	25.8778	26.0538	21.3079	24.5216	23.7822	23.8074	18.4948	28.8444
Slc9a1	11.9823	11.3674	16.0096	13.306	10.4619	13.2499	13.2692	15.2767	10.4187	12.2039	17.4073	17.9513	17.895	15.7318	15.6459	14.7954	16.8431	15.4234	14.1589	10.8904	14.6695	13.4314	12.3681	9.89008	16.2165	14.5564	12.5625	14.9181	11.1763
Socs3	5.73039	3.4409	4.92333	5.79462	5.32751	4.57661	5.84398	9.75401	5.92352	5.67217	10.1843	5.64523	8.65293	6.1513	6.66404	5.52506	5.43322	4.66587	4.88624	6.72125	2.81356	5.93752	6.40142	11.6779	11.0074	13.8112	6.28235	6.68901	8.10722
Spdef	40.0201	71.0247	57.9298	54.4184	52.1953	68.6188	59.1668	65.208	70.1721	50.054	55.3558	84.5334	59.2	83.9867	75.6808	66.4236	80.0645	59.1318	45.7677	51.5069	68.018	52.8873	44.0365	56.3906	53.256	42.9494	63.5112	70.7653	62.326
Spint2	378.143	334.701	333.46	406.436	366.819	334.52	407.453	390.634	393.049	292.613	556.159	479.313	450.047	522.448	455.791	491.997	348.615	377.992	326.683	397.823	409.668	414.773	432.174	424.939	370.579	434.285	391.353	398.45	319.023
Sptssa	35.3918	34.1737	32.9595	34.6518	47.472	29.4953	32.4623	29.7296	32.2682	34.6198	24.7108	31.5307	19.6365	27.5601	28.8096	19.9118	27.1945	26.9112	30.5845	39.5697	27.2914	31.3795	34.0847	31.0405	31.7726	22.3978	38.2179	29.2699	31.9236
Stk17b	26.7729	27.138	20.4996	21.3024	30.2461	22.1535	20.395	16.2607	22.3679	26.3936	18.5781	20.0111	17.2927	18.4055	17.3615	17.2415	17.5083	23.4128	24.3006	25.2361	21.6774	24.8975	23.1167	25.478	21.1526	18.0489	22.7466	28.4947	25.3732
Stom	33.9137	30.3111	23.3884	30.7679	33.6726	26.5347	24.9518	35.6109	24.2194	36.6306	13.2461	19.9139	33.6166	16.9504	15.4059	24.0585	21.4706	26.0771	27.2967	32.9887	20.6384	30.1122	31.7721	23.2798	37.0406	33.9135	31.8781	18.4814	36.4972
Sumo1	33.1457	31.6615	24.9648	33.2692	41.298	30.5689	29.5625	25.9942	33.6579	33.6725	19.6879	22.1324	25.5042	27.0078	24.824	22.9221	24.0632	30.8818	28.9083	41.5334	31.0449	41.0588	35.0526	32.0806	33.2552	29.3198	35.5452	29.8606	32.7145
Tbx3	6.4893	6.93993	8.5079	5.2082	5.7344	7.84512	7.36944	7.11771	5.88245	6.40794	7.42607	11.2311	8.517	8.96406	10.1253	5.16256	5.52266	8.12773	5.30147	3.80582	7.99123	7.44932	4.25345	8.08161	6.67339	4.9996	7.12132	11.0528	4.30627
Tecpr1	9.06742	7.43126	7.20924	7.88665	6.26286	7.5397	6.3661	9.32768	7.99201	7.59953	13.1894	10.226	8.1952	10.0697	9.55645	10.1418	8.05963	9.78462	7.88014	7.18382	7.60771	8.3137	6.99741	8.95607	7.23718	7.1251	6.75867	7.39519	8.38225
Tgm3	327.078	294.095	239.424	314.14	328.645	151.117	220.959	331.649	187.948	334.593	84.0237	159.335	291.113	124.212	92.9187	189.348	117.796	234.508	232.566	230.045	165.092	252.581	291.315	168.542	355.953	354.701	250.789	123.42	270.359
Thbs4	32.8889	30.9695	32.3214	41.4597	38.8489	22.9324	29.6838	39.4588	24.3754	40.1898	20.1931	21.3298	39.5229	29.0429	23.5093	38.0479	33.4907	28.3476	31.824	33.5099	28.3848	28.6514	33.305	26.8523	35.502	33.1839	28.5896	19.6799	33.6353
Tle3	12.4198	12.4377	13.198	11.6911	7.99282	14.335	13.6753	15.0338	14.811	9.63075	18.3768	16.6365	14.3941	16.619	17.5982	12.9303	12.7755	15.2923	10.9307	11.7073	14.7714	12.6676	10.4735	10.6959	10.6382	14.4967	12.4706	11.3923	10.2891
Tm2d1	5.77747	6.73845	5.56445	8.30494	8.45373	3.86666	5.82157	7.28049	7.93374	4.02672	26.6105	16.5984	7.87648	7.92309	11.8315	10.0864	2.93532	5.31383	4.32816	7.27173	8.59572	4.9286	10.2565	12.3035	8.01758	5.20087	14.4661	12.9076	9.56525
Tm4sf20	162.364	133.498	127.17	163.982	198.451	157.162	165.541	146.535	133.715	182.733	103.622	103.85	150.305	112.967	96.0972	128.634	128.548	136.55	139.978	135.714	127.79	181.934	190.933	153.269	176.614	160.87	180.99	123.824	220.234
Tmem168	26.2451	27.2214	21.188	24.7693	25.4753	21.3268	19.8512	23.2355	21.4168	23.1949	17.8145	17.1006	18.8878	19.884	16.947	17.6489	21.4545	19.8842	19.0426	21.5084	21.7385	22.1548	23.6933	17.2151	22.714	23.052	21.9889	18.7924	24.296
Tmem37	28.6247	31.5038	30.0214	33.2804	43.5625	22.3684	23.2954	39.7314	28.603	32.4656	23.4857	25.3332	27.4048	18.1705	13.1224	24.8853	16.9818	18.6716	28.6169	47.4159	22.1737	31.974	44.7191	28.0167	54.1086	45.5751	32.134	27.4153	50.2397
Tmod3	27.9676	34.1886	28.3228	27.6543	33.6952	26.2327	23.1451	19.5036	26.034	26.3005	27.7076	20.7216	21.5043	25.3672	21.4061	22.2991	28.9064	27.7431	26.6498	25.8119	24.2007	24.0515	24.292	23.3361	24.3674	19.0761	27.3108	25.3643	25.416
Tmprss2	139.249	117.524	107.191	119.208	113.118	111.549	113.016	125.102	109.311	124.681	87.8518	80.5372	95.4928	100.41	95.3909	115.064	114.775	104.88	115.467	124.789	96.1758	104.134	113.615	74.8558	140.2	120.55	102.257	88.0386	141.841
Tnfaip3	24.8672	20.3243	22.8058	23.554	20.0471	23.1202	19.0843	20.4394	20.1046	24.1448	16.1947	14.4673	20.3017	17.6061	16.4246	17.5741	18.7501	17.2311	20.2779	32.1458	18.7722	22.1305	18.7908	13.618	27.8521	23.794	19.5312	17.689	34.7121
Tnni1	32.708	30.891	24.0275	35.0128	44.8111	24.0779	26.989	54.6696	30.711	32.4155	22.7435	21.5631	36.8279	20.9758	18.4851	33.9792	17.8338	30.6519	28.3195	35.8349	28.5818	33.6344	47.7308	35.482	72.453	55.3501	46.8302	28.1489	45.9361
Tnrc18	21.9396	23.4535	26.2012	20.8429	12.8706	24.8219	27.071	28.3596	27.1209	21.3894	36.129	26.5007	24.8965	32.4709	32.0531	27.7723	22.7858	30.63	25.3719	17.6499	28.0778	22.0717	20.4803	21.4742	22.7868	25.9072	21.3586	21.5657	19.8859
Tpx2	4.4839	4.86516	4.94342	3.61684	4.1556	3.42961	2.78839	6.0253	2.73237	3.15434	1.93958	4.03327	1.97289	3.38214	1.88344	3.49846	3.21605	3.34525	3.51047	3.29197	2.44853	3.26862	3.09879	4.45797	2.48649	2.17617	2.73926	3.6837	3.0122
Trpm6	21.5088	18.9612	19.7159	22.3097	20.0399	21.7327	17.2543	18.2337	20.5207	25.933	13.7344	12.0453	17.7039	15.1423	9.14445	21.9093	17.2968	20.5493	18.8511	14.6104	14.5996	17.2526	22.8479	19.8663	22.151	24.869	17.0779	14.5118	21.3443
Trpv3	5.84646	7.4749	5.2557	9.18369	6.99897	6.21487	6.33032	6.26058	6.7529	7.68506	4.71331	3.22	6.16794	6.67301	3.76044	5.11194	6.44062	5.37277	8.00939	6.38636	6.42787	6.13955	5.93433	4.33504	7.2555	6.5552	6.13518	2.38769	8.7457
Ube2b	42.2174	39.4182	38.3725	37.5816	45.1853	27.7271	33.4277	36.7688	38.0479	37.5579	23.5751	29.6214	28.815	34.3909	34.9956	31.1026	33.6586	41.4655	41.0606	51.8912	38.1344	44.5945	38.5148	34.9834	34.1333	36.9884	45.6117	37.3618	39.4225
Umad1	11.4145	12.3323	10.747	12.1102	14.3702	11.0401	10.7636	9.34202	12.7097	10.9556	7.41923	7.7394	8.65027	8.10334	5.15655	9.33113	9.02333	8.36822	11.793	12.3929	9.68099	12.7002	11.9263	9.35138	11.1278	8.99814	11.5917	9.92033	13.3453
Unc119	26.4033	20.6404	19.6971	28.4221	35.9333	17.7772	21.9233	18.5831	21.2794	20.9512	20.2561	14.0602	21.1745	20.5332	10.7602	22.2774	16.9431	17.3397	24.0789	36.0338	19.2678	25.4753	29.5179	22.138	29.8802	26.9175	22.4525	8.23298	34.801
Upf1	17.3107	16.4129	15.8445	15.9962	10.3573	16.0886	17.001	17.2677	17.6181	10.9243	26.2949	18.715	17.2559	21.4793	16.4816	22.085	16.2778	15.2891	13.891	14.7687	14.854	15.0478	14.693	17.1534	12.4296	14.2776	11.6673	13.4529	11.8764
Vav2	2.94681	4.13481	3.28071	2.52876	2.05116	3.51617	3.86516	3.36007	3.68242	2.53071	3.85815	4.55633	3.41571	4.0684	5.91568	3.42052	3.75982	3.18604	3.79617	3.15921	4.28144	2.87984	2.68396	3.62279	2.54894	2.21136	4.3731	5.14876	3.26449
Wbp5	48.6147	54.2382	51.6543	47.3242	80.854	44.9716	38.3917	44.1744	50.2841	53.2779	39.635	37.3378	40.2553	46.0273	36.0447	37.9278	54.656	50.0963	43.1943	58.7325	45.797	52.5639	41.5758	58.8396	31.4102	46.2243	47.1269	39.7876	41.4482
Wnk4	8.74439	9.0122	9.22789	8.55198	7.25062	10.5083	12.1944	11.0785	8.25803	9.24656	13.6477	9.60398	10.549	13.2356	10.3414	11.952	11.5095	11.9914	9.14139	7.64698	9.61283	8.40378	7.32028	7.52512	7.83382	8.04768	7.4565	9.45381	7.07696
Xdh	12.3259	13.5549	11.4852	12.2943	9.86215	10.7774	10.6159	12.216	9.43567	9.9088	15.1624	13.2762	19.341	15.7807	18.583	12.3116	9.93898	12.6707	14.1114	13.0627	10.3101	11.4998	12.2526	11.8675	14.111	10.5551	14.4752	14.7293	10.064
Zfp703	11.2882	15.2649	14.3106	11.7977	8.14441	14.9509	16.9227	15.4074	14.029	13.5861	21.6438	20.2217	15.4508	18.9279	19.7694	12.3433	13.1036	15.0949	9.02587	9.95954	13.9843	11.443	9.4798	19.1312	10.026	12.0901	12.5156	11.1752	7.83525
Zg16	2165.5	1829.49	1989.12	2637.86	4659.76	1565.53	2040.95	1989.2	1404.65	2242.91	1693.57	1932.84	2068.78	1064.53	1026.29	2912.43	1922.31	2041.27	2111.3	3086.58	1636.3	2597.03	3663.31	2167.81	3141.91	2790.39	2698.64	2786.27	2599.66
Zmiz1	16.7243	16.2893	16.3172	12.674	10.4582	18.0507	16.0457	19.221	16.6123	16.103	23.3823	20.7672	20.5382	20.0733	22.7173	21.5546	19.1633	21.9867	18.9171	18.3451	19.5999	16.3563	16.9218	16.1234	15.9637	17.5202	11.3993	16.4223	13.3253
Znrd1	12.6664	13.3442	9.79415	12.4707	22.7457	13.1294	11.1388	10.671	12.9851	13.5826	4.16816	5.10078	6.76035	8.95352	8.42359	7.63867	11.0851	7.09027	12.4039	20.2051	11.4811	12.0946	14.5453	3.03037	10.0199	13.1144	11.0917	11.9555	11.2746
